# Supplementary material for: Effect of genetic background on the evolution of Vancomycin-Intermediate Staphylococcus aureus (VISA)
Source: PeerJ. 2021 Jul 13;9:e11764. doi: 10.7717/peerj.11764 (PMC8284308; doi:10.7717/peerj.11764)
Supplement: Supplemental Information 10 — Strains were grown in duplicate in a 96-well plate beginning at an OD < 0.1 and grown for 24 h at 37 °C with constant shaking in a Biotek Eon Microplate Spectrophotometer, with OD measurements every 10 min. Strains analyzed were derived from selection at vancomycin concentrations of 4, 6, and 8 μg/ml. [file peerj-09-11764-s010.xlsx]

## Sheet: NRS70-va4
Time	NRS70	NRS70-2	NRS70-4.1	NRS70-4.1-2	NRS70-4.2	NRS70-4.2-2	NRS70-4.3	NRS70-4.3-2	NRS70-4.4	NRS70-4.4-2	NRS70-4.5	NRS70-4.5-2	NRS70-4.6	NRS70-4.6-2	NRS70-4.7	NRS70-4.7-2	NRS70-4.8	NRS70-4.8-2	NRS70-4.9	NRS70-4.9-2	NRS70-4.10	NRS70-4.10-2	NRS70-4.11	NRS70-4.11-2	NRS70-4.12	NRS70-4.12-2	NRS70-4.13	NRS70-4.13-2	NRS70-4.14	NRS70-4.14-2	NRS70-4.15	NRS70-4.15-2	NRS70-4.16	NRS70-4.16-2	NRS70-4.17	NRS70-4.17-2	NRS70-4.18	NRS70-4.18-2	NRS70-4.19	NRS70-4.19-2	NRS70-4.20	NRS70-4.20-2	NRS70-4.21	NRS70-4.21-2	NRS70-4.22	NRS70-4.22-2	NRS70-4.23	NRS70-4.23-2	NRS70-4.24
00:00:00	0.094	0.093	0.094	0.092	0.093	0.097	0.092	0.097	0.094	0.096	0.099	0.093	0.094	0.091	0.096	0.092	0.094	0.094	0.092	0.093	0.093	0.094	0.093	0.094	0.092	0.098	0.093	0.093	0.094	0.092	0.093	0.092	0.094	0.093	0.093	0.092	0.092	0.093	0.095	0.092	0.094	0.092	0.094	0.093	0.093	0.094	0.094	0.092	0.092
00:09:03	0.094	0.093	0.094	0.092	0.093	0.097	0.092	0.097	0.094	0.096	0.099	0.093	0.094	0.091	0.096	0.092	0.094	0.094	0.092	0.093	0.093	0.094	0.093	0.094	0.092	0.098	0.093	0.093	0.094	0.092	0.093	0.092	0.094	0.093	0.093	0.092	0.092	0.093	0.095	0.092	0.094	0.092	0.094	0.093	0.093	0.094	0.094	0.092	0.092
00:19:03	0.094	0.093	0.094	0.092	0.093	0.099	0.092	0.097	0.095	0.096	0.099	0.093	0.094	0.091	0.096	0.092	0.094	0.094	0.092	0.093	0.093	0.094	0.093	0.094	0.091	0.099	0.093	0.093	0.094	0.092	0.093	0.093	0.094	0.094	0.093	0.092	0.092	0.093	0.095	0.092	0.094	0.092	0.094	0.093	0.093	0.095	0.094	0.092	0.092
00:29:03	0.095	0.093	0.095	0.092	0.094	0.099	0.092	0.097	0.095	0.096	0.099	0.093	0.095	0.092	0.096	0.092	0.095	0.094	0.093	0.093	0.093	0.094	0.093	0.094	0.092	0.099	0.093	0.093	0.094	0.092	0.094	0.093	0.094	0.094	0.093	0.092	0.092	0.093	0.095	0.092	0.094	0.092	0.094	0.094	0.093	0.094	0.094	0.093	0.092
00:39:03	0.095	0.093	0.095	0.092	0.094	0.099	0.092	0.097	0.095	0.096	0.099	0.094	0.095	0.091	0.096	0.092	0.094	0.094	0.092	0.093	0.093	0.094	0.093	0.094	0.092	0.099	0.093	0.093	0.094	0.092	0.094	0.093	0.094	0.094	0.093	0.092	0.092	0.093	0.095	0.092	0.094	0.092	0.094	0.094	0.093	0.098	0.094	0.093	0.092
00:49:03	0.095	0.093	0.095	0.092	0.095	0.099	0.092	0.097	0.095	0.096	0.099	0.094	0.095	0.091	0.096	0.092	0.094	0.094	0.092	0.093	0.093	0.094	0.093	0.094	0.091	0.099	0.093	0.093	0.094	0.092	0.094	0.093	0.094	0.094	0.093	0.092	0.092	0.093	0.095	0.092	0.094	0.092	0.094	0.094	0.093	0.094	0.094	0.092	0.092
00:59:03	0.095	0.094	0.095	0.092	0.095	0.1	0.092	0.097	0.095	0.097	0.099	0.094	0.095	0.092	0.096	0.092	0.095	0.094	0.093	0.093	0.093	0.094	0.093	0.094	0.092	0.099	0.093	0.094	0.094	0.093	0.094	0.093	0.094	0.094	0.094	0.093	0.092	0.093	0.095	0.093	0.094	0.093	0.094	0.094	0.094	0.098	0.095	0.093	0.092
01:09:03	0.095	0.094	0.095	0.092	0.096	0.101	0.092	0.097	0.095	0.097	0.099	0.094	0.095	0.092	0.096	0.092	0.095	0.094	0.093	0.093	0.093	0.094	0.093	0.094	0.092	0.1	0.093	0.093	0.094	0.093	0.094	0.093	0.094	0.094	0.094	0.093	0.092	0.093	0.096	0.093	0.094	0.093	0.094	0.094	0.094	0.1	0.095	0.093	0.092
01:19:03	0.095	0.094	0.096	0.092	0.096	0.102	0.092	0.097	0.095	0.097	0.099	0.094	0.095	0.092	0.096	0.092	0.095	0.094	0.093	0.093	0.093	0.094	0.093	0.094	0.092	0.1	0.093	0.094	0.095	0.093	0.094	0.093	0.095	0.095	0.094	0.093	0.092	0.093	0.095	0.093	0.096	0.093	0.094	0.094	0.094	0.1	0.095	0.093	0.092
01:29:03	0.096	0.094	0.096	0.093	0.097	0.102	0.093	0.097	0.095	0.098	0.1	0.094	0.095	0.092	0.096	0.092	0.096	0.095	0.094	0.094	0.093	0.094	0.094	0.094	0.092	0.1	0.093	0.094	0.095	0.093	0.094	0.093	0.095	0.095	0.094	0.093	0.092	0.093	0.096	0.093	0.097	0.093	0.095	0.094	0.094	0.099	0.095	0.094	0.093
01:39:03	0.096	0.094	0.097	0.093	0.097	0.103	0.092	0.097	0.095	0.098	0.1	0.094	0.095	0.092	0.096	0.092	0.096	0.095	0.094	0.093	0.093	0.094	0.093	0.094	0.092	0.1	0.093	0.094	0.095	0.093	0.094	0.094	0.095	0.096	0.094	0.093	0.092	0.093	0.096	0.093	0.097	0.093	0.094	0.094	0.094	0.1	0.095	0.094	0.093
01:49:03	0.096	0.095	0.097	0.093	0.098	0.104	0.093	0.097	0.095	0.099	0.1	0.094	0.095	0.092	0.096	0.092	0.096	0.095	0.094	0.093	0.093	0.094	0.094	0.094	0.092	0.1	0.093	0.094	0.095	0.093	0.094	0.094	0.096	0.096	0.094	0.093	0.092	0.093	0.096	0.093	0.096	0.093	0.094	0.094	0.094	0.097	0.095	0.094	0.093
01:59:03	0.097	0.095	0.099	0.093	0.098	0.105	0.093	0.097	0.095	0.099	0.1	0.094	0.095	0.092	0.096	0.092	0.097	0.095	0.095	0.093	0.093	0.095	0.094	0.094	0.092	0.1	0.093	0.094	0.095	0.093	0.094	0.094	0.096	0.096	0.094	0.093	0.092	0.093	0.096	0.093	0.097	0.093	0.094	0.094	0.094	0.097	0.095	0.094	0.093
02:09:03	0.098	0.096	0.1	0.094	0.1	0.107	0.093	0.097	0.095	0.1	0.1	0.095	0.096	0.092	0.096	0.092	0.098	0.095	0.096	0.094	0.094	0.095	0.094	0.095	0.092	0.101	0.094	0.095	0.095	0.093	0.094	0.095	0.097	0.097	0.095	0.093	0.092	0.093	0.096	0.094	0.097	0.094	0.095	0.094	0.094	0.098	0.096	0.094	0.094
02:19:03	0.099	0.097	0.102	0.094	0.101	0.109	0.093	0.097	0.095	0.101	0.1	0.095	0.096	0.092	0.096	0.092	0.099	0.095	0.096	0.094	0.094	0.095	0.094	0.095	0.092	0.101	0.094	0.095	0.095	0.093	0.094	0.095	0.097	0.097	0.095	0.094	0.092	0.093	0.096	0.094	0.098	0.094	0.095	0.094	0.095	0.099	0.096	0.094	0.094
02:29:03	0.1	0.098	0.105	0.094	0.104	0.111	0.093	0.097	0.095	0.102	0.1	0.095	0.096	0.092	0.096	0.092	0.101	0.096	0.097	0.094	0.094	0.096	0.094	0.095	0.092	0.101	0.094	0.095	0.095	0.093	0.094	0.095	0.098	0.098	0.095	0.094	0.092	0.093	0.096	0.094	0.099	0.094	0.095	0.094	0.095	0.099	0.096	0.094	0.094
02:39:03	0.102	0.099	0.108	0.095	0.108	0.114	0.093	0.097	0.095	0.104	0.1	0.095	0.096	0.093	0.096	0.092	0.103	0.096	0.098	0.094	0.094	0.096	0.095	0.095	0.092	0.101	0.094	0.096	0.096	0.093	0.095	0.096	0.099	0.098	0.096	0.094	0.092	0.093	0.096	0.094	0.101	0.094	0.095	0.094	0.095	0.101	0.096	0.095	0.095
02:49:03	0.105	0.101	0.112	0.096	0.112	0.117	0.093	0.097	0.095	0.107	0.1	0.095	0.096	0.093	0.096	0.092	0.105	0.096	0.099	0.095	0.094	0.097	0.095	0.095	0.092	0.101	0.094	0.096	0.096	0.093	0.095	0.096	0.1	0.099	0.096	0.095	0.092	0.093	0.097	0.094	0.102	0.094	0.095	0.094	0.095	0.102	0.097	0.095	0.095
02:59:03	0.109	0.103	0.116	0.097	0.118	0.121	0.093	0.097	0.095	0.11	0.101	0.096	0.096	0.093	0.096	0.093	0.109	0.097	0.101	0.095	0.094	0.098	0.095	0.096	0.092	0.101	0.094	0.097	0.097	0.093	0.095	0.097	0.102	0.101	0.097	0.095	0.093	0.093	0.097	0.094	0.105	0.095	0.095	0.095	0.097	0.105	0.097	0.096	0.096
03:09:03	0.113	0.106	0.121	0.099	0.126	0.125	0.093	0.097	0.095	0.113	0.101	0.096	0.097	0.093	0.096	0.093	0.114	0.098	0.102	0.096	0.095	0.099	0.096	0.096	0.092	0.101	0.094	0.097	0.098	0.093	0.095	0.097	0.105	0.102	0.098	0.096	0.093	0.093	0.097	0.095	0.108	0.095	0.095	0.095	0.096	0.108	0.098	0.096	0.097
03:19:03	0.118	0.11	0.127	0.1	0.134	0.13	0.093	0.097	0.095	0.117	0.101	0.096	0.096	0.094	0.096	0.092	0.119	0.099	0.105	0.096	0.095	0.1	0.096	0.097	0.092	0.101	0.094	0.098	0.098	0.093	0.096	0.098	0.107	0.103	0.1	0.096	0.092	0.093	0.098	0.094	0.111	0.095	0.096	0.095	0.097	0.11	0.098	0.096	0.097
03:29:03	0.124	0.116	0.134	0.101	0.142	0.136	0.093	0.097	0.095	0.121	0.102	0.097	0.096	0.094	0.096	0.092	0.125	0.1	0.107	0.096	0.096	0.102	0.096	0.097	0.092	0.1	0.095	0.099	0.099	0.093	0.096	0.099	0.111	0.105	0.101	0.097	0.092	0.093	0.098	0.095	0.114	0.095	0.096	0.095	0.098	0.114	0.099	0.097	0.098
03:39:03	0.129	0.122	0.139	0.103	0.151	0.143	0.093	0.097	0.095	0.127	0.103	0.098	0.096	0.094	0.096	0.092	0.132	0.101	0.111	0.097	0.097	0.105	0.097	0.098	0.093	0.101	0.095	0.1	0.1	0.093	0.096	0.1	0.115	0.108	0.103	0.098	0.093	0.093	0.098	0.095	0.117	0.096	0.096	0.095	0.098	0.12	0.1	0.098	0.098
03:49:03	0.136	0.127	0.144	0.106	0.159	0.128	0.093	0.097	0.095	0.133	0.104	0.099	0.096	0.094	0.096	0.092	0.14	0.102	0.115	0.098	0.099	0.108	0.098	0.099	0.092	0.101	0.096	0.101	0.101	0.093	0.097	0.101	0.12	0.111	0.106	0.1	0.092	0.093	0.098	0.095	0.12	0.096	0.096	0.095	0.099	0.125	0.1	0.099	0.099
03:59:03	0.143	0.134	0.149	0.108	0.166	0.126	0.094	0.098	0.095	0.14	0.105	0.1	0.096	0.095	0.097	0.093	0.147	0.105	0.119	0.1	0.101	0.112	0.099	0.101	0.093	0.101	0.096	0.102	0.103	0.094	0.098	0.102	0.125	0.115	0.109	0.102	0.093	0.093	0.098	0.096	0.124	0.097	0.097	0.096	0.101	0.132	0.102	0.101	0.1
04:09:03	0.149	0.139	0.15	0.112	0.166	0.131	0.093	0.097	0.095	0.145	0.106	0.102	0.097	0.095	0.097	0.092	0.153	0.107	0.125	0.101	0.103	0.116	0.1	0.102	0.093	0.1	0.096	0.104	0.104	0.094	0.099	0.104	0.132	0.117	0.113	0.104	0.092	0.093	0.099	0.096	0.129	0.097	0.097	0.096	0.103	0.141	0.103	0.102	0.1
04:19:03	0.155	0.144	0.152	0.115	0.175	0.139	0.094	0.098	0.096	0.151	0.108	0.105	0.097	0.096	0.097	0.093	0.161	0.11	0.116	0.103	0.106	0.121	0.101	0.104	0.093	0.101	0.098	0.106	0.107	0.094	0.1	0.106	0.14	0.123	0.117	0.108	0.093	0.094	0.1	0.096	0.132	0.099	0.098	0.097	0.105	0.15	0.105	0.104	0.101
04:29:03	0.163	0.152	0.156	0.121	0.172	0.147	0.094	0.098	0.096	0.158	0.11	0.107	0.098	0.097	0.097	0.093	0.167	0.113	0.12	0.106	0.11	0.127	0.103	0.107	0.094	0.101	0.098	0.107	0.11	0.094	0.1	0.108	0.148	0.129	0.122	0.11	0.093	0.094	0.101	0.095	0.135	0.099	0.099	0.097	0.108	0.161	0.107	0.107	0.102
04:39:03	0.17	0.16	0.158	0.125	0.179	0.155	0.095	0.098	0.096	0.163	0.113	0.111	0.099	0.098	0.097	0.093	0.169	0.117	0.128	0.109	0.115	0.133	0.105	0.11	0.094	0.101	0.099	0.109	0.113	0.094	0.101	0.11	0.158	0.135	0.128	0.115	0.093	0.094	0.102	0.096	0.14	0.101	0.1	0.098	0.112	0.173	0.109	0.11	0.102
04:49:03	0.179	0.168	0.165	0.131	0.185	0.165	0.095	0.098	0.096	0.168	0.116	0.115	0.1	0.099	0.097	0.093	0.173	0.122	0.133	0.113	0.121	0.139	0.108	0.113	0.094	0.101	0.1	0.111	0.117	0.094	0.103	0.11	0.168	0.143	0.132	0.12	0.092	0.093	0.102	0.097	0.146	0.102	0.1	0.099	0.117	0.188	0.112	0.113	0.103
04:59:03	0.187	0.177	0.168	0.137	0.189	0.173	0.096	0.099	0.096	0.17	0.121	0.12	0.101	0.1	0.097	0.093	0.179	0.128	0.141	0.118	0.127	0.148	0.111	0.118	0.095	0.101	0.102	0.114	0.123	0.095	0.105	0.116	0.179	0.152	0.141	0.126	0.093	0.094	0.104	0.1	0.149	0.105	0.101	0.1	0.123	0.204	0.116	0.118	0.105
05:09:03	0.197	0.187	0.173	0.141	0.203	0.183	0.096	0.099	0.097	0.173	0.126	0.126	0.103	0.102	0.097	0.093	0.186	0.135	0.15	0.123	0.134	0.154	0.114	0.123	0.095	0.101	0.104	0.117	0.129	0.096	0.105	0.123	0.189	0.16	0.146	0.132	0.093	0.094	0.105	0.102	0.15	0.107	0.103	0.101	0.131	0.222	0.12	0.122	0.105
05:19:03	0.21	0.197	0.182	0.148	0.218	0.192	0.097	0.1	0.097	0.18	0.132	0.134	0.105	0.104	0.097	0.094	0.192	0.142	0.159	0.128	0.142	0.163	0.119	0.129	0.095	0.102	0.106	0.121	0.135	0.096	0.103	0.104	0.199	0.171	0.155	0.139	0.093	0.094	0.107	0.106	0.156	0.11	0.105	0.102	0.139	0.24	0.125	0.128	0.106
05:29:03	0.222	0.208	0.195	0.153	0.235	0.198	0.099	0.101	0.097	0.185	0.138	0.142	0.108	0.107	0.098	0.094	0.201	0.151	0.168	0.134	0.15	0.173	0.124	0.136	0.096	0.103	0.109	0.125	0.144	0.097	0.105	0.106	0.21	0.181	0.164	0.146	0.093	0.094	0.111	0.109	0.201	0.115	0.107	0.105	0.151	0.262	0.131	0.135	0.108
05:39:03	0.238	0.222	0.201	0.158	0.277	0.203	0.102	0.102	0.097	0.189	0.146	0.15	0.111	0.11	0.098	0.095	0.213	0.159	0.174	0.141	0.158	0.181	0.131	0.144	0.097	0.104	0.114	0.131	0.153	0.098	0.107	0.108	0.221	0.19	0.17	0.153	0.093	0.094	0.114	0.113	0.219	0.119	0.109	0.107	0.162	0.286	0.137	0.142	0.107
05:49:03	0.255	0.239	0.218	0.161	0.543	0.209	0.105	0.103	0.098	0.197	0.155	0.162	0.114	0.114	0.099	0.095	0.226	0.169	0.18	0.147	0.166	0.188	0.138	0.153	0.098	0.102	0.118	0.136	0.164	0.098	0.11	0.112	0.229	0.201	0.179	0.162	0.093	0.094	0.117	0.12	0.233	0.124	0.112	0.111	0.175	0.31	0.145	0.15	0.109
05:59:03	0.275	0.255	0.24	0.168	0.727	0.219	0.109	0.105	0.098	0.249	0.166	0.17	0.118	0.118	0.1	0.095	0.27	0.17	0.183	0.15	0.176	0.198	0.146	0.163	0.099	0.102	0.123	0.143	0.175	0.1	0.112	0.116	0.239	0.213	0.186	0.167	0.093	0.094	0.122	0.127	0.258	0.131	0.116	0.115	0.19	0.335	0.154	0.16	0.112
06:09:03	0.301	0.277	0.253	0.188	0.307	0.23	0.114	0.108	0.099	0.28	0.176	0.181	0.123	0.122	0.1	0.096	0.288	0.163	0.19	0.157	0.185	0.206	0.155	0.174	0.102	0.102	0.129	0.151	0.187	0.102	0.117	0.122	0.25	0.224	0.194	0.174	0.093	0.094	0.128	0.136	0.272	0.137	0.12	0.12	0.207	0.369	0.163	0.17	0.115
06:19:03	0.328	0.298	0.277	0.174	0.344	0.239	0.119	0.111	0.1	0.296	0.187	0.194	0.128	0.126	0.101	0.097	0.311	0.172	0.198	0.161	0.192	0.215	0.164	0.186	0.103	0.103	0.135	0.16	0.199	0.104	0.121	0.128	0.264	0.23	0.206	0.182	0.093	0.094	0.137	0.147	0.296	0.142	0.125	0.124	0.225	0.396	0.173	0.18	0.116
06:29:03	0.358	0.327	0.303	0.447	0.374	0.275	0.127	0.115	0.101	0.3	0.199	0.207	0.134	0.131	0.102	0.098	0.334	0.181	0.21	0.165	0.202	0.223	0.175	0.198	0.106	0.104	0.141	0.168	0.213	0.106	0.127	0.135	0.276	0.243	0.216	0.191	0.093	0.094	0.147	0.158	0.31	0.15	0.13	0.13	0.245	0.427	0.181	0.191	0.118
06:39:03	0.395	0.36	0.343	0.476	0.419	0.298	0.135	0.119	0.102	0.301	0.209	0.217	0.14	0.136	0.104	0.099	0.358	0.192	0.222	0.167	0.21	0.233	0.188	0.211	0.11	0.105	0.148	0.178	0.228	0.109	0.136	0.143	0.286	0.249	0.228	0.198	0.094	0.095	0.153	0.17	0.346	0.157	0.137	0.137	0.264	0.453	0.193	0.203	0.124
06:49:03	0.439	0.398	0.386	0.441	0.465	0.327	0.144	0.124	0.104	0.289	0.223	0.232	0.146	0.143	0.106	0.101	0.383	0.201	0.24	0.195	0.222	0.247	0.201	0.225	0.114	0.107	0.156	0.186	0.244	0.113	0.146	0.152	0.301	0.263	0.239	0.211	0.093	0.095	0.156	0.183	0.39	0.165	0.144	0.143	0.285	0.479	0.204	0.215	0.129
06:59:03	0.481	0.438	0.391	0.333	0.515	0.351	0.154	0.131	0.106	0.315	0.238	0.244	0.16	0.148	0.109	0.103	0.405	0.21	0.28	0.205	0.232	0.257	0.215	0.24	0.118	0.109	0.166	0.161	0.259	0.117	0.156	0.162	0.315	0.28	0.257	0.223	0.093	0.095	0.163	0.194	0.401	0.171	0.152	0.151	0.308	0.513	0.214	0.228	0.137
07:09:03	0.524	0.476	0.417	0.464	0.565	0.4	0.165	0.138	0.109	0.337	0.249	0.26	0.182	0.154	0.112	0.106	0.435	0.223	0.3	0.196	0.243	0.269	0.229	0.254	0.124	0.112	0.173	0.17	0.276	0.122	0.168	0.173	0.335	0.29	0.271	0.237	0.094	0.096	0.171	0.205	0.418	0.179	0.16	0.159	0.332	0.548	0.227	0.239	0.134
07:19:03	0.567	0.521	0.46	0.657	0.61	0.474	0.176	0.146	0.113	0.363	0.265	0.276	0.223	0.164	0.116	0.109	0.467	0.246	0.328	0.209	0.255	0.283	0.243	0.27	0.13	0.115	0.18	0.179	0.294	0.128	0.178	0.184	0.359	0.308	0.296	0.248	0.094	0.096	0.179	0.216	0.456	0.197	0.17	0.168	0.354	0.601	0.24	0.253	0.143
07:29:03	0.616	0.564	0.5	0.639	0.662	0.487	0.189	0.155	0.117	0.389	0.28	0.297	0.231	0.171	0.121	0.113	0.5	0.266	0.356	0.328	0.267	0.3	0.258	0.285	0.136	0.121	0.186	0.188	0.311	0.135	0.191	0.191	0.385	0.326	0.314	0.265	0.094	0.097	0.189	0.228	0.479	0.216	0.179	0.177	0.377	0.656	0.254	0.267	0.151
07:39:03	0.666	0.612	0.533	0.299	0.709	0.473	0.2	0.161	0.122	0.423	0.299	0.315	0.188	0.184	0.128	0.117	0.535	0.289	0.395	0.397	0.283	0.315	0.275	0.3	0.144	0.126	0.19	0.192	0.328	0.142	0.205	0.201	0.416	0.344	0.337	0.286	0.094	0.097	0.199	0.234	0.521	0.254	0.188	0.186	0.4	0.725	0.271	0.283	0.16
07:49:03	0.711	0.66	0.559	0.426	0.757	0.532	0.212	0.17	0.126	0.457	0.319	0.339	0.206	0.193	0.135	0.123	0.567	0.315	0.441	0.407	0.3	0.334	0.289	0.315	0.153	0.132	0.183	0.203	0.348	0.152	0.22	0.213	0.448	0.368	0.355	0.302	0.095	0.098	0.208	0.252	0.562	0.286	0.198	0.197	0.427	0.804	0.286	0.299	0.167
07:59:03	0.753	0.703	0.604	0.56	0.803	0.58	0.223	0.176	0.132	0.486	0.339	0.362	0.214	0.205	0.143	0.13	0.6	0.342	0.468	0.421	0.316	0.354	0.304	0.33	0.169	0.139	0.188	0.212	0.366	0.162	0.234	0.229	0.488	0.398	0.384	0.331	0.095	0.099	0.226	0.269	0.601	0.308	0.203	0.207	0.453	0.889	0.304	0.315	0.176
08:09:03	0.79	0.745	0.634	0.519	0.846	0.626	0.238	0.185	0.139	0.519	0.364	0.39	0.236	0.226	0.151	0.136	0.634	0.369	0.516	0.471	0.334	0.378	0.32	0.346	0.157	0.145	0.199	0.22	0.39	0.173	0.252	0.238	0.521	0.429	0.412	0.347	0.096	0.1	0.236	0.287	0.636	0.341	0.212	0.218	0.49	0.971	0.322	0.337	0.186
08:19:03	0.824	0.78	0.684	0.569	0.883	0.668	0.254	0.197	0.147	0.554	0.39	0.42	0.253	0.244	0.16	0.144	0.673	0.406	0.563	0.526	0.354	0.401	0.335	0.362	0.161	0.152	0.212	0.223	0.415	0.185	0.271	0.257	0.564	0.464	0.444	0.377	0.096	0.101	0.258	0.312	0.679	0.364	0.224	0.228	0.53	1.055	0.34	0.357	0.194
08:29:03	0.859	0.813	0.716	0.615	0.916	0.721	0.273	0.208	0.156	0.595	0.422	0.447	0.276	0.253	0.162	0.146	0.709	0.438	0.587	0.379	0.38	0.424	0.35	0.378	0.166	0.158	0.223	0.239	0.44	0.199	0.294	0.277	0.606	0.503	0.472	0.406	0.097	0.103	0.282	0.352	0.715	0.39	0.236	0.238	0.581	1.124	0.359	0.382	0.209
08:39:03	0.892	0.845	0.739	0.659	0.948	0.763	0.294	0.22	0.166	0.634	0.45	0.478	0.295	0.287	0.172	0.152	0.746	0.47	0.634	0.429	0.408	0.458	0.367	0.396	0.171	0.168	0.235	0.253	0.469	0.212	0.319	0.296	0.651	0.544	0.5	0.433	0.098	0.105	0.312	0.382	0.754	0.426	0.248	0.246	0.643	1.196	0.389	0.41	0.215
08:49:03	0.926	0.877	0.752	0.71	0.975	0.805	0.313	0.234	0.178	0.672	0.475	0.506	0.439	0.322	0.183	0.158	0.78	0.505	0.678	0.474	0.433	0.487	0.384	0.414	0.171	0.176	0.25	0.269	0.501	0.228	0.343	0.318	0.711	0.598	0.529	0.466	0.099	0.107	0.334	0.406	0.787	0.459	0.262	0.259	0.709	1.254	0.416	0.441	0.244
08:59:03	0.954	0.908	0.77	0.759	1	0.847	0.34	0.253	0.189	0.707	0.507	0.534	0.465	0.37	0.194	0.163	0.813	0.544	0.722	0.525	0.462	0.518	0.401	0.433	0.166	0.184	0.269	0.286	0.533	0.245	0.372	0.343	0.775	0.644	0.567	0.488	0.1	0.109	0.369	0.434	0.824	0.506	0.276	0.273	0.776	1.3	0.446	0.475	0.239
09:09:03	0.984	0.937	0.802	0.801	1.024	0.883	0.37	0.274	0.198	0.747	0.536	0.57	0.62	0.378	0.204	0.164	0.846	0.589	0.764	0.573	0.491	0.554	0.419	0.454	0.176	0.186	0.293	0.309	0.57	0.263	0.394	0.368	0.848	0.696	0.603	0.521	0.102	0.111	0.394	0.467	0.854	0.55	0.291	0.284	0.849	1.34	0.485	0.517	0.247
09:19:03	1.011	0.966	0.835	0.854	1.046	0.917	0.398	0.299	0.206	0.782	0.563	0.6	0.414	0.42	0.209	0.168	0.877	0.627	0.804	0.616	0.525	0.595	0.44	0.477	0.19	0.195	0.315	0.33	0.605	0.28	0.427	0.395	0.914	0.754	0.635	0.553	0.104	0.114	0.423	0.493	0.885	0.587	0.302	0.299	0.926	1.369	0.527	0.56	0.268
09:29:03	1.035	0.991	0.856	0.935	1.068	0.949	0.427	0.321	0.213	0.819	0.594	0.632	0.479	0.439	0.214	0.17	0.905	0.668	0.84	0.668	0.564	0.63	0.461	0.5	0.205	0.191	0.343	0.352	0.643	0.299	0.459	0.422	0.98	0.813	0.672	0.586	0.105	0.117	0.455	0.527	0.913	0.626	0.31	0.315	1.006	1.392	0.574	0.607	0.283
09:39:03	1.057	1.015	0.878	0.994	1.087	0.977	0.461	0.346	0.227	0.855	0.627	0.669	0.497	0.436	0.227	0.185	0.933	0.709	0.871	0.715	0.6	0.666	0.482	0.524	0.224	0.196	0.372	0.377	0.679	0.319	0.491	0.452	1.043	0.876	0.709	0.618	0.108	0.12	0.488	0.56	0.94	0.665	0.326	0.332	1.081	1.41	0.622	0.655	0.303
09:49:03	1.077	1.036	0.902	1.005	1.105	1.002	0.494	0.373	0.248	0.886	0.663	0.704	0.559	0.525	0.234	0.188	0.959	0.749	0.901	0.759	0.636	0.702	0.505	0.551	0.24	0.205	0.407	0.402	0.72	0.34	0.524	0.479	1.103	0.937	0.747	0.652	0.11	0.125	0.537	0.595	0.967	0.705	0.341	0.351	1.154	1.425	0.67	0.706	0.334
09:59:03	1.093	1.054	0.919	1.053	1.121	1.026	0.529	0.405	0.264	0.916	0.698	0.737	0.603	0.51	0.247	0.202	0.983	0.79	0.926	0.802	0.672	0.738	0.527	0.577	0.261	0.219	0.442	0.429	0.762	0.36	0.558	0.512	1.16	0.999	0.794	0.685	0.113	0.129	0.572	0.63	0.989	0.744	0.356	0.367	1.218	1.436	0.723	0.761	0.368
10:09:03	1.108	1.07	0.939	1.086	1.136	1.048	0.562	0.432	0.293	0.945	0.726	0.77	0.651	0.538	0.264	0.217	1.004	0.829	0.953	0.837	0.705	0.77	0.552	0.607	0.287	0.249	0.479	0.459	0.804	0.383	0.593	0.545	1.212	1.057	0.837	0.723	0.116	0.133	0.603	0.666	1.011	0.782	0.375	0.384	1.281	1.446	0.769	0.806	0.407
10:19:03	1.124	1.087	0.955	1.121	1.15	1.067	0.597	0.466	0.322	0.969	0.763	0.803	0.698	0.589	0.285	0.237	1.025	0.864	0.975	0.872	0.737	0.798	0.577	0.639	0.311	0.273	0.516	0.49	0.845	0.407	0.63	0.578	1.256	1.109	0.876	0.763	0.119	0.139	0.634	0.697	1.033	0.824	0.396	0.404	1.335	1.457	0.816	0.856	0.411
10:29:03	1.139	1.102	0.975	1.145	1.16	1.088	0.635	0.5	0.35	0.99	0.794	0.835	0.739	0.6	0.309	0.253	1.039	0.895	0.995	0.901	0.769	0.826	0.602	0.672	0.338	0.302	0.56	0.522	0.885	0.434	0.669	0.617	1.298	1.158	0.912	0.802	0.122	0.145	0.678	0.733	1.051	0.855	0.413	0.43	1.382	1.466	0.867	0.903	0.437
10:39:03	1.15	1.113	0.989	1.165	1.17	1.105	0.67	0.531	0.377	1.01	0.827	0.864	0.783	0.671	0.334	0.285	1.053	0.926	1.012	0.926	0.795	0.85	0.63	0.702	0.372	0.332	0.601	0.555	0.926	0.459	0.706	0.651	1.332	1.2	0.944	0.843	0.126	0.151	0.71	0.767	1.066	0.882	0.435	0.446	1.42	1.474	0.913	0.951	0.47
10:49:03	1.161	1.127	1.003	1.182	1.179	1.122	0.706	0.567	0.41	1.024	0.857	0.895	0.843	0.715	0.357	0.303	1.066	0.954	1.029	0.949	0.82	0.876	0.657	0.735	0.4	0.359	0.648	0.591	0.967	0.486	0.741	0.688	1.364	1.235	0.983	0.883	0.129	0.158	0.744	0.8	1.079	0.908	0.463	0.472	1.452	1.481	0.953	0.996	0.501
10:59:03	1.171	1.137	1.015	1.199	1.186	1.136	0.742	0.602	0.441	1.039	0.884	0.922	0.875	0.759	0.39	0.335	1.076	0.98	1.045	0.97	0.844	0.9	0.686	0.771	0.431	0.39	0.691	0.628	1.005	0.515	0.778	0.724	1.386	1.27	1.008	0.919	0.133	0.166	0.779	0.833	1.089	0.934	0.487	0.498	1.478	1.486	0.989	1.036	0.53
11:09:03	1.18	1.147	1.022	1.212	1.191	1.149	0.775	0.638	0.474	1.051	0.911	0.948	0.903	0.813	0.423	0.361	1.087	1.004	1.057	0.988	0.868	0.924	0.72	0.808	0.463	0.419	0.738	0.664	1.038	0.544	0.815	0.761	1.406	1.299	1.032	0.95	0.138	0.174	0.811	0.866	1.098	0.958	0.517	0.527	1.501	1.492	1.028	1.073	0.562
11:19:03	1.185	1.153	1.029	1.222	1.196	1.161	0.813	0.673	0.513	1.061	0.937	0.974	0.927	0.85	0.447	0.396	1.095	1.026	1.068	1.004	0.891	0.945	0.752	0.851	0.497	0.452	0.779	0.699	1.071	0.574	0.851	0.797	1.422	1.323	1.054	0.977	0.142	0.183	0.842	0.896	1.107	0.981	0.543	0.554	1.521	1.495	1.062	1.108	0.585
11:29:03	1.191	1.161	1.032	1.231	1.198	1.171	0.846	0.713	0.551	1.07	0.96	0.998	0.952	0.878	0.498	0.435	1.104	1.045	1.079	1.021	0.913	0.963	0.788	0.895	0.53	0.49	0.825	0.736	1.101	0.605	0.886	0.833	1.434	1.345	1.074	1.002	0.147	0.194	0.871	0.922	1.114	1.002	0.572	0.584	1.537	1.499	1.092	1.141	0.622
11:39:03	1.201	1.165	1.028	1.238	1.2	1.178	0.878	0.748	0.592	1.079	0.983	1.021	0.98	0.912	0.548	0.678	1.11	1.06	1.088	1.04	0.931	0.98	0.821	0.932	0.565	0.529	0.869	0.773	1.134	0.639	0.919	0.869	1.446	1.362	1.093	1.028	0.153	0.206	0.899	0.947	1.123	1.021	0.604	0.62	1.55	1.504	1.121	1.169	0.654
11:49:03	1.204	1.17	1.029	1.245	1.204	1.185	0.909	0.785	0.635	1.085	1.005	1.044	0.998	0.926	0.578	0.743	1.115	1.077	1.096	1.055	0.948	0.995	0.864	0.974	0.599	0.565	0.909	0.809	1.168	0.673	0.952	0.903	1.454	1.377	1.111	1.05	0.16	0.222	0.923	0.968	1.129	1.037	0.636	0.652	1.562	1.509	1.147	1.196	0.681
11:59:03	1.206	1.174	1.027	1.248	1.205	1.191	0.938	0.82	0.677	1.092	1.027	1.064	1.019	0.951	0.614	0.782	1.119	1.09	1.103	1.067	0.961	1.005	0.903	1.014	0.64	0.602	0.949	0.846	1.198	0.707	0.979	0.935	1.461	1.39	1.127	1.072	0.166	0.238	0.947	0.986	1.136	1.051	0.669	0.69	1.573	1.514	1.173	1.219	0.711
12:09:03	1.21	1.177	1.028	1.254	1.206	1.195	0.964	0.854	0.718	1.097	1.046	1.086	1.037	0.971	0.656	0.822	1.122	1.1	1.109	1.078	0.971	1.012	0.944	1.05	0.677	0.645	0.987	0.884	1.221	0.744	1.002	0.965	1.469	1.399	1.143	1.093	0.174	0.256	0.968	1.002	1.142	1.062	0.703	0.729	1.579	1.518	1.195	1.241	0.738
12:19:03	1.212	1.179	1.028	1.258	1.206	1.198	0.985	0.886	0.756	1.101	1.065	1.104	1.053	0.987	0.689	0.861	1.125	1.108	1.114	1.089	0.977	1.02	0.982	1.093	0.718	0.688	1.021	0.915	1.239	0.783	1.024	0.989	1.474	1.408	1.157	1.109	0.183	0.275	0.982	1.017	1.146	1.072	0.738	0.765	1.587	1.523	1.214	1.259	0.762
12:29:03	1.215	1.183	1.029	1.261	1.207	1.2	1.005	0.916	0.797	1.104	1.081	1.119	1.067	1.004	0.735	0.899	1.126	1.116	1.117	1.098	0.982	1.024	1.018	1.129	0.754	0.726	1.054	0.946	1.253	0.823	1.044	1.012	1.479	1.415	1.171	1.124	0.193	0.294	0.994	1.029	1.15	1.081	0.776	0.804	1.594	1.527	1.231	1.276	0.784
12:39:03	1.219	1.184	1.029	1.263	1.207	1.201	1.021	0.943	0.84	1.107	1.095	1.134	1.081	1.021	0.782	0.934	1.128	1.124	1.121	1.103	0.986	1.027	1.057	1.164	0.792	0.768	1.081	0.976	1.265	0.859	1.062	1.033	1.485	1.421	1.185	1.142	0.205	0.316	1.006	1.038	1.154	1.09	0.813	0.843	1.599	1.532	1.247	1.291	0.805
12:49:03	1.222	1.188	1.031	1.266	1.207	1.204	1.036	0.966	0.878	1.109	1.111	1.153	1.094	1.038	0.823	0.968	1.129	1.129	1.126	1.111	0.99	1.032	1.094	1.198	0.831	0.81	1.104	1.005	1.275	0.9	1.079	1.052	1.489	1.428	1.195	1.158	0.217	0.338	1.015	1.049	1.158	1.099	0.851	0.88	1.603	1.535	1.262	1.304	0.827
12:59:03	1.226	1.19	1.029	1.267	1.208	1.205	1.049	0.987	0.915	1.11	1.125	1.166	1.105	1.049	0.872	0.997	1.132	1.135	1.129	1.116	0.992	1.034	1.127	1.23	0.869	0.851	1.125	1.027	1.284	0.939	1.094	1.071	1.494	1.433	1.206	1.171	0.231	0.362	1.025	1.057	1.162	1.106	0.888	0.919	1.608	1.54	1.274	1.315	0.847
13:09:03	1.229	1.194	1.033	1.266	1.207	1.206	1.059	1.002	0.948	1.11	1.137	1.177	1.114	1.063	0.906	1.026	1.133	1.138	1.13	1.121	0.993	1.033	1.162	1.254	0.903	0.889	1.144	1.046	1.292	0.973	1.105	1.086	1.496	1.438	1.212	1.185	0.247	0.386	1.032	1.064	1.164	1.113	0.925	0.956	1.611	1.542	1.287	1.326	0.865
13:19:03	1.232	1.196	1.028	1.268	1.206	1.206	1.069	1.018	0.979	1.11	1.148	1.186	1.12	1.072	0.949	1.055	1.133	1.141	1.133	1.124	0.993	1.033	1.195	1.28	0.936	0.924	1.159	1.064	1.3	1.01	1.115	1.1	1.499	1.442	1.22	1.195	0.265	0.411	1.038	1.071	1.168	1.119	0.962	0.991	1.613	1.545	1.298	1.336	0.88
13:29:03	1.234	1.199	1.028	1.268	1.206	1.206	1.078	1.03	1.008	1.111	1.154	1.191	1.125	1.079	0.977	1.082	1.135	1.143	1.133	1.128	0.992	1.031	1.226	1.302	0.969	0.957	1.175	1.079	1.307	1.044	1.124	1.109	1.5	1.444	1.226	1.204	0.282	0.437	1.045	1.077	1.17	1.124	0.997	1.022	1.615	1.548	1.307	1.345	0.894
13:39:03	1.236	1.2	1.03	1.268	1.204	1.206	1.083	1.041	1.034	1.11	1.161	1.201	1.127	1.083	1	1.107	1.136	1.145	1.136	1.131	0.992	1.027	1.253	1.323	0.998	0.992	1.187	1.094	1.314	1.078	1.132	1.119	1.501	1.446	1.232	1.213	0.299	0.466	1.051	1.081	1.174	1.129	1.03	1.052	1.617	1.551	1.315	1.352	0.906
13:49:03	1.239	1.203	1.03	1.268	1.204	1.205	1.089	1.051	1.056	1.111	1.17	1.206	1.132	1.087	1.024	1.129	1.137	1.146	1.137	1.133	0.993	1.029	1.276	1.342	1.024	1.022	1.196	1.106	1.32	1.111	1.138	1.125	1.5	1.449	1.238	1.221	0.317	0.496	1.057	1.085	1.176	1.134	1.058	1.077	1.62	1.556	1.325	1.362	0.917
13:59:03	1.242	1.206	1.03	1.271	1.202	1.206	1.092	1.059	1.076	1.111	1.176	1.213	1.134	1.093	1.047	1.151	1.138	1.147	1.139	1.134	0.992	1.03	1.299	1.357	1.047	1.05	1.203	1.118	1.325	1.146	1.145	1.132	1.501	1.448	1.243	1.228	0.335	0.527	1.06	1.089	1.178	1.137	1.085	1.101	1.622	1.558	1.332	1.37	0.926
14:09:03	1.244	1.209	1.028	1.27	1.2	1.206	1.095	1.067	1.091	1.111	1.181	1.218	1.138	1.094	1.069	1.169	1.138	1.149	1.14	1.137	0.992	1.031	1.321	1.371	1.069	1.075	1.208	1.126	1.329	1.179	1.15	1.138	1.501	1.449	1.246	1.234	0.356	0.563	1.063	1.091	1.18	1.142	1.107	1.119	1.624	1.559	1.34	1.378	0.934
14:19:03	1.244	1.21	1.027	1.27	1.198	1.204	1.098	1.073	1.105	1.111	1.187	1.223	1.139	1.095	1.086	1.184	1.138	1.151	1.142	1.138	0.992	1.032	1.337	1.386	1.087	1.096	1.214	1.133	1.334	1.21	1.154	1.145	1.501	1.449	1.25	1.24	0.379	0.601	1.066	1.094	1.183	1.144	1.128	1.136	1.625	1.559	1.347	1.385	0.94
14:29:03	1.246	1.211	1.025	1.271	1.196	1.203	1.1	1.079	1.115	1.11	1.191	1.227	1.143	1.095	1.101	1.198	1.138	1.151	1.142	1.14	0.993	1.032	1.353	1.394	1.102	1.11	1.216	1.137	1.338	1.239	1.159	1.148	1.5	1.45	1.252	1.244	0.403	0.645	1.067	1.095	1.184	1.147	1.143	1.153	1.628	1.561	1.354	1.391	0.946
14:39:03	1.248	1.214	1.025	1.273	1.196	1.203	1.102	1.082	1.127	1.111	1.198	1.23	1.144	1.097	1.115	1.209	1.139	1.152	1.144	1.142	0.994	1.034	1.369	1.404	1.115	1.125	1.221	1.141	1.343	1.262	1.163	1.154	1.5	1.451	1.256	1.249	0.43	0.695	1.071	1.097	1.185	1.15	1.16	1.166	1.63	1.562	1.36	1.397	0.951
14:49:03	1.249	1.215	1.023	1.274	1.194	1.202	1.104	1.086	1.136	1.111	1.202	1.235	1.144	1.099	1.125	1.218	1.139	1.153	1.145	1.142	0.995	1.035	1.38	1.413	1.126	1.138	1.223	1.145	1.345	1.279	1.167	1.157	1.5	1.45	1.259	1.253	0.455	0.744	1.071	1.099	1.188	1.153	1.172	1.177	1.63	1.564	1.367	1.401	0.956
14:59:03	1.25	1.217	1.023	1.274	1.192	1.2	1.104	1.088	1.144	1.11	1.205	1.239	1.143	1.101	1.133	1.227	1.139	1.154	1.145	1.143	0.994	1.035	1.389	1.42	1.134	1.149	1.226	1.146	1.349	1.293	1.17	1.162	1.5	1.45	1.26	1.257	0.482	0.799	1.071	1.1	1.185	1.155	1.184	1.188	1.631	1.564	1.372	1.406	0.961
15:09:03	1.25	1.218	1.021	1.274	1.19	1.198	1.106	1.09	1.151	1.11	1.21	1.243	1.144	1.101	1.141	1.234	1.139	1.154	1.146	1.144	0.995	1.036	1.4	1.427	1.143	1.161	1.228	1.149	1.351	1.303	1.174	1.166	1.5	1.449	1.262	1.26	0.512	0.859	1.073	1.1	1.188	1.158	1.193	1.194	1.631	1.566	1.377	1.409	0.964
15:19:03	1.25	1.219	1.018	1.275	1.19	1.195	1.105	1.092	1.157	1.11	1.213	1.245	1.145	1.101	1.148	1.242	1.139	1.153	1.146	1.145	0.995	1.035	1.407	1.433	1.151	1.169	1.231	1.15	1.354	1.313	1.178	1.169	1.499	1.451	1.264	1.263	0.547	0.924	1.075	1.1	1.187	1.159	1.2	1.201	1.631	1.567	1.382	1.411	0.966
15:29:03	1.252	1.22	1.009	1.275	1.189	1.194	1.106	1.093	1.162	1.109	1.215	1.249	1.147	1.103	1.152	1.248	1.139	1.154	1.148	1.146	0.996	1.035	1.414	1.437	1.159	1.177	1.234	1.153	1.356	1.321	1.18	1.173	1.499	1.449	1.266	1.265	0.584	0.983	1.076	1.102	1.188	1.16	1.206	1.205	1.631	1.569	1.387	1.412	0.968
15:39:03	1.252	1.222	1.007	1.274	1.186	1.194	1.106	1.093	1.165	1.109	1.216	1.25	1.147	1.102	1.158	1.254	1.139	1.154	1.148	1.147	0.995	1.035	1.421	1.442	1.163	1.183	1.236	1.155	1.359	1.328	1.184	1.176	1.498	1.449	1.267	1.267	0.622	1.045	1.077	1.101	1.186	1.162	1.211	1.209	1.632	1.568	1.39	1.409	0.971
15:49:03	1.251	1.223	1.006	1.274	1.186	1.192	1.107	1.094	1.168	1.108	1.219	1.255	1.148	1.102	1.162	1.258	1.139	1.153	1.149	1.148	0.995	1.036	1.427	1.446	1.167	1.187	1.239	1.156	1.361	1.335	1.187	1.178	1.498	1.451	1.267	1.269	0.666	1.107	1.078	1.103	1.182	1.16	1.215	1.212	1.633	1.569	1.392	1.407	0.973
15:59:03	1.252	1.223	1	1.275	1.186	1.189	1.108	1.095	1.17	1.107	1.22	1.258	1.148	1.102	1.165	1.262	1.137	1.153	1.149	1.149	0.995	1.035	1.432	1.447	1.172	1.192	1.24	1.157	1.363	1.341	1.19	1.182	1.498	1.449	1.268	1.271	0.713	1.166	1.079	1.103	1.179	1.161	1.218	1.215	1.632	1.569	1.384	1.408	0.975
16:09:03	1.25	1.224	1	1.276	1.184	1.189	1.107	1.095	1.17	1.107	1.223	1.262	1.149	1.101	1.169	1.265	1.138	1.152	1.15	1.149	0.996	1.034	1.435	1.449	1.174	1.196	1.243	1.158	1.364	1.347	1.192	1.184	1.498	1.449	1.27	1.272	0.767	1.219	1.079	1.103	1.179	1.161	1.219	1.216	1.634	1.564	1.386	1.407	0.977
16:19:03	1.249	1.224	0.997	1.276	1.183	1.188	1.106	1.096	1.171	1.106	1.224	1.261	1.149	1.101	1.171	1.267	1.137	1.153	1.15	1.149	0.996	1.035	1.438	1.449	1.178	1.201	1.244	1.158	1.367	1.351	1.194	1.187	1.498	1.449	1.27	1.274	0.819	1.267	1.079	1.103	1.179	1.16	1.221	1.218	1.633	1.556	1.385	1.408	0.978
16:29:03	1.25	1.224	0.999	1.276	1.182	1.185	1.107	1.096	1.171	1.105	1.228	1.27	1.149	1.102	1.173	1.271	1.138	1.152	1.149	1.15	0.995	1.033	1.443	1.451	1.181	1.205	1.245	1.16	1.368	1.356	1.197	1.189	1.497	1.45	1.271	1.274	0.883	1.315	1.08	1.103	1.177	1.159	1.222	1.219	1.632	1.553	1.383	1.407	0.979
16:39:03	1.248	1.224	0.997	1.277	1.182	1.186	1.107	1.097	1.172	1.105	1.232	1.274	1.149	1.101	1.173	1.273	1.138	1.152	1.151	1.151	0.995	1.033	1.443	1.451	1.185	1.209	1.247	1.16	1.37	1.36	1.2	1.191	1.496	1.449	1.272	1.276	0.944	1.355	1.08	1.103	1.174	1.159	1.224	1.219	1.632	1.551	1.384	1.408	0.981
16:49:03	1.246	1.225	0.995	1.276	1.181	1.184	1.107	1.097	1.173	1.104	1.238	1.277	1.149	1.101	1.175	1.276	1.138	1.151	1.152	1.152	0.996	1.033	1.444	1.451	1.188	1.213	1.248	1.162	1.372	1.364	1.202	1.194	1.495	1.449	1.273	1.277	1.002	1.394	1.08	1.103	1.174	1.158	1.224	1.22	1.631	1.549	1.383	1.408	0.981
16:59:03	1.246	1.226	0.994	1.275	1.181	1.183	1.108	1.097	1.175	1.103	1.239	1.282	1.15	1.1	1.175	1.277	1.137	1.151	1.154	1.153	0.994	1.032	1.445	1.452	1.191	1.217	1.249	1.161	1.373	1.367	1.203	1.195	1.496	1.449	1.273	1.279	1.065	1.428	1.08	1.103	1.173	1.158	1.225	1.221	1.629	1.546	1.381	1.407	0.982
17:09:03	1.245	1.223	0.992	1.277	1.18	1.183	1.107	1.097	1.175	1.102	1.244	1.291	1.149	1.1	1.174	1.28	1.136	1.15	1.154	1.153	0.993	1.031	1.445	1.45	1.194	1.219	1.25	1.163	1.374	1.37	1.204	1.197	1.495	1.449	1.273	1.279	1.118	1.458	1.081	1.103	1.173	1.154	1.226	1.22	1.628	1.545	1.382	1.406	0.983
17:19:03	1.245	1.225	0.988	1.279	1.18	1.184	1.107	1.097	1.174	1.101	1.251	1.294	1.149	1.098	1.176	1.28	1.137	1.149	1.157	1.153	0.994	1.03	1.445	1.451	1.196	1.222	1.251	1.163	1.375	1.373	1.206	1.199	1.496	1.45	1.274	1.28	1.179	1.486	1.081	1.103	1.172	1.154	1.226	1.221	1.627	1.523	1.382	1.404	0.984
17:29:03	1.245	1.227	0.986	1.277	1.181	1.183	1.107	1.097	1.174	1.102	1.26	1.306	1.149	1.098	1.176	1.282	1.136	1.149	1.158	1.154	0.993	1.031	1.445	1.45	1.199	1.225	1.252	1.164	1.377	1.376	1.207	1.199	1.495	1.45	1.275	1.281	1.232	1.512	1.081	1.103	1.172	1.153	1.225	1.221	1.626	1.517	1.383	1.406	0.985
17:39:03	1.246	1.228	0.984	1.278	1.181	1.183	1.106	1.097	1.174	1.101	1.274	1.318	1.149	1.097	1.176	1.283	1.137	1.147	1.159	1.154	0.994	1.031	1.444	1.448	1.201	1.227	1.252	1.165	1.378	1.378	1.209	1.201	1.495	1.45	1.276	1.283	1.283	1.533	1.081	1.103	1.172	1.151	1.226	1.221	1.623	1.516	1.381	1.408	0.985
17:49:03	1.246	1.229	0.982	1.28	1.18	1.184	1.106	1.098	1.174	1.101	1.286	1.329	1.149	1.097	1.177	1.285	1.137	1.149	1.158	1.155	0.993	1.03	1.444	1.447	1.202	1.23	1.252	1.169	1.379	1.38	1.21	1.203	1.494	1.446	1.276	1.283	1.327	1.551	1.082	1.102	1.172	1.147	1.226	1.221	1.622	1.507	1.381	1.407	0.984
17:59:03	1.245	1.231	0.981	1.279	1.18	1.185	1.105	1.097	1.174	1.1	1.307	1.337	1.15	1.097	1.175	1.286	1.137	1.148	1.158	1.154	0.993	1.028	1.443	1.446	1.204	1.231	1.253	1.17	1.377	1.382	1.211	1.204	1.494	1.447	1.277	1.284	1.371	1.566	1.082	1.103	1.172	1.144	1.226	1.221	1.617	1.497	1.381	1.407	0.985
18:09:03	1.246	1.231	0.978	1.28	1.182	1.184	1.105	1.097	1.172	1.1	1.316	1.359	1.15	1.097	1.175	1.287	1.137	1.147	1.158	1.155	0.993	1.026	1.441	1.444	1.205	1.233	1.253	1.171	1.374	1.384	1.212	1.203	1.493	1.447	1.277	1.286	1.41	1.578	1.081	1.102	1.171	1.145	1.226	1.221	1.607	1.503	1.381	1.405	0.986
18:19:03	1.25	1.232	0.976	1.281	1.18	1.184	1.104	1.097	1.171	1.1	1.324	1.368	1.149	1.096	1.175	1.288	1.137	1.147	1.158	1.155	0.994	1.026	1.44	1.443	1.207	1.233	1.253	1.171	1.371	1.385	1.212	1.203	1.492	1.448	1.277	1.285	1.445	1.587	1.082	1.102	1.17	1.143	1.226	1.22	1.608	1.492	1.379	1.404	0.986
18:29:03	1.256	1.236	0.977	1.281	1.181	1.183	1.104	1.096	1.171	1.099	1.335	1.361	1.15	1.097	1.175	1.289	1.136	1.147	1.158	1.155	0.994	1.026	1.438	1.442	1.207	1.232	1.253	1.17	1.372	1.387	1.213	1.205	1.492	1.447	1.279	1.287	1.478	1.596	1.081	1.102	1.17	1.142	1.227	1.221	1.607	1.498	1.379	1.404	0.985
18:39:03	1.258	1.242	0.974	1.283	1.182	1.184	1.103	1.096	1.17	1.099	1.344	1.376	1.15	1.098	1.173	1.29	1.136	1.146	1.157	1.155	0.994	1.028	1.437	1.44	1.207	1.234	1.253	1.17	1.369	1.389	1.214	1.204	1.492	1.446	1.278	1.288	1.506	1.604	1.081	1.102	1.17	1.143	1.226	1.22	1.607	1.494	1.378	1.402	0.986
18:49:03	1.267	1.248	0.972	1.283	1.181	1.183	1.103	1.096	1.169	1.099	1.36	1.381	1.15	1.097	1.173	1.291	1.136	1.146	1.158	1.155	0.994	1.027	1.437	1.44	1.207	1.234	1.253	1.171	1.369	1.39	1.212	1.206	1.49	1.447	1.279	1.288	1.53	1.611	1.08	1.102	1.169	1.141	1.226	1.22	1.6	1.49	1.377	1.403	0.986
18:59:03	1.27	1.254	0.973	1.283	1.183	1.183	1.102	1.096	1.168	1.098	1.362	1.385	1.15	1.098	1.171	1.292	1.136	1.146	1.158	1.155	0.995	1.027	1.434	1.439	1.207	1.235	1.253	1.171	1.369	1.392	1.213	1.206	1.491	1.447	1.279	1.288	1.551	1.616	1.081	1.101	1.17	1.142	1.226	1.22	1.596	1.498	1.379	1.403	0.984
19:09:03	1.276	1.261	0.971	1.283	1.184	1.18	1.102	1.095	1.168	1.097	1.37	1.396	1.149	1.099	1.171	1.293	1.136	1.147	1.158	1.156	0.996	1.026	1.435	1.438	1.206	1.236	1.253	1.171	1.369	1.393	1.214	1.206	1.49	1.447	1.28	1.29	1.571	1.623	1.081	1.102	1.169	1.144	1.226	1.22	1.593	1.502	1.375	1.4	0.983
19:19:03	1.285	1.266	0.968	1.284	1.186	1.18	1.101	1.095	1.167	1.098	1.373	1.393	1.15	1.099	1.17	1.294	1.136	1.152	1.158	1.156	0.997	1.028	1.433	1.437	1.205	1.234	1.254	1.171	1.371	1.394	1.215	1.208	1.489	1.447	1.28	1.29	1.586	1.629	1.081	1.101	1.169	1.144	1.226	1.219	1.592	1.501	1.375	1.404	0.98
19:29:03	1.295	1.277	0.969	1.285	1.188	1.181	1.101	1.095	1.167	1.099	1.39	1.408	1.15	1.099	1.17	1.294	1.137	1.153	1.158	1.156	0.999	1.029	1.433	1.436	1.204	1.234	1.254	1.171	1.371	1.395	1.214	1.208	1.488	1.445	1.281	1.291	1.596	1.635	1.081	1.101	1.169	1.142	1.225	1.219	1.57	1.511	1.379	1.403	0.98
19:39:03	1.301	1.283	0.968	1.286	1.189	1.182	1.101	1.094	1.166	1.097	1.407	1.454	1.15	1.098	1.17	1.295	1.135	1.152	1.158	1.156	1	1.031	1.432	1.435	1.203	1.233	1.254	1.172	1.371	1.396	1.214	1.22	1.485	1.444	1.281	1.291	1.604	1.64	1.08	1.1	1.17	1.142	1.224	1.217	1.573	1.524	1.38	1.405	0.98
19:49:03	1.305	1.288	0.966	1.287	1.19	1.185	1.1	1.094	1.165	1.097	1.419	1.464	1.15	1.1	1.168	1.295	1.136	1.154	1.157	1.156	1.002	1.033	1.431	1.434	1.204	1.231	1.254	1.172	1.365	1.397	1.214	1.221	1.483	1.444	1.282	1.292	1.611	1.646	1.079	1.1	1.171	1.144	1.223	1.218	1.561	1.539	1.382	1.405	0.979
19:59:03	1.309	1.295	0.964	1.287	1.188	1.184	1.1	1.093	1.165	1.097	1.435	1.464	1.15	1.1	1.166	1.296	1.135	1.155	1.157	1.158	1.006	1.036	1.43	1.434	1.201	1.231	1.254	1.171	1.357	1.398	1.216	1.221	1.483	1.444	1.281	1.292	1.619	1.653	1.08	1.1	1.171	1.143	1.224	1.217	1.567	1.557	1.385	1.407	0.978
20:09:03	1.315	1.302	0.965	1.291	1.187	1.183	1.1	1.093	1.165	1.095	1.456	1.482	1.151	1.099	1.163	1.296	1.135	1.156	1.156	1.157	1.009	1.039	1.429	1.433	1.202	1.231	1.254	1.171	1.346	1.399	1.216	1.222	1.482	1.443	1.283	1.292	1.623	1.658	1.08	1.1	1.17	1.143	1.223	1.217	1.562	1.572	1.387	1.407	0.977
20:19:03	1.322	1.307	0.961	1.29	1.184	1.184	1.099	1.092	1.163	1.095	1.47	1.495	1.151	1.1	1.162	1.297	1.135	1.156	1.157	1.158	1.012	1.042	1.429	1.433	1.201	1.23	1.254	1.173	1.351	1.4	1.217	1.222	1.481	1.441	1.282	1.293	1.629	1.664	1.08	1.1	1.171	1.144	1.223	1.217	1.555	1.585	1.39	1.41	0.977
20:29:03	1.327	1.313	0.91	1.292	1.186	1.186	1.099	1.093	1.163	1.096	1.494	1.512	1.152	1.099	1.163	1.298	1.135	1.156	1.157	1.157	1.017	1.047	1.428	1.432	1.2	1.23	1.252	1.173	1.353	1.401	1.218	1.222	1.479	1.441	1.282	1.293	1.634	1.669	1.08	1.1	1.172	1.154	1.223	1.217	1.561	1.597	1.392	1.41	0.977
20:39:03	1.333	1.321	0.906	1.292	1.189	1.184	1.098	1.091	1.162	1.095	1.516	1.534	1.151	1.101	1.162	1.297	1.138	1.156	1.158	1.157	1.02	1.051	1.428	1.433	1.199	1.23	1.253	1.173	1.354	1.401	1.218	1.221	1.478	1.439	1.282	1.293	1.639	1.674	1.08	1.1	1.174	1.157	1.222	1.216	1.551	1.605	1.394	1.413	0.977
20:49:03	1.335	1.328	0.893	1.292	1.189	1.186	1.097	1.091	1.162	1.095	1.546	1.556	1.152	1.101	1.162	1.298	1.138	1.157	1.159	1.157	1.025	1.055	1.428	1.432	1.199	1.232	1.253	1.173	1.356	1.402	1.217	1.222	1.472	1.438	1.281	1.294	1.644	1.679	1.08	1.1	1.171	1.159	1.221	1.217	1.556	1.612	1.398	1.416	0.976
20:59:03	1.336	1.328	0.883	1.293	1.19	1.186	1.097	1.091	1.161	1.095	1.571	1.569	1.153	1.1	1.163	1.297	1.137	1.156	1.158	1.158	1.029	1.058	1.427	1.432	1.2	1.231	1.252	1.172	1.356	1.402	1.218	1.223	1.471	1.433	1.282	1.293	1.649	1.683	1.08	1.1	1.173	1.158	1.221	1.216	1.56	1.619	1.401	1.42	0.977
21:09:03	1.338	1.324	0.871	1.295	1.188	1.188	1.097	1.091	1.161	1.094	1.588	1.593	1.152	1.1	1.163	1.298	1.137	1.156	1.159	1.157	1.033	1.061	1.427	1.431	1.199	1.23	1.252	1.172	1.357	1.403	1.218	1.224	1.468	1.433	1.282	1.293	1.652	1.688	1.08	1.099	1.173	1.16	1.22	1.215	1.563	1.624	1.401	1.42	0.975
21:19:03	1.339	1.326	0.862	1.296	1.188	1.188	1.096	1.089	1.16	1.095	1.612	1.611	1.152	1.101	1.163	1.299	1.139	1.156	1.16	1.156	1.036	1.064	1.426	1.43	1.197	1.23	1.252	1.171	1.355	1.403	1.218	1.223	1.465	1.432	1.281	1.294	1.656	1.692	1.08	1.099	1.174	1.162	1.219	1.214	1.562	1.628	1.406	1.423	0.974
21:29:03	1.337	1.324	0.857	1.297	1.189	1.187	1.096	1.089	1.16	1.094	1.635	1.63	1.154	1.101	1.163	1.299	1.138	1.156	1.16	1.157	1.04	1.067	1.425	1.43	1.196	1.228	1.253	1.172	1.358	1.386	1.219	1.224	1.464	1.43	1.281	1.294	1.659	1.696	1.08	1.099	1.174	1.163	1.219	1.215	1.576	1.633	1.409	1.427	0.973
21:39:03	1.339	1.325	0.856	1.3	1.192	1.191	1.096	1.089	1.159	1.094	1.657	1.646	1.154	1.101	1.163	1.299	1.138	1.156	1.16	1.157	1.041	1.066	1.425	1.428	1.196	1.229	1.254	1.172	1.36	1.359	1.22	1.224	1.46	1.427	1.281	1.294	1.663	1.7	1.08	1.099	1.171	1.164	1.218	1.215	1.572	1.638	1.412	1.427	0.973
21:49:03	1.338	1.326	0.858	1.3	1.193	1.189	1.096	1.089	1.16	1.093	1.676	1.664	1.155	1.102	1.164	1.299	1.138	1.156	1.161	1.156	1.042	1.067	1.425	1.428	1.196	1.23	1.253	1.172	1.362	1.365	1.217	1.224	1.459	1.426	1.282	1.294	1.667	1.703	1.08	1.099	1.171	1.166	1.218	1.214	1.586	1.644	1.415	1.429	0.974
21:59:03	1.337	1.325	0.862	1.303	1.194	1.194	1.095	1.088	1.159	1.093	1.688	1.676	1.155	1.102	1.164	1.299	1.137	1.156	1.16	1.156	1.044	1.067	1.424	1.428	1.197	1.23	1.253	1.172	1.362	1.367	1.219	1.224	1.45	1.423	1.281	1.295	1.671	1.706	1.08	1.099	1.172	1.169	1.217	1.213	1.593	1.649	1.417	1.43	0.971
22:09:03	1.339	1.326	0.863	1.302	1.196	1.195	1.095	1.088	1.158	1.093	1.703	1.691	1.156	1.103	1.164	1.298	1.139	1.157	1.16	1.156	1.046	1.067	1.424	1.426	1.197	1.228	1.254	1.171	1.34	1.369	1.218	1.222	1.445	1.421	1.281	1.293	1.674	1.708	1.08	1.099	1.175	1.167	1.217	1.213	1.594	1.654	1.421	1.432	0.971
22:19:03	1.34	1.328	0.873	1.303	1.204	1.196	1.095	1.088	1.158	1.095	1.718	1.71	1.156	1.103	1.165	1.299	1.14	1.158	1.16	1.155	1.048	1.068	1.423	1.426	1.198	1.23	1.253	1.172	1.346	1.37	1.217	1.224	1.442	1.419	1.279	1.294	1.679	1.71	1.079	1.098	1.174	1.166	1.216	1.212	1.613	1.659	1.423	1.438	0.971
22:29:03	1.338	1.325	0.878	1.307	1.2	1.197	1.094	1.087	1.157	1.093	1.733	1.72	1.156	1.103	1.165	1.299	1.142	1.158	1.161	1.156	1.053	1.067	1.423	1.425	1.197	1.231	1.252	1.171	1.35	1.371	1.216	1.224	1.443	1.416	1.279	1.294	1.682	1.712	1.08	1.098	1.179	1.167	1.215	1.212	1.625	1.663	1.425	1.438	0.971
22:39:03	1.34	1.326	0.876	1.306	1.203	1.198	1.094	1.088	1.157	1.092	1.744	1.731	1.157	1.103	1.165	1.299	1.142	1.158	1.163	1.156	1.052	1.067	1.423	1.425	1.198	1.23	1.251	1.171	1.346	1.372	1.216	1.224	1.442	1.417	1.279	1.294	1.685	1.713	1.08	1.098	1.179	1.169	1.216	1.212	1.634	1.667	1.431	1.444	0.97
22:49:03	1.341	1.325	0.889	1.307	1.204	1.204	1.094	1.087	1.157	1.092	1.754	1.74	1.157	1.104	1.166	1.299	1.14	1.159	1.162	1.157	1.051	1.067	1.422	1.425	1.199	1.232	1.252	1.171	1.349	1.373	1.217	1.224	1.44	1.411	1.279	1.294	1.688	1.715	1.081	1.098	1.181	1.169	1.215	1.212	1.639	1.671	1.433	1.445	0.97
22:59:03	1.341	1.325	0.895	1.311	1.205	1.2	1.093	1.087	1.157	1.092	1.766	1.751	1.157	1.104	1.166	1.299	1.143	1.157	1.164	1.158	1.05	1.068	1.421	1.423	1.198	1.231	1.252	1.171	1.351	1.371	1.215	1.224	1.441	1.407	1.278	1.294	1.691	1.716	1.081	1.098	1.182	1.17	1.214	1.211	1.643	1.675	1.433	1.449	0.968
23:09:03	1.342	1.325	0.895	1.31	1.204	1.207	1.093	1.087	1.157	1.093	1.775	1.76	1.158	1.104	1.166	1.299	1.143	1.158	1.163	1.159	1.048	1.07	1.421	1.422	1.199	1.232	1.252	1.171	1.343	1.373	1.215	1.222	1.44	1.406	1.278	1.294	1.694	1.716	1.081	1.098	1.186	1.17	1.214	1.21	1.647	1.678	1.435	1.451	0.967
23:19:03	1.343	1.325	0.903	1.313	1.208	1.207	1.093	1.087	1.157	1.095	1.783	1.769	1.158	1.105	1.167	1.299	1.144	1.159	1.165	1.159	1.051	1.072	1.42	1.42	1.195	1.23	1.252	1.17	1.345	1.372	1.214	1.222	1.433	1.406	1.278	1.291	1.696	1.717	1.081	1.098	1.19	1.173	1.214	1.21	1.649	1.682	1.439	1.454	0.966
23:29:03	1.343	1.326	0.917	1.315	1.211	1.207	1.093	1.085	1.157	1.095	1.79	1.777	1.159	1.105	1.168	1.3	1.143	1.159	1.163	1.16	1.054	1.074	1.421	1.419	1.194	1.23	1.251	1.171	1.347	1.375	1.214	1.223	1.432	1.403	1.277	1.292	1.699	1.716	1.082	1.098	1.19	1.175	1.213	1.209	1.652	1.686	1.439	1.458	0.962
23:39:03	1.343	1.327	0.938	1.316	1.214	1.209	1.093	1.086	1.156	1.095	1.798	1.784	1.159	1.105	1.168	1.3	1.141	1.161	1.165	1.161	1.057	1.077	1.419	1.42	1.195	1.226	1.251	1.17	1.35	1.374	1.212	1.224	1.434	1.403	1.277	1.291	1.7	1.716	1.082	1.098	1.192	1.178	1.213	1.209	1.655	1.688	1.447	1.459	0.962
23:49:03	1.344	1.327	0.938	1.318	1.216	1.211	1.092	1.086	1.156	1.093	1.802	1.79	1.16	1.106	1.169	1.3	1.141	1.16	1.167	1.162	1.057	1.08	1.42	1.419	1.195	1.227	1.251	1.17	1.351	1.376	1.21	1.222	1.434	1.404	1.276	1.292	1.702	1.715	1.082	1.098	1.194	1.176	1.212	1.208	1.658	1.691	1.449	1.462	0.959
23:59:03	1.344	1.328	0.951	1.32	1.218	1.213	1.092	1.086	1.155	1.093	1.806	1.796	1.16	1.106	1.168	1.299	1.143	1.16	1.167	1.163	1.059	1.083	1.418	1.418	1.194	1.227	1.251	1.169	1.349	1.377	1.208	1.221	1.431	1.4	1.274	1.292	1.702	1.714	1.082	1.097	1.194	1.18	1.212	1.206	1.66	1.694	1.451	1.468	0.958
1 day, 0:09:03	1.345	1.328	0.958	1.321	1.22	1.214	1.092	1.086	1.155	1.091	1.809	1.798	1.16	1.107	1.169	1.298	1.143	1.159	1.166	1.165	1.062	1.086	1.418	1.417	1.196	1.228	1.249	1.17	1.352	1.379	1.209	1.222	1.432	1.4	1.274	1.29	1.703	1.713	1.083	1.097	1.197	1.181	1.211	1.207	1.663	1.696	1.454	1.469	0.959
[truncated: 35 more columns]

## Sheet: NRS70-va6
Time	NRS70	NRS70-2	NRS70-6.1	NRS70-6.1-2	NRS70-6.2	NRS70-6.2-2	NRS70-6.3	NRS70-6.3-2	NRS70-6.4	NRS70-6.4-2	NRS70-6.5	NRS70-6.5-2	NRS70-6.6	NRS70-6.6-2	NRS70-6.7	NRS70-6.7-2	NRS70-6.8	NRS70-6.8-2	NRS70-6.9	NRS70-6.9-2	NRS70-6.10	NRS70-6.10-2	NRS70-6.11	NRS70-6.11-2	NRS70-6.12	NRS70-6.12-2	NRS70-6.13	NRS70-6.13-2	NRS70-6.14	NRS70-6.14-2	NRS70-6.15	NRS70-6.15-2	NRS70-6.16	NRS70-6.16-2	NRS70-6.17	NRS70-6.17-2	NRS70-6.18	NRS70-6.18-2	NRS70-6.19	NRS70-6.19-2	NRS70-6.20	NRS70-6.20-2	NRS70-6.21	NRS70-6.21-2	NRS70-6.22	NRS70-6.22-2	NRS70-6.23	NRS70-6.23-2	NRS70-6.24
00:00:00	0.234	0.115	0.1	0.099	0.105	0.106	0.17	0.106	0.119	0.177	0.139	0.096	0.138	0.125	0.094	0.095	0.131	0.117	0.138	0.118	0.136	0.147	0.1	0.097	0.095	0.128	0.103	0.099	0.094	0.094	0.168	0.099	0.131	0.134	0.101	0.098	0.094	0.096	0.096	0.096	0.168	0.121	0.101	0.102	0.097	0.096	0.11	0.101	0.112
00:09:03	0.243	0.119	0.1	0.1	0.107	0.108	0.181	0.107	0.124	0.187	0.146	0.096	0.144	0.129	0.094	0.095	0.14	0.124	0.15	0.133	0.156	0.154	0.101	0.098	0.095	0.132	0.104	0.099	0.094	0.094	0.172	0.099	0.144	0.136	0.102	0.098	0.094	0.096	0.097	0.096	0.188	0.122	0.104	0.103	0.097	0.096	0.107	0.101	0.117
00:19:03	0.246	0.121	0.1	0.1	0.107	0.108	0.186	0.108	0.125	0.193	0.15	0.096	0.143	0.13	0.094	0.095	0.143	0.127	0.154	0.135	0.157	0.155	0.101	0.098	0.096	0.135	0.104	0.1	0.094	0.094	0.181	0.1	0.148	0.139	0.102	0.098	0.094	0.096	0.096	0.096	0.195	0.125	0.105	0.103	0.097	0.097	0.109	0.102	0.119
00:29:03	0.258	0.125	0.101	0.1	0.108	0.109	0.19	0.109	0.128	0.204	0.155	0.096	0.145	0.136	0.094	0.095	0.141	0.129	0.159	0.139	0.16	0.158	0.102	0.099	0.096	0.137	0.106	0.1	0.094	0.094	0.189	0.101	0.151	0.141	0.103	0.099	0.094	0.096	0.097	0.096	0.19	0.127	0.106	0.104	0.098	0.097	0.11	0.102	0.121
00:39:03	0.274	0.131	0.102	0.101	0.109	0.11	0.197	0.11	0.13	0.208	0.161	0.096	0.147	0.141	0.094	0.095	0.144	0.132	0.166	0.142	0.166	0.163	0.103	0.099	0.096	0.139	0.107	0.101	0.094	0.094	0.2	0.101	0.155	0.142	0.104	0.099	0.094	0.096	0.097	0.097	0.202	0.13	0.107	0.105	0.099	0.098	0.112	0.103	0.123
00:49:03	0.299	0.139	0.103	0.102	0.112	0.112	0.208	0.112	0.133	0.219	0.169	0.097	0.153	0.147	0.094	0.095	0.148	0.137	0.173	0.147	0.175	0.171	0.104	0.099	0.097	0.143	0.108	0.102	0.094	0.094	0.214	0.102	0.16	0.145	0.106	0.1	0.095	0.097	0.097	0.097	0.212	0.136	0.109	0.107	0.099	0.099	0.113	0.104	0.127
00:59:03	0.327	0.148	0.104	0.103	0.114	0.115	0.221	0.115	0.137	0.23	0.181	0.097	0.16	0.158	0.095	0.095	0.154	0.141	0.18	0.154	0.186	0.18	0.105	0.1	0.097	0.148	0.11	0.102	0.094	0.094	0.232	0.104	0.167	0.149	0.108	0.101	0.094	0.097	0.098	0.097	0.228	0.14	0.111	0.109	0.1	0.099	0.115	0.106	0.13
01:09:03	0.36	0.161	0.106	0.104	0.117	0.118	0.236	0.117	0.142	0.246	0.195	0.097	0.169	0.16	0.094	0.095	0.162	0.147	0.19	0.161	0.2	0.192	0.106	0.101	0.097	0.156	0.112	0.103	0.094	0.094	0.253	0.105	0.175	0.154	0.11	0.102	0.095	0.098	0.099	0.098	0.244	0.147	0.114	0.113	0.102	0.101	0.116	0.105	0.136
01:19:03	0.396	0.177	0.108	0.106	0.122	0.122	0.256	0.122	0.149	0.265	0.211	0.097	0.181	0.172	0.094	0.095	0.172	0.156	0.2	0.169	0.217	0.207	0.108	0.102	0.098	0.164	0.115	0.105	0.094	0.094	0.277	0.107	0.185	0.161	0.113	0.103	0.095	0.098	0.099	0.099	0.263	0.153	0.118	0.117	0.103	0.102	0.119	0.106	0.143
01:29:03	0.434	0.197	0.11	0.108	0.126	0.126	0.278	0.126	0.157	0.286	0.229	0.098	0.195	0.184	0.095	0.095	0.184	0.166	0.214	0.178	0.236	0.226	0.111	0.103	0.098	0.175	0.118	0.106	0.094	0.094	0.303	0.11	0.196	0.169	0.117	0.105	0.095	0.099	0.1	0.099	0.285	0.167	0.122	0.123	0.106	0.104	0.121	0.108	0.153
01:39:03	0.475	0.222	0.113	0.111	0.133	0.133	0.303	0.133	0.167	0.312	0.25	0.098	0.21	0.2	0.095	0.095	0.197	0.178	0.225	0.189	0.259	0.246	0.114	0.105	0.099	0.187	0.123	0.109	0.094	0.094	0.329	0.112	0.209	0.179	0.122	0.107	0.095	0.1	0.101	0.1	0.307	0.176	0.129	0.129	0.108	0.107	0.125	0.11	0.164
01:49:03	0.516	0.251	0.116	0.114	0.14	0.14	0.33	0.14	0.178	0.341	0.273	0.098	0.23	0.217	0.095	0.095	0.213	0.191	0.239	0.199	0.283	0.27	0.117	0.106	0.1	0.202	0.127	0.111	0.094	0.094	0.358	0.115	0.223	0.19	0.128	0.109	0.096	0.101	0.103	0.102	0.332	0.192	0.136	0.138	0.111	0.109	0.129	0.111	0.177
01:59:03	0.555	0.282	0.12	0.118	0.149	0.149	0.362	0.148	0.191	0.372	0.298	0.099	0.25	0.238	0.095	0.095	0.23	0.207	0.251	0.21	0.311	0.296	0.122	0.108	0.1	0.22	0.134	0.114	0.094	0.094	0.385	0.118	0.238	0.202	0.135	0.112	0.096	0.102	0.104	0.102	0.357	0.213	0.145	0.147	0.115	0.112	0.133	0.113	0.191
02:09:03	0.601	0.314	0.125	0.122	0.161	0.16	0.397	0.16	0.207	0.406	0.325	0.099	0.271	0.26	0.095	0.095	0.249	0.224	0.265	0.221	0.343	0.327	0.127	0.111	0.101	0.237	0.141	0.118	0.094	0.094	0.412	0.122	0.254	0.215	0.144	0.116	0.096	0.103	0.105	0.104	0.383	0.23	0.156	0.159	0.119	0.117	0.137	0.115	0.205
02:19:03	0.646	0.346	0.132	0.128	0.176	0.174	0.434	0.173	0.224	0.442	0.354	0.1	0.293	0.287	0.095	0.095	0.27	0.244	0.279	0.233	0.376	0.36	0.133	0.114	0.102	0.258	0.15	0.123	0.094	0.094	0.445	0.126	0.272	0.23	0.155	0.12	0.096	0.106	0.107	0.105	0.412	0.253	0.169	0.173	0.125	0.122	0.143	0.118	0.223
02:29:03	0.692	0.378	0.139	0.134	0.193	0.191	0.476	0.189	0.244	0.478	0.386	0.101	0.315	0.306	0.095	0.095	0.293	0.264	0.294	0.246	0.411	0.395	0.14	0.118	0.103	0.277	0.161	0.129	0.094	0.094	0.472	0.132	0.289	0.243	0.169	0.126	0.097	0.107	0.109	0.107	0.443	0.28	0.184	0.188	0.133	0.128	0.15	0.121	0.243
02:39:03	0.738	0.412	0.148	0.143	0.212	0.211	0.521	0.207	0.265	0.518	0.415	0.101	0.343	0.34	0.095	0.095	0.318	0.287	0.31	0.258	0.448	0.431	0.149	0.122	0.104	0.299	0.174	0.136	0.094	0.094	0.502	0.137	0.306	0.257	0.185	0.132	0.097	0.11	0.112	0.109	0.476	0.305	0.202	0.205	0.141	0.136	0.157	0.124	0.265
02:49:03	0.783	0.449	0.158	0.153	0.235	0.234	0.569	0.228	0.287	0.554	0.455	0.102	0.368	0.359	0.095	0.095	0.345	0.311	0.326	0.273	0.482	0.466	0.16	0.127	0.106	0.324	0.189	0.145	0.094	0.094	0.538	0.145	0.324	0.271	0.204	0.14	0.097	0.113	0.115	0.111	0.512	0.333	0.22	0.224	0.151	0.144	0.165	0.127	0.287
02:59:03	0.822	0.49	0.17	0.165	0.259	0.257	0.618	0.251	0.31	0.594	0.491	0.104	0.394	0.391	0.095	0.095	0.375	0.34	0.344	0.287	0.526	0.504	0.173	0.133	0.108	0.343	0.205	0.155	0.094	0.094	0.575	0.152	0.344	0.285	0.225	0.151	0.098	0.116	0.118	0.114	0.553	0.361	0.24	0.244	0.164	0.155	0.174	0.131	0.316
03:09:03	0.859	0.534	0.183	0.178	0.285	0.282	0.671	0.276	0.336	0.636	0.528	0.105	0.418	0.423	0.095	0.095	0.406	0.369	0.359	0.301	0.567	0.541	0.188	0.14	0.109	0.367	0.223	0.168	0.094	0.094	0.597	0.162	0.364	0.299	0.25	0.163	0.098	0.121	0.123	0.117	0.596	0.387	0.262	0.266	0.178	0.167	0.184	0.136	0.342
03:19:03	0.893	0.577	0.196	0.192	0.313	0.312	0.728	0.301	0.363	0.68	0.559	0.107	0.446	0.451	0.095	0.095	0.442	0.403	0.376	0.318	0.629	0.585	0.206	0.15	0.112	0.395	0.241	0.182	0.094	0.094	0.642	0.172	0.386	0.316	0.278	0.178	0.099	0.127	0.129	0.122	0.644	0.425	0.285	0.29	0.194	0.179	0.196	0.141	0.37
03:29:03	0.92	0.615	0.208	0.207	0.342	0.34	0.783	0.328	0.391	0.725	0.594	0.108	0.473	0.481	0.095	0.095	0.479	0.438	0.39	0.333	0.672	0.635	0.225	0.161	0.114	0.423	0.261	0.197	0.094	0.094	0.693	0.182	0.408	0.333	0.309	0.196	0.099	0.133	0.135	0.126	0.687	0.445	0.311	0.316	0.211	0.193	0.209	0.148	0.399
03:39:03	0.947	0.65	0.223	0.221	0.376	0.374	0.839	0.356	0.42	0.769	0.637	0.11	0.505	0.517	0.095	0.095	0.52	0.476	0.407	0.348	0.725	0.686	0.247	0.175	0.117	0.452	0.283	0.213	0.094	0.094	0.731	0.194	0.432	0.349	0.342	0.215	0.1	0.142	0.143	0.132	0.735	0.468	0.339	0.344	0.229	0.207	0.224	0.157	0.428
03:49:03	0.967	0.684	0.236	0.237	0.412	0.406	0.892	0.385	0.454	0.814	0.676	0.112	0.54	0.562	0.094	0.095	0.564	0.518	0.424	0.366	0.775	0.734	0.271	0.192	0.12	0.484	0.305	0.23	0.094	0.094	0.769	0.205	0.456	0.369	0.379	0.237	0.101	0.152	0.152	0.139	0.783	0.505	0.369	0.373	0.251	0.224	0.24	0.165	0.463
03:59:03	0.984	0.716	0.251	0.253	0.449	0.44	0.939	0.42	0.488	0.859	0.717	0.114	0.577	0.592	0.094	0.095	0.611	0.562	0.448	0.383	0.829	0.785	0.295	0.21	0.125	0.519	0.333	0.249	0.094	0.094	0.809	0.218	0.482	0.389	0.418	0.261	0.102	0.164	0.162	0.146	0.83	0.55	0.402	0.407	0.273	0.241	0.255	0.175	0.496
04:09:03	1.003	0.744	0.268	0.27	0.487	0.479	0.982	0.453	0.526	0.901	0.751	0.116	0.619	0.634	0.094	0.095	0.658	0.608	0.471	0.401	0.864	0.83	0.322	0.231	0.13	0.606	0.359	0.269	0.094	0.094	0.854	0.231	0.51	0.41	0.457	0.288	0.104	0.176	0.172	0.155	0.887	0.616	0.436	0.443	0.297	0.259	0.273	0.186	0.533
04:19:03	1.017	0.769	0.284	0.288	0.532	0.518	1.016	0.49	0.565	0.943	0.833	0.119	0.66	0.678	0.095	0.095	0.707	0.655	0.495	0.421	0.912	0.877	0.352	0.253	0.136	0.642	0.388	0.29	0.094	0.094	0.894	0.246	0.541	0.436	0.499	0.317	0.106	0.191	0.183	0.164	0.926	0.657	0.474	0.481	0.324	0.278	0.292	0.199	0.573
04:29:03	1.032	0.79	0.303	0.305	0.578	0.564	1.055	0.529	0.606	0.981	0.854	0.122	0.702	0.725	0.095	0.095	0.758	0.705	0.519	0.443	0.951	0.92	0.383	0.276	0.142	0.684	0.42	0.313	0.094	0.094	0.932	0.262	0.573	0.461	0.544	0.349	0.108	0.207	0.194	0.173	0.961	0.698	0.513	0.521	0.352	0.299	0.312	0.212	0.612
04:39:03	1.045	0.812	0.326	0.325	0.629	0.611	1.09	0.57	0.646	1.016	0.916	0.125	0.744	0.767	0.094	0.095	0.812	0.752	0.545	0.462	0.992	0.958	0.416	0.3	0.15	0.725	0.455	0.337	0.094	0.094	0.967	0.28	0.603	0.487	0.59	0.385	0.111	0.223	0.205	0.183	0.996	0.741	0.555	0.563	0.383	0.323	0.334	0.227	0.654
04:49:03	1.059	0.83	0.349	0.347	0.679	0.662	1.121	0.61	0.69	1.046	0.941	0.129	0.782	0.808	0.095	0.095	0.862	0.801	0.574	0.489	1.026	0.99	0.451	0.325	0.16	0.771	0.491	0.362	0.094	0.094	0.996	0.297	0.635	0.514	0.639	0.422	0.114	0.239	0.217	0.192	1.03	0.783	0.597	0.604	0.416	0.349	0.357	0.242	0.698
04:59:03	1.069	0.845	0.373	0.372	0.73	0.715	1.148	0.65	0.733	1.074	0.972	0.14	0.821	0.842	0.095	0.095	0.911	0.846	0.605	0.513	1.057	1.019	0.488	0.351	0.169	0.81	0.529	0.389	0.094	0.094	1.028	0.315	0.666	0.542	0.688	0.463	0.119	0.258	0.231	0.203	1.062	0.824	0.642	0.647	0.451	0.377	0.381	0.258	0.745
05:09:03	1.078	0.858	0.397	0.399	0.785	0.765	1.17	0.693	0.774	1.1	1.002	0.137	0.855	0.876	0.094	0.095	0.956	0.89	0.632	0.541	1.084	1.046	0.527	0.38	0.179	0.853	0.57	0.418	0.094	0.094	1.055	0.336	0.697	0.572	0.737	0.505	0.124	0.276	0.244	0.215	1.091	0.863	0.688	0.689	0.489	0.408	0.407	0.276	0.793
05:19:03	1.088	0.872	0.424	0.427	0.839	0.819	1.19	0.737	0.816	1.122	1.046	0.141	0.888	0.908	0.095	0.095	0.997	0.932	0.659	0.563	1.107	1.067	0.568	0.41	0.188	0.893	0.612	0.449	0.094	0.094	1.08	0.357	0.73	0.602	0.788	0.548	0.131	0.297	0.26	0.228	1.121	0.898	0.734	0.734	0.528	0.44	0.432	0.295	0.839
05:29:03	1.096	0.881	0.451	0.453	0.888	0.865	1.212	0.782	0.855	1.143	1.081	0.148	0.92	0.939	0.095	0.095	1.035	0.969	0.687	0.59	1.129	1.09	0.611	0.443	0.198	0.928	0.654	0.483	0.094	0.094	1.102	0.381	0.763	0.632	0.839	0.597	0.138	0.317	0.273	0.24	1.145	0.932	0.782	0.777	0.565	0.473	0.46	0.315	0.881
05:39:03	1.102	0.892	0.481	0.483	0.933	0.909	1.23	0.825	0.89	1.163	1.108	0.154	0.946	0.963	0.094	0.095	1.07	1.006	0.715	0.616	1.146	1.108	0.655	0.476	0.211	0.964	0.7	0.518	0.094	0.094	1.123	0.406	0.795	0.663	0.886	0.647	0.146	0.338	0.289	0.255	1.167	0.964	0.831	0.823	0.602	0.508	0.488	0.336	0.924
05:49:03	1.11	0.902	0.512	0.512	0.971	0.95	1.246	0.866	0.924	1.181	1.115	0.161	0.973	0.987	0.094	0.095	1.102	1.037	0.747	0.643	1.163	1.125	0.701	0.511	0.225	0.996	0.747	0.556	0.093	0.094	1.14	0.431	0.826	0.694	0.931	0.7	0.156	0.36	0.309	0.27	1.185	0.993	0.881	0.863	0.638	0.543	0.517	0.357	0.963
05:59:03	1.116	0.911	0.545	0.541	1.009	0.992	1.263	0.907	0.957	1.197	1.14	0.171	0.998	1.01	0.094	0.095	1.131	1.067	0.774	0.669	1.18	1.139	0.749	0.548	0.239	1.022	0.795	0.594	0.094	0.094	1.157	0.461	0.857	0.72	0.97	0.751	0.167	0.384	0.327	0.288	1.204	1.023	0.93	0.909	0.674	0.578	0.543	0.381	1.002
06:09:03	1.122	0.92	0.577	0.572	1.046	1.027	1.276	0.946	0.988	1.208	1.196	0.322	1.021	1.031	0.094	0.095	1.157	1.096	0.799	0.697	1.194	1.151	0.801	0.586	0.254	1.054	0.843	0.634	0.094	0.094	1.17	0.492	0.886	0.752	1.011	0.804	0.178	0.409	0.347	0.304	1.223	1.047	0.976	0.951	0.712	0.612	0.575	0.405	1.036
06:19:03	1.129	0.928	0.607	0.602	1.082	1.063	1.288	0.981	1.014	1.22	1.214	0.176	1.042	1.047	0.094	0.095	1.182	1.122	0.825	0.721	1.205	1.162	0.848	0.625	0.269	1.075	0.889	0.672	0.094	0.094	1.186	0.521	0.913	0.778	1.047	0.858	0.19	0.436	0.369	0.324	1.237	1.072	1.023	0.993	0.749	0.648	0.604	0.432	1.071
06:29:03	1.132	0.937	0.64	0.635	1.114	1.094	1.3	1.012	1.04	1.228	1.239	0.297	1.06	1.064	0.094	0.095	1.203	1.144	0.847	0.749	1.216	1.171	0.9	0.664	0.287	1.102	0.932	0.716	0.094	0.094	1.197	0.55	0.938	0.806	1.08	0.912	0.204	0.465	0.391	0.343	1.25	1.094	1.067	1.032	0.786	0.684	0.638	0.457	1.102
06:39:03	1.136	0.944	0.672	0.668	1.143	1.121	1.307	1.042	1.06	1.235	1.263	0.191	1.077	1.08	0.094	0.095	1.222	1.164	0.869	0.772	1.225	1.178	0.947	0.709	0.306	1.129	0.974	0.758	0.094	0.094	1.207	0.579	0.962	0.833	1.111	0.96	0.218	0.496	0.415	0.364	1.261	1.115	1.112	1.073	0.822	0.721	0.67	0.486	1.128
06:49:03	1.139	0.953	0.702	0.7	1.169	1.146	1.315	1.07	1.081	1.243	1.284	0.2	1.093	1.094	0.094	0.095	1.239	1.182	0.888	0.797	1.232	1.184	0.992	0.752	0.326	1.149	1.012	0.801	0.094	0.094	1.217	0.61	0.985	0.858	1.137	1.008	0.232	0.529	0.439	0.384	1.27	1.133	1.154	1.109	0.855	0.758	0.703	0.513	1.154
06:59:03	1.143	0.96	0.733	0.732	1.192	1.168	1.322	1.097	1.098	1.248	1.28	0.21	1.106	1.105	0.095	0.095	1.253	1.197	0.906	0.819	1.24	1.188	1.037	0.794	0.347	1.166	1.049	0.845	0.094	0.094	1.224	0.64	1.006	0.883	1.16	1.051	0.247	0.564	0.465	0.407	1.279	1.151	1.2	1.155	0.884	0.793	0.734	0.54	1.178
07:09:03	1.15	0.965	0.761	0.763	1.212	1.189	1.327	1.119	1.113	1.254	1.289	0.22	1.117	1.114	0.094	0.095	1.264	1.211	0.923	0.84	1.246	1.193	1.078	0.839	0.37	1.183	1.085	0.886	0.094	0.094	1.232	0.67	1.027	0.905	1.183	1.092	0.263	0.598	0.491	0.429	1.285	1.167	1.243	1.198	0.912	0.825	0.761	0.569	1.198
07:19:03	1.152	0.97	0.79	0.794	1.229	1.209	1.331	1.14	1.127	1.26	1.281	0.222	1.127	1.124	0.095	0.095	1.276	1.222	0.938	0.861	1.254	1.198	1.115	0.883	0.395	1.2	1.115	0.927	0.094	0.094	1.237	0.7	1.046	0.927	1.204	1.128	0.279	0.637	0.519	0.454	1.292	1.182	1.284	1.236	0.939	0.856	0.79	0.597	1.218
07:29:03	1.154	0.973	0.816	0.821	1.244	1.225	1.335	1.158	1.138	1.262	1.381	0.227	1.137	1.131	0.095	0.095	1.284	1.232	0.951	0.878	1.261	1.202	1.151	0.925	0.419	1.215	1.145	0.964	0.094	0.094	1.242	0.729	1.063	0.948	1.221	1.162	0.296	0.677	0.549	0.478	1.297	1.197	1.324	1.276	0.963	0.885	0.817	0.627	1.237
07:39:03	1.158	0.974	0.841	0.848	1.26	1.241	1.338	1.178	1.149	1.267	1.418	0.629	1.145	1.14	0.095	0.095	1.293	1.242	0.962	0.894	1.267	1.206	1.183	0.968	0.445	1.23	1.171	1	0.094	0.094	1.247	0.758	1.079	0.967	1.24	1.192	0.314	0.718	0.58	0.505	1.302	1.21	1.361	1.314	0.986	0.913	0.846	0.658	1.252
07:49:03	1.16	0.978	0.866	0.874	1.276	1.254	1.34	1.196	1.157	1.271	1.414	0.267	1.153	1.147	0.095	0.095	1.299	1.25	0.972	0.909	1.276	1.207	1.215	1.005	0.472	1.243	1.196	1.034	0.094	0.094	1.251	0.786	1.093	0.985	1.255	1.219	0.334	0.761	0.61	0.532	1.306	1.22	1.396	1.348	1.007	0.938	0.87	0.689	1.27
07:59:03	1.167	0.981	0.887	0.899	1.288	1.268	1.343	1.214	1.162	1.273	1.411	0.257	1.159	1.154	0.095	0.095	1.304	1.257	0.981	0.921	1.281	1.211	1.244	1.04	0.5	1.253	1.218	1.066	0.094	0.094	1.255	0.813	1.108	1.002	1.269	1.244	0.355	0.803	0.642	0.56	1.31	1.23	1.429	1.383	1.025	0.962	0.892	0.717	1.284
08:09:03	1.169	0.984	0.909	0.922	1.3	1.28	1.345	1.228	1.169	1.276	1.446	0.462	1.165	1.161	0.095	0.095	1.309	1.262	0.989	0.934	1.284	1.214	1.271	1.072	0.531	1.264	1.236	1.095	0.094	0.094	1.257	0.837	1.12	1.018	1.283	1.264	0.377	0.846	0.674	0.588	1.312	1.239	1.46	1.414	1.044	0.982	0.914	0.747	1.3
08:19:03	1.171	0.988	0.931	0.946	1.31	1.292	1.347	1.241	1.172	1.279	1.404	0.4	1.171	1.167	0.095	0.095	1.314	1.268	0.995	0.944	1.295	1.218	1.293	1.106	0.563	1.275	1.255	1.123	0.094	0.094	1.26	0.863	1.131	1.034	1.297	1.285	0.401	0.888	0.706	0.616	1.315	1.247	1.488	1.444	1.061	1.002	0.935	0.777	1.315
08:29:03	1.175	0.991	0.952	0.968	1.323	1.302	1.347	1.25	1.176	1.281	1.462	0.49	1.177	1.171	0.095	0.095	1.317	1.272	0.999	0.953	1.291	1.219	1.315	1.135	0.595	1.282	1.271	1.148	0.094	0.094	1.262	0.885	1.141	1.047	1.308	1.301	0.425	0.929	0.738	0.645	1.318	1.252	1.516	1.472	1.073	1.023	0.954	0.805	1.329
08:39:03	1.178	0.993	0.971	0.987	1.335	1.315	1.348	1.259	1.179	1.282	1.415	0.284	1.181	1.176	0.095	0.095	1.319	1.277	1.004	0.962	1.304	1.22	1.335	1.164	0.627	1.291	1.283	1.173	0.094	0.094	1.262	0.907	1.15	1.061	1.322	1.317	0.452	0.966	0.771	0.674	1.32	1.258	1.54	1.493	1.087	1.038	0.97	0.831	1.341
08:49:03	1.181	1.006	0.991	1.009	1.344	1.325	1.35	1.265	1.181	1.284	1.487	0.35	1.186	1.184	0.095	0.095	1.322	1.279	1.008	0.969	1.306	1.221	1.354	1.191	0.66	1.296	1.297	1.195	0.094	0.094	1.263	0.93	1.159	1.073	1.336	1.331	0.481	1.004	0.805	0.703	1.323	1.264	1.563	1.516	1.097	1.053	0.987	0.857	1.353
08:59:03	1.184	1.008	1.01	1.029	1.355	1.335	1.351	1.271	1.182	1.285	1.442	0.334	1.19	1.189	0.095	0.096	1.326	1.282	1.012	0.974	1.311	1.225	1.37	1.214	0.695	1.303	1.308	1.215	0.094	0.094	1.265	0.947	1.165	1.085	1.347	1.346	0.51	1.035	0.836	0.733	1.327	1.269	1.583	1.536	1.11	1.067	1.002	0.881	1.364
09:09:03	1.188	1.01	1.027	1.048	1.364	1.346	1.352	1.275	1.184	1.286	1.449	0.52	1.194	1.194	0.095	0.095	1.327	1.284	1.017	0.979	1.324	1.228	1.387	1.236	0.73	1.308	1.319	1.234	0.094	0.094	1.265	0.966	1.172	1.094	1.359	1.359	0.541	1.067	0.867	0.764	1.329	1.273	1.601	1.556	1.117	1.079	1.016	0.905	1.373
09:19:03	1.193	1.013	1.043	1.065	1.373	1.355	1.352	1.279	1.186	1.288	1.392	0.489	1.196	1.197	0.095	0.095	1.328	1.286	1.019	0.984	1.324	1.228	1.401	1.258	0.768	1.316	1.329	1.251	0.094	0.095	1.267	0.983	1.178	1.104	1.37	1.371	0.574	1.093	0.897	0.793	1.33	1.278	1.618	1.573	1.127	1.09	1.029	0.926	1.379
09:29:03	1.195	1.017	1.056	1.082	1.379	1.363	1.353	1.282	1.186	1.289	1.429	0.494	1.199	1.2	0.094	0.095	1.329	1.287	1.02	0.988	1.328	1.23	1.414	1.277	0.803	1.32	1.338	1.267	0.094	0.094	1.266	0.999	1.184	1.112	1.377	1.382	0.607	1.118	0.926	0.824	1.332	1.28	1.634	1.587	1.134	1.099	1.042	0.948	1.385
09:39:03	1.199	1.02	1.067	1.096	1.388	1.367	1.354	1.284	1.187	1.29	1.429	0.49	1.203	1.204	0.095	0.095	1.332	1.288	1.021	0.991	1.338	1.23	1.426	1.294	0.842	1.324	1.345	1.281	0.094	0.094	1.267	1.011	1.188	1.12	1.382	1.395	0.643	1.14	0.951	0.852	1.334	1.283	1.646	1.601	1.143	1.106	1.052	0.967	1.388
09:49:03	1.202	1.023	1.077	1.106	1.394	1.375	1.353	1.287	1.187	1.29	1.421	0.486	1.206	1.209	0.094	0.095	1.333	1.29	1.023	0.994	1.333	1.231	1.435	1.31	0.879	1.33	1.352	1.294	0.094	0.094	1.268	1.024	1.194	1.129	1.387	1.407	0.68	1.161	0.976	0.878	1.334	1.285	1.658	1.614	1.149	1.117	1.062	0.985	1.391
09:59:03	1.204	1.022	1.085	1.118	1.401	1.38	1.354	1.288	1.187	1.29	1.402	0.525	1.209	1.211	0.095	0.095	1.333	1.291	1.024	0.995	1.331	1.231	1.443	1.326	0.918	1.334	1.359	1.306	0.094	0.094	1.268	1.034	1.196	1.136	1.392	1.418	0.717	1.179	0.999	0.906	1.336	1.288	1.667	1.625	1.154	1.125	1.069	1	1.394
10:09:03	1.206	1.026	1.094	1.127	1.403	1.383	1.355	1.29	1.187	1.291	1.437	0.583	1.21	1.215	0.095	0.095	1.334	1.291	1.026	0.996	1.337	1.233	1.452	1.34	0.955	1.338	1.365	1.317	0.094	0.094	1.268	1.046	1.198	1.142	1.396	1.427	0.755	1.198	1.023	0.932	1.335	1.29	1.675	1.633	1.16	1.132	1.077	1.018	1.398
10:19:03	1.207	1.028	1.1	1.137	1.406	1.384	1.355	1.291	1.186	1.291	1.484	0.626	1.213	1.217	0.095	0.095	1.335	1.291	1.103	0.997	1.345	1.234	1.46	1.353	0.99	1.34	1.369	1.327	0.094	0.094	1.267	1.054	1.2	1.148	1.401	1.436	0.793	1.213	1.044	0.956	1.336	1.291	1.681	1.641	1.165	1.138	1.083	1.033	1.404
10:29:03	1.211	1.029	1.107	1.144	1.399	1.383	1.354	1.292	1.185	1.291	1.439	0.675	1.215	1.221	0.095	0.095	1.335	1.291	1.106	0.997	1.35	1.235	1.466	1.365	1.019	1.342	1.372	1.336	0.094	0.094	1.267	1.063	1.203	1.153	1.405	1.442	0.831	1.229	1.065	0.978	1.336	1.294	1.687	1.644	1.169	1.146	1.09	1.047	1.41
10:39:03	1.215	1.032	1.112	1.151	1.401	1.385	1.355	1.293	1.186	1.291	1.404	0.737	1.218	1.224	0.095	0.095	1.336	1.293	1.106	0.999	1.353	1.236	1.473	1.375	1.052	1.347	1.376	1.344	0.094	0.094	1.268	1.07	1.205	1.156	1.408	1.447	0.87	1.243	1.086	1	1.336	1.294	1.694	1.647	1.174	1.15	1.094	1.061	1.416
10:49:03	1.217	1.035	1.117	1.156	1.402	1.386	1.355	1.295	1.186	1.292	1.406	0.78	1.219	1.226	0.095	0.095	1.337	1.292	1.106	1.004	1.35	1.236	1.478	1.387	1.081	1.348	1.378	1.353	0.094	0.094	1.267	1.077	1.208	1.159	1.412	1.452	0.907	1.256	1.103	1.02	1.338	1.295	1.697	1.652	1.179	1.155	1.098	1.074	1.421
10:59:03	1.22	1.038	1.12	1.161	1.405	1.385	1.355	1.295	1.186	1.292	1.405	0.848	1.221	1.228	0.095	0.095	1.337	1.292	1.107	1.006	1.348	1.237	1.482	1.395	1.111	1.352	1.382	1.36	0.094	0.094	1.267	1.085	1.211	1.162	1.417	1.457	0.939	1.265	1.12	1.04	1.337	1.296	1.702	1.655	1.181	1.16	1.101	1.087	1.426
11:09:03	1.218	1.039	1.124	1.164	1.404	1.385	1.355	1.296	1.185	1.293	1.433	0.895	1.223	1.229	0.094	0.095	1.336	1.292	1.108	1.008	1.353	1.239	1.486	1.402	1.135	1.353	1.385	1.366	0.094	0.094	1.267	1.091	1.213	1.165	1.421	1.461	0.971	1.273	1.137	1.059	1.336	1.297	1.706	1.657	1.184	1.165	1.104	1.097	1.43
11:19:03	1.216	1.042	1.127	1.168	1.405	1.381	1.355	1.296	1.184	1.293	1.543	0.936	1.224	1.232	0.095	0.095	1.336	1.293	1.151	1.008	1.347	1.238	1.487	1.409	1.158	1.355	1.388	1.371	0.094	0.094	1.267	1.097	1.215	1.168	1.424	1.464	0.999	1.281	1.151	1.076	1.337	1.298	1.709	1.659	1.186	1.167	1.106	1.106	1.43
11:29:03	1.228	1.045	1.131	1.173	1.41	1.38	1.355	1.297	1.184	1.292	1.649	0.976	1.225	1.232	0.095	0.095	1.335	1.293	1.15	1.009	1.349	1.239	1.49	1.417	1.178	1.357	1.39	1.375	0.094	0.094	1.267	1.102	1.218	1.172	1.428	1.469	1.025	1.284	1.166	1.093	1.336	1.298	1.714	1.665	1.19	1.169	1.107	1.114	1.433
11:39:03	1.22	1.045	1.134	1.175	1.406	1.383	1.355	1.297	1.184	1.293	1.503	1.018	1.226	1.232	0.095	0.095	1.336	1.292	1.15	1.01	1.345	1.238	1.49	1.424	1.197	1.36	1.392	1.377	0.094	0.094	1.267	1.107	1.22	1.175	1.432	1.472	1.045	1.287	1.177	1.108	1.335	1.299	1.718	1.668	1.192	1.173	1.107	1.121	1.434
11:49:03	1.218	1.049	1.136	1.178	1.404	1.383	1.355	1.298	1.184	1.293	1.48	1.053	1.227	1.234	0.095	0.095	1.335	1.293	1.151	1.011	1.341	1.237	1.491	1.43	1.216	1.362	1.393	1.38	0.094	0.094	1.267	1.109	1.221	1.178	1.433	1.477	1.067	1.292	1.187	1.123	1.334	1.299	1.722	1.669	1.195	1.175	1.11	1.128	1.437
11:59:03	1.224	1.051	1.137	1.181	1.408	1.387	1.354	1.297	1.183	1.294	1.469	1.088	1.228	1.236	0.095	0.095	1.337	1.294	1.152	1.017	1.342	1.234	1.49	1.436	1.231	1.363	1.397	1.383	0.094	0.094	1.266	1.114	1.225	1.18	1.438	1.48	1.086	1.298	1.197	1.137	1.335	1.299	1.726	1.672	1.197	1.176	1.111	1.133	1.437
12:09:03	1.219	1.053	1.14	1.184	1.407	1.397	1.355	1.297	1.183	1.293	1.468	1.121	1.228	1.237	0.095	0.095	1.336	1.293	1.153	1.02	1.342	1.232	1.49	1.441	1.248	1.365	1.398	1.384	0.094	0.094	1.265	1.118	1.228	1.185	1.44	1.484	1.102	1.301	1.203	1.15	1.333	1.299	1.729	1.675	1.198	1.177	1.111	1.14	1.439
12:19:03	1.218	1.056	1.141	1.185	1.406	1.39	1.353	1.297	1.183	1.294	1.507	1.153	1.229	1.236	0.095	0.095	1.335	1.292	1.154	1.023	1.341	1.23	1.491	1.445	1.259	1.367	1.399	1.386	0.094	0.094	1.264	1.122	1.229	1.188	1.444	1.488	1.119	1.305	1.21	1.161	1.333	1.3	1.732	1.679	1.201	1.178	1.112	1.144	1.442
12:29:03	1.218	1.061	1.142	1.187	1.404	1.388	1.353	1.298	1.183	1.294	1.476	1.179	1.23	1.237	0.095	0.095	1.335	1.292	1.157	1.024	1.343	1.232	1.491	1.45	1.274	1.368	1.402	1.388	0.094	0.094	1.265	1.125	1.231	1.19	1.446	1.492	1.129	1.308	1.216	1.174	1.334	1.3	1.735	1.682	1.203	1.179	1.112	1.148	1.444
12:39:03	1.213	1.06	1.144	1.189	1.4	1.388	1.353	1.298	1.182	1.294	1.551	1.204	1.23	1.238	0.095	0.095	1.336	1.293	1.158	1.025	1.342	1.228	1.493	1.452	1.286	1.369	1.405	1.39	0.094	0.094	1.264	1.127	1.236	1.193	1.449	1.494	1.14	1.312	1.222	1.183	1.331	1.3	1.738	1.687	1.206	1.179	1.112	1.15	1.448
12:49:03	1.211	1.062	1.145	1.19	1.395	1.386	1.353	1.297	1.182	1.295	1.481	1.224	1.23	1.238	0.095	0.095	1.336	1.293	1.16	1.027	1.334	1.224	1.492	1.454	1.296	1.37	1.406	1.391	0.094	0.094	1.264	1.13	1.239	1.196	1.452	1.499	1.148	1.315	1.227	1.191	1.332	1.3	1.739	1.691	1.209	1.181	1.114	1.153	1.452
12:59:03	1.21	1.061	1.145	1.191	1.397	1.387	1.352	1.297	1.182	1.295	1.46	1.242	1.231	1.238	0.095	0.095	1.337	1.293	1.163	1.03	1.339	1.224	1.494	1.455	1.307	1.372	1.406	1.392	0.094	0.094	1.263	1.133	1.239	1.199	1.455	1.501	1.157	1.317	1.232	1.199	1.331	1.3	1.742	1.694	1.211	1.183	1.113	1.156	1.455
13:09:03	1.207	1.063	1.146	1.192	1.397	1.385	1.351	1.297	1.182	1.295	1.662	1.258	1.231	1.239	0.095	0.095	1.337	1.292	1.166	1.032	1.331	1.223	1.495	1.456	1.316	1.373	1.408	1.394	0.094	0.094	1.263	1.135	1.244	1.202	1.458	1.505	1.162	1.321	1.236	1.205	1.331	1.301	1.743	1.697	1.214	1.184	1.114	1.16	1.457
13:19:03	1.212	1.063	1.147	1.193	1.394	1.389	1.351	1.296	1.181	1.295	1.5	1.27	1.232	1.239	0.095	0.095	1.337	1.292	1.168	1.034	1.336	1.222	1.494	1.457	1.331	1.373	1.409	1.395	0.094	0.094	1.262	1.139	1.244	1.204	1.461	1.508	1.165	1.323	1.239	1.21	1.33	1.3	1.744	1.701	1.216	1.186	1.115	1.161	1.462
13:29:03	1.206	1.065	1.147	1.194	1.394	1.391	1.351	1.296	1.181	1.296	1.642	1.281	1.232	1.239	0.095	0.095	1.338	1.292	1.169	1.035	1.334	1.218	1.495	1.458	1.333	1.374	1.409	1.395	0.094	0.094	1.261	1.143	1.249	1.207	1.463	1.511	1.168	1.325	1.242	1.216	1.328	1.3	1.746	1.705	1.218	1.188	1.115	1.164	1.466
13:39:03	1.209	1.068	1.147	1.194	1.391	1.384	1.349	1.296	1.18	1.296	1.442	1.29	1.233	1.238	0.095	0.095	1.339	1.292	1.18	1.036	1.336	1.218	1.498	1.458	1.343	1.375	1.408	1.397	0.094	0.094	1.261	1.145	1.25	1.21	1.466	1.514	1.172	1.326	1.245	1.221	1.33	1.3	1.746	1.707	1.221	1.189	1.115	1.167	1.47
13:49:03	1.206	1.066	1.147	1.194	1.394	1.387	1.349	1.295	1.18	1.296	1.466	1.299	1.233	1.238	0.095	0.095	1.338	1.292	1.182	1.038	1.321	1.215	1.498	1.458	1.347	1.375	1.408	1.397	0.094	0.094	1.26	1.149	1.253	1.212	1.469	1.516	1.174	1.328	1.247	1.224	1.328	1.3	1.747	1.708	1.223	1.191	1.116	1.168	1.477
13:59:03	1.203	1.071	1.147	1.194	1.393	1.385	1.349	1.295	1.18	1.297	1.509	1.306	1.233	1.237	0.095	0.095	1.339	1.293	1.186	1.039	1.33	1.206	1.497	1.459	1.355	1.377	1.408	1.398	0.094	0.094	1.26	1.151	1.258	1.215	1.471	1.519	1.176	1.33	1.25	1.228	1.327	1.3	1.748	1.71	1.226	1.194	1.116	1.17	1.484
14:09:03	1.204	1.065	1.147	1.194	1.394	1.385	1.349	1.294	1.18	1.297	1.569	1.32	1.234	1.235	0.095	0.095	1.34	1.293	1.189	1.043	1.331	1.206	1.497	1.46	1.362	1.377	1.408	1.398	0.094	0.094	1.259	1.155	1.259	1.218	1.474	1.521	1.179	1.331	1.252	1.23	1.327	1.3	1.749	1.711	1.228	1.196	1.117	1.171	1.494
14:19:03	1.2	1.068	1.147	1.195	1.39	1.383	1.348	1.293	1.18	1.297	1.491	1.324	1.233	1.236	0.095	0.095	1.341	1.294	1.193	1.049	1.328	1.206	1.498	1.461	1.365	1.377	1.407	1.399	0.094	0.094	1.259	1.158	1.265	1.221	1.476	1.524	1.18	1.332	1.254	1.233	1.326	1.3	1.749	1.714	1.231	1.197	1.118	1.172	1.509
14:29:03	1.201	1.069	1.147	1.195	1.391	1.388	1.347	1.293	1.179	1.296	1.512	1.328	1.234	1.234	0.095	0.095	1.341	1.294	1.196	1.052	1.315	1.206	1.498	1.463	1.369	1.377	1.405	1.398	0.094	0.094	1.257	1.161	1.266	1.225	1.48	1.527	1.183	1.333	1.258	1.234	1.325	1.3	1.749	1.715	1.234	1.199	1.118	1.173	1.527
14:39:03	1.205	1.073	1.147	1.194	1.392	1.384	1.346	1.293	1.179	1.297	1.433	1.332	1.234	1.233	0.095	0.096	1.341	1.294	1.202	1.055	1.319	1.204	1.497	1.463	1.375	1.378	1.406	1.399	0.094	0.094	1.257	1.164	1.268	1.228	1.483	1.529	1.183	1.334	1.259	1.237	1.325	1.3	1.751	1.717	1.237	1.201	1.118	1.174	1.546
14:49:03	1.204	1.072	1.146	1.194	1.396	1.386	1.346	1.292	1.178	1.298	1.446	1.338	1.234	1.232	0.095	0.095	1.342	1.294	1.208	1.059	1.319	1.202	1.496	1.464	1.379	1.377	1.405	1.399	0.094	0.094	1.256	1.168	1.272	1.23	1.486	1.531	1.185	1.335	1.261	1.238	1.325	1.299	1.753	1.718	1.24	1.204	1.119	1.175	1.569
14:59:03	1.201	1.077	1.146	1.194	1.395	1.387	1.345	1.292	1.178	1.298	1.455	1.337	1.233	1.232	0.095	0.095	1.343	1.295	1.212	1.062	1.316	1.201	1.496	1.466	1.381	1.376	1.404	1.397	0.094	0.094	1.255	1.172	1.274	1.234	1.49	1.534	1.186	1.336	1.26	1.241	1.325	1.299	1.753	1.719	1.242	1.204	1.119	1.175	1.597
15:09:03	1.199	1.079	1.146	1.194	1.393	1.386	1.345	1.291	1.178	1.298	1.452	1.33	1.232	1.229	0.095	0.095	1.344	1.296	1.215	1.065	1.313	1.201	1.496	1.469	1.384	1.377	1.403	1.398	0.094	0.094	1.255	1.176	1.278	1.236	1.493	1.537	1.186	1.338	1.261	1.243	1.326	1.299	1.755	1.72	1.244	1.206	1.119	1.176	1.608
15:19:03	1.195	1.082	1.145	1.193	1.392	1.384	1.344	1.291	1.177	1.298	1.585	1.455	1.231	1.229	0.095	0.095	1.344	1.296	1.217	1.067	1.316	1.2	1.495	1.468	1.39	1.377	1.401	1.397	0.094	0.094	1.254	1.178	1.279	1.24	1.497	1.539	1.188	1.338	1.262	1.244	1.324	1.299	1.757	1.72	1.246	1.207	1.12	1.177	1.631
15:29:03	1.194	1.093	1.145	1.193	1.391	1.387	1.344	1.289	1.177	1.298	1.465	1.473	1.231	1.228	0.096	0.095	1.345	1.296	1.222	1.072	1.32	1.2	1.494	1.467	1.39	1.375	1.401	1.396	0.094	0.094	1.254	1.181	1.284	1.243	1.5	1.543	1.188	1.339	1.261	1.246	1.324	1.298	1.758	1.724	1.248	1.208	1.12	1.178	1.651
15:39:03	1.192	1.091	1.145	1.193	1.391	1.386	1.343	1.289	1.176	1.298	1.405	1.483	1.229	1.229	0.096	0.095	1.345	1.296	1.223	1.077	1.313	1.198	1.495	1.468	1.394	1.376	1.4	1.396	0.094	0.094	1.253	1.185	1.285	1.246	1.505	1.544	1.188	1.338	1.261	1.247	1.323	1.298	1.76	1.722	1.248	1.208	1.121	1.178	1.659
15:49:03	1.194	1.093	1.144	1.192	1.394	1.39	1.344	1.288	1.176	1.298	1.435	1.539	1.23	1.225	0.096	0.095	1.346	1.297	1.228	1.083	1.306	1.197	1.496	1.469	1.39	1.375	1.396	1.395	0.094	0.094	1.252	1.189	1.289	1.248	1.507	1.548	1.189	1.341	1.261	1.249	1.322	1.298	1.76	1.723	1.251	1.21	1.123	1.18	1.67
15:59:03	1.192	1.092	1.144	1.192	1.392	1.389	1.343	1.287	1.176	1.298	1.494	1.593	1.229	1.226	0.095	0.095	1.347	1.297	1.229	1.084	1.308	1.194	1.495	1.47	1.395	1.373	1.394	1.395	0.094	0.094	1.252	1.192	1.293	1.252	1.513	1.549	1.189	1.342	1.26	1.249	1.322	1.298	1.764	1.724	1.251	1.21	1.122	1.179	1.687
16:09:03	1.195	1.09	1.144	1.192	1.392	1.389	1.342	1.288	1.175	1.299	1.416	1.575	1.227	1.224	0.095	0.095	1.347	1.298	1.231	1.088	1.306	1.195	1.495	1.468	1.397	1.373	1.393	1.393	0.094	0.095	1.252	1.195	1.298	1.255	1.516	1.552	1.191	1.342	1.26	1.251	1.322	1.298	1.763	1.721	1.253	1.211	1.123	1.179	1.696
16:19:03	1.197	1.089	1.143	1.191	1.392	1.392	1.343	1.286	1.175	1.299	1.437	1.588	1.225	1.222	0.094	0.095	1.348	1.298	1.232	1.089	1.308	1.192	1.494	1.466	1.399	1.371	1.391	1.392	0.094	0.094	1.25	1.198	1.301	1.258	1.52	1.554	1.191	1.344	1.259	1.253	1.321	1.297	1.762	1.728	1.253	1.211	1.123	1.18	1.705
16:29:03	1.197	1.089	1.143	1.191	1.39	1.387	1.342	1.286	1.177	1.299	1.439	1.589	1.226	1.218	0.094	0.095	1.348	1.298	1.234	1.093	1.304	1.192	1.494	1.468	1.399	1.37	1.39	1.39	0.094	0.094	1.249	1.203	1.304	1.26	1.525	1.557	1.193	1.345	1.26	1.255	1.321	1.297	1.764	1.726	1.254	1.211	1.123	1.181	1.712
16:39:03	1.206	1.091	1.143	1.191	1.393	1.389	1.342	1.285	1.178	1.299	1.418	1.597	1.224	1.217	0.095	0.095	1.345	1.299	1.236	1.095	1.303	1.191	1.494	1.467	1.401	1.368	1.389	1.389	0.094	0.094	1.249	1.204	1.308	1.264	1.529	1.56	1.194	1.345	1.259	1.254	1.321	1.298	1.761	1.728	1.255	1.212	1.125	1.18	1.719
16:49:03	1.208	1.092	1.142	1.191	1.391	1.389	1.341	1.285	1.177	1.299	1.407	1.592	1.223	1.217	0.095	0.095	1.341	1.299	1.237	1.096	1.306	1.191	1.494	1.47	1.4	1.367	1.388	1.388	0.094	0.094	1.248	1.208	1.311	1.267	1.534	1.562	1.194	1.346	1.259	1.256	1.319	1.298	1.763	1.726	1.257	1.211	1.125	1.181	1.729
16:59:03	1.211	1.094	1.143	1.19	1.392	1.387	1.341	1.284	1.177	1.3	1.408	1.592	1.221	1.214	0.095	0.095	1.342	1.3	1.239	1.101	1.304	1.19	1.493	1.473	1.401	1.365	1.385	1.387	0.094	0.094	1.25	1.211	1.313	1.27	1.539	1.565	1.195	1.347	1.259	1.256	1.32	1.299	1.767	1.73	1.259	1.212	1.125	1.181	1.735
17:09:03	1.212	1.099	1.143	1.19	1.394	1.388	1.341	1.283	1.177	1.299	1.407	1.591	1.218	1.213	0.095	0.096	1.342	1.3	1.237	1.104	1.304	1.191	1.494	1.476	1.401	1.363	1.385	1.387	0.094	0.094	1.249	1.216	1.317	1.274	1.542	1.567	1.196	1.348	1.258	1.257	1.318	1.298	1.765	1.732	1.26	1.212	1.126	1.182	1.742
17:19:03	1.225	1.102	1.142	1.189	1.397	1.389	1.34	1.283	1.177	1.299	1.403	1.592	1.218	1.212	0.095	0.095	1.343	1.3	1.24	1.104	1.304	1.191	1.493	1.476	1.399	1.362	1.383	1.385	0.094	0.094	1.248	1.218	1.32	1.276	1.546	1.57	1.195	1.348	1.258	1.258	1.318	1.298	1.767	1.731	1.26	1.211	1.125	1.181	1.749
17:29:03	1.228	1.106	1.142	1.188	1.395	1.388	1.339	1.282	1.176	1.299	1.402	1.593	1.218	1.209	0.096	0.095	1.343	1.301	1.238	1.102	1.306	1.193	1.494	1.476	1.399	1.362	1.381	1.384	0.094	0.094	1.246	1.221	1.323	1.28	1.551	1.573	1.195	1.35	1.258	1.259	1.317	1.298	1.764	1.731	1.263	1.212	1.127	1.182	1.754
17:39:03	1.236	1.109	1.141	1.189	1.394	1.388	1.339	1.281	1.175	1.3	1.404	1.59	1.217	1.21	0.096	0.095	1.339	1.302	1.238	1.102	1.305	1.192	1.494	1.478	1.398	1.36	1.382	1.382	0.094	0.094	1.246	1.222	1.326	1.283	1.554	1.575	1.196	1.35	1.257	1.259	1.317	1.298	1.764	1.732	1.265	1.21	1.127	1.182	1.76
17:49:03	1.243	1.111	1.141	1.189	1.394	1.392	1.339	1.28	1.178	1.299	1.404	1.593	1.214	1.206	0.096	0.095	1.338	1.301	1.237	1.103	1.305	1.19	1.495	1.479	1.398	1.357	1.379	1.381	0.094	0.094	1.247	1.225	1.329	1.286	1.559	1.578	1.197	1.35	1.256	1.259	1.317	1.297	1.762	1.733	1.265	1.21	1.127	1.181	1.763
17:59:03	1.245	1.11	1.141	1.188	1.391	1.387	1.339	1.279	1.178	1.299	1.398	1.592	1.213	1.208	0.095	0.095	1.337	1.301	1.235	1.106	1.305	1.191	1.495	1.479	1.396	1.355	1.376	1.38	0.094	0.094	1.245	1.228	1.333	1.289	1.562	1.581	1.197	1.35	1.256	1.26	1.317	1.298	1.762	1.732	1.266	1.21	1.128	1.181	1.764
18:09:03	1.251	1.11	1.14	1.188	1.394	1.39	1.338	1.28	1.177	1.298	1.401	1.594	1.212	1.205	0.096	0.095	1.338	1.301	1.234	1.107	1.303	1.191	1.497	1.477	1.396	1.356	1.378	1.379	0.094	0.094	1.245	1.231	1.334	1.292	1.564	1.584	1.198	1.351	1.255	1.26	1.316	1.298	1.761	1.736	1.266	1.209	1.129	1.181	1.771
18:19:03	1.26	1.106	1.14	1.187	1.393	1.387	1.339	1.279	1.177	1.299	1.397	1.596	1.21	1.204	0.096	0.095	1.335	1.301	1.234	1.108	1.304	1.192	1.498	1.478	1.395	1.356	1.374	1.376	0.094	0.094	1.244	1.234	1.337	1.295	1.566	1.586	1.199	1.351	1.254	1.261	1.316	1.298	1.759	1.734	1.266	1.208	1.129	1.181	1.771
18:29:03	1.266	1.11	1.139	1.186	1.391	1.385	1.338	1.278	1.177	1.298	1.4	1.598	1.211	1.203	0.096	0.095	1.335	1.302	1.233	1.109	1.304	1.192	1.5	1.479	1.394	1.352	1.369	1.376	0.094	0.094	1.244	1.236	1.341	1.297	1.569	1.588	1.198	1.351	1.253	1.262	1.315	1.298	1.757	1.736	1.266	1.208	1.129	1.181	1.777
18:39:03	1.273	1.119	1.139	1.187	1.393	1.389	1.338	1.277	1.177	1.297	1.394	1.597	1.209	1.201	0.096	0.095	1.333	1.302	1.23	1.111	1.301	1.19	1.502	1.479	1.394	1.35	1.369	1.374	0.094	0.094	1.243	1.239	1.343	1.3	1.571	1.591	1.199	1.352	1.253	1.262	1.316	1.3	1.756	1.733	1.266	1.208	1.13	1.181	1.782
18:49:03	1.273	1.126	1.14	1.186	1.39	1.385	1.338	1.277	1.176	1.298	1.393	1.598	1.209	1.199	0.095	0.095	1.334	1.303	1.225	1.112	1.304	1.192	1.504	1.479	1.392	1.351	1.366	1.373	0.094	0.094	1.243	1.24	1.346	1.304	1.573	1.594	1.201	1.351	1.252	1.262	1.315	1.298	1.754	1.735	1.267	1.207	1.13	1.181	1.784
18:59:03	1.266	1.152	1.139	1.186	1.392	1.385	1.337	1.276	1.176	1.297	1.395	1.597	1.209	1.2	0.094	0.095	1.329	1.303	1.226	1.114	1.304	1.193	1.507	1.479	1.4	1.349	1.369	1.371	0.094	0.094	1.242	1.244	1.349	1.306	1.578	1.598	1.199	1.352	1.252	1.262	1.316	1.299	1.753	1.736	1.269	1.206	1.13	1.183	1.788
19:09:03	1.267	1.16	1.139	1.186	1.391	1.387	1.337	1.275	1.176	1.297	1.385	1.596	1.206	1.198	0.095	0.095	1.328	1.303	1.222	1.114	1.302	1.191	1.509	1.487	1.375	1.347	1.362	1.372	0.094	0.094	1.242	1.246	1.352	1.309	1.581	1.599	1.201	1.352	1.251	1.262	1.315	1.299	1.749	1.733	1.268	1.207	1.129	1.182	1.788
19:19:03	1.259	1.171	1.138	1.186	1.391	1.383	1.337	1.275	1.176	1.297	1.383	1.592	1.206	1.198	0.095	0.095	1.324	1.303	1.217	1.114	1.301	1.192	1.513	1.49	1.37	1.346	1.361	1.369	0.094	0.094	1.241	1.248	1.352	1.31	1.581	1.601	1.201	1.351	1.25	1.262	1.314	1.299	1.748	1.735	1.269	1.206	1.13	1.181	1.794
19:29:03	1.258	1.179	1.138	1.185	1.389	1.386	1.337	1.274	1.176	1.297	1.387	1.59	1.205	1.198	0.095	0.095	1.322	1.304	1.213	1.115	1.303	1.193	1.513	1.496	1.375	1.346	1.36	1.367	0.094	0.094	1.24	1.25	1.351	1.313	1.584	1.604	1.202	1.351	1.25	1.263	1.314	1.3	1.748	1.734	1.269	1.207	1.13	1.182	1.792
19:39:03	1.25	1.171	1.138	1.185	1.392	1.385	1.336	1.275	1.176	1.297	1.371	1.59	1.206	1.196	0.095	0.095	1.325	1.304	1.211	1.116	1.3	1.192	1.517	1.499	1.361	1.343	1.357	1.367	0.094	0.094	1.24	1.251	1.354	1.316	1.586	1.607	1.203	1.351	1.249	1.261	1.314	1.299	1.745	1.733	1.269	1.204	1.129	1.181	1.796
19:49:03	1.252	1.173	1.139	1.184	1.39	1.386	1.336	1.274	1.176	1.295	1.358	1.598	1.206	1.194	0.095	0.095	1.313	1.304	1.207	1.117	1.302	1.191	1.518	1.501	1.341	1.342	1.356	1.365	0.094	0.094	1.24	1.254	1.355	1.319	1.587	1.609	1.203	1.351	1.249	1.262	1.314	1.3	1.746	1.733	1.269	1.202	1.13	1.182	1.798
19:59:03	1.248	1.162	1.14	1.184	1.386	1.386	1.336	1.273	1.175	1.296	1.349	1.604	1.203	1.196	0.095	0.095	1.315	1.296	1.205	1.118	1.301	1.193	1.522	1.506	1.353	1.341	1.354	1.365	0.094	0.095	1.24	1.259	1.358	1.322	1.589	1.61	1.202	1.351	1.248	1.261	1.312	1.3	1.743	1.732	1.27	1.202	1.13	1.181	1.799
20:09:03	1.251	1.152	1.14	1.184	1.389	1.385	1.336	1.273	1.175	1.295	1.343	1.599	1.204	1.194	0.095	0.095	1.301	1.292	1.2	1.117	1.299	1.196	1.522	1.509	1.353	1.338	1.352	1.364	0.094	0.095	1.239	1.259	1.359	1.324	1.592	1.613	1.203	1.351	1.247	1.26	1.312	1.301	1.742	1.731	1.272	1.2	1.129	1.181	1.798
20:19:03	1.249	1.144	1.141	1.182	1.385	1.385	1.335	1.272	1.175	1.295	1.342	1.597	1.205	1.191	0.095	0.095	1.301	1.292	1.193	1.117	1.299	1.194	1.525	1.515	1.49	1.338	1.351	1.363	0.094	0.094	1.237	1.258	1.36	1.326	1.594	1.615	1.204	1.351	1.247	1.261	1.312	1.3	1.74	1.73	1.271	1.201	1.129	1.181	1.799
20:29:03	1.25	1.14	1.141	1.182	1.386	1.384	1.335	1.271	1.175	1.295	1.322	1.595	1.205	1.192	0.095	0.095	1.291	1.294	1.191	1.118	1.301	1.198	1.529	1.518	1.326	1.337	1.346	1.363	0.094	0.094	1.237	1.258	1.362	1.328	1.595	1.617	1.204	1.351	1.246	1.259	1.312	1.3	1.739	1.73	1.271	1.198	1.13	1.181	1.798
20:39:03	1.251	1.133	1.142	1.182	1.387	1.386	1.335	1.271	1.175	1.295	1.318	1.595	1.201	1.194	0.095	0.095	1.288	1.294	1.186	1.12	1.296	1.194	1.53	1.522	1.332	1.335	1.345	1.361	0.094	0.094	1.237	1.26	1.364	1.33	1.596	1.618	1.204	1.351	1.246	1.26	1.312	1.301	1.738	1.728	1.272	1.198	1.129	1.181	1.799
20:49:03	1.253	1.126	1.143	1.181	1.386	1.384	1.335	1.272	1.175	1.294	1.312	1.562	1.201	1.193	0.095	0.095	1.284	1.296	1.182	1.12	1.296	1.195	1.533	1.526	1.331	1.337	1.344	1.36	0.094	0.094	1.236	1.262	1.367	1.332	1.599	1.62	1.202	1.349	1.245	1.258	1.311	1.301	1.735	1.727	1.272	1.199	1.129	1.181	1.801
20:59:03	1.252	1.119	1.143	1.18	1.388	1.385	1.335	1.271	1.175	1.293	1.304	1.503	1.204	1.198	0.095	0.095	1.278	1.289	1.183	1.122	1.298	1.197	1.536	1.529	1.334	1.332	1.343	1.36	0.094	0.094	1.234	1.264	1.368	1.333	1.6	1.621	1.203	1.35	1.245	1.258	1.312	1.301	1.735	1.728	1.273	1.197	1.129	1.181	1.803
21:09:03	1.257	1.116	1.145	1.18	1.388	1.387	1.334	1.272	1.174	1.294	1.301	1.39	1.202	1.193	0.095	0.095	1.275	1.289	1.176	1.123	1.297	1.202	1.538	1.535	1.335	1.333	1.34	1.358	0.094	0.094	1.234	1.266	1.369	1.336	1.601	1.623	1.202	1.349	1.242	1.259	1.311	1.301	1.732	1.726	1.274	1.197	1.129	1.181	1.801
21:19:03	1.261	1.115	1.145	1.18	1.388	1.386	1.333	1.27	1.175	1.293	1.297	1.469	1.203	1.195	0.095	0.095	1.278	1.29	1.174	1.123	1.294	1.199	1.541	1.538	1.337	1.332	1.341	1.357	0.094	0.094	1.233	1.269	1.37	1.338	1.602	1.623	1.203	1.35	1.242	1.258	1.311	1.302	1.732	1.724	1.274	1.197	1.129	1.181	1.802
21:29:03	1.265	1.112	1.146	1.18	1.385	1.388	1.334	1.27	1.175	1.293	1.292	1.512	1.201	1.195	0.095	0.095	1.267	1.288	1.172	1.124	1.293	1.202	1.543	1.542	1.33	1.333	1.339	1.357	0.094	0.094	1.234	1.27	1.372	1.34	1.604	1.625	1.202	1.35	1.24	1.259	1.31	1.302	1.731	1.725	1.275	1.196	1.129	1.181	1.801
21:39:03	1.269	1.112	1.147	1.179	1.388	1.385	1.335	1.271	1.175	1.292	1.29	1.493	1.203	1.196	0.095	0.095	1.268	1.288	1.169	1.124	1.294	1.196	1.547	1.543	1.332	1.332	1.339	1.355	0.094	0.094	1.233	1.273	1.374	1.343	1.604	1.626	1.202	1.35	1.24	1.26	1.311	1.303	1.728	1.724	1.276	1.195	1.129	1.181	1.799
21:49:03	1.272	1.113	1.148	1.178	1.387	1.388	1.334	1.271	1.175	1.291	1.282	1.544	1.202	1.199	0.095	0.095	1.27	1.288	1.168	1.125	1.294	1.202	1.55	1.547	1.337	1.329	1.335	1.354	0.094	0.094	1.233	1.274	1.376	1.343	1.605	1.627	1.201	1.35	1.24	1.259	1.31	1.302	1.727	1.723	1.276	1.194	1.129	1.181	1.798
21:59:03	1.276	1.113	1.15	1.178	1.388	1.387	1.334	1.273	1.175	1.29	1.277	1.575	1.205	1.206	0.095	0.095	1.263	1.287	1.165	1.125	1.293	1.207	1.553	1.552	1.335	1.329	1.335	1.355	0.094	0.094	1.231	1.279	1.379	1.346	1.605	1.627	1.202	1.35	1.24	1.259	1.31	1.303	1.727	1.723	1.276	1.194	1.129	1.181	1.799
22:09:03	1.277	1.114	1.154	1.178	1.387	1.385	1.333	1.272	1.175	1.29	1.284	1.547	1.204	1.202	0.095	0.095	1.265	1.287	1.163	1.127	1.29	1.2	1.557	1.553	1.333	1.328	1.344	1.354	0.094	0.094	1.23	1.279	1.382	1.347	1.606	1.628	1.2	1.351	1.239	1.259	1.31	1.303	1.726	1.723	1.278	1.194	1.13	1.181	1.798
22:19:03	1.277	1.116	1.154	1.178	1.388	1.388	1.333	1.272	1.175	1.287	1.275	1.571	1.206	1.205	0.095	0.095	1.268	1.286	1.161	1.127	1.294	1.202	1.559	1.557	1.336	1.331	1.335	1.352	0.094	0.094	1.23	1.279	1.384	1.348	1.606	1.628	1.2	1.351	1.238	1.26	1.309	1.303	1.725	1.72	1.278	1.194	1.13	1.18	1.799
22:29:03	1.281	1.117	1.152	1.177	1.387	1.388	1.333	1.273	1.174	1.287	1.27	1.637	1.203	1.205	0.094	0.095	1.27	1.282	1.159	1.127	1.291	1.204	1.562	1.559	1.34	1.329	1.334	1.351	0.094	0.094	1.229	1.286	1.388	1.35	1.606	1.628	1.198	1.351	1.238	1.259	1.31	1.304	1.724	1.723	1.278	1.194	1.13	1.18	1.792
22:39:03	1.283	1.119	1.16	1.176	1.388	1.387	1.333	1.272	1.175	1.286	1.261	1.609	1.206	1.203	0.094	0.095	1.271	1.282	1.157	1.126	1.288	1.201	1.565	1.56	1.343	1.33	1.333	1.349	0.094	0.094	1.229	1.281	1.391	1.351	1.606	1.628	1.198	1.351	1.236	1.259	1.309	1.304	1.724	1.719	1.278	1.194	1.129	1.18	1.795
22:49:03	1.285	1.122	1.159	1.176	1.387	1.39	1.332	1.275	1.174	1.285	1.269	1.644	1.206	1.208	0.094	0.095	1.274	1.28	1.155	1.127	1.288	1.203	1.568	1.562	1.342	1.331	1.332	1.35	0.094	0.094	1.228	1.287	1.395	1.354	1.606	1.63	1.197	1.351	1.236	1.258	1.309	1.304	1.722	1.718	1.28	1.193	1.13	1.18	1.789
22:59:03	1.288	1.124	1.16	1.175	1.387	1.393	1.333	1.274	1.175	1.286	1.264	1.545	1.205	1.208	0.095	0.095	1.276	1.279	1.153	1.128	1.288	1.205	1.571	1.566	1.34	1.328	1.332	1.348	0.094	0.094	1.228	1.284	1.401	1.355	1.606	1.63	1.195	1.351	1.236	1.26	1.309	1.304	1.722	1.72	1.28	1.194	1.131	1.18	1.789
23:09:03	1.29	1.125	1.163	1.175	1.388	1.393	1.332	1.273	1.175	1.284	1.28	1.596	1.209	1.215	0.095	0.095	1.279	1.278	1.152	1.129	1.287	1.204	1.57	1.568	1.341	1.328	1.337	1.347	0.094	0.095	1.228	1.294	1.406	1.358	1.605	1.629	1.195	1.351	1.236	1.26	1.309	1.304	1.72	1.72	1.282	1.194	1.131	1.181	1.788
23:19:03	1.291	1.125	1.167	1.176	1.388	1.392	1.332	1.273	1.175	1.283	1.274	1.658	1.206	1.209	0.094	0.095	1.281	1.27	1.15	1.129	1.286	1.205	1.573	1.569	1.342	1.327	1.337	1.347	0.094	0.094	1.227	1.292	1.411	1.36	1.605	1.629	1.195	1.352	1.236	1.26	1.309	1.305	1.719	1.72	1.281	1.194	1.13	1.18	1.784
23:29:03	1.29	1.126	1.167	1.175	1.387	1.392	1.33	1.273	1.175	1.283	1.267	1.713	1.209	1.209	0.095	0.095	1.284	1.269	1.147	1.129	1.285	1.204	1.575	1.571	1.34	1.327	1.335	1.343	0.094	0.094	1.227	1.294	1.415	1.362	1.605	1.629	1.194	1.353	1.236	1.261	1.308	1.305	1.721	1.718	1.282	1.194	1.13	1.18	1.782
23:39:03	1.291	1.126	1.171	1.174	1.39	1.393	1.331	1.275	1.175	1.283	1.257	1.665	1.208	1.211	0.095	0.096	1.287	1.263	1.146	1.128	1.285	1.203	1.576	1.575	1.342	1.327	1.335	1.344	0.094	0.094	1.227	1.298	1.42	1.365	1.604	1.629	1.192	1.353	1.236	1.26	1.308	1.306	1.718	1.717	1.283	1.194	1.131	1.18	1.778
23:49:03	1.29	1.127	1.174	1.176	1.386	1.394	1.331	1.274	1.175	1.282	1.267	1.653	1.21	1.212	0.095	0.095	1.29	1.263	1.145	1.127	1.283	1.205	1.577	1.577	1.341	1.328	1.335	1.345	0.094	0.094	1.225	1.299	1.424	1.367	1.604	1.629	1.192	1.353	1.23	1.259	1.308	1.306	1.718	1.715	1.284	1.194	1.132	1.18	1.776
23:59:03	1.29	1.132	1.176	1.175	1.385	1.395	1.329	1.276	1.175	1.28	1.263	1.67	1.213	1.225	0.095	0.095	1.293	1.261	1.144	1.128	1.282	1.206	1.578	1.58	1.342	1.327	1.335	1.345	0.094	0.094	1.226	1.299	1.428	1.37	1.603	1.629	1.191	1.353	1.228	1.26	1.309	1.307	1.718	1.718	1.285	1.193	1.132	1.18	1.773
1 day, 0:09:03	1.288	1.133	1.179	1.174	1.388	1.394	1.33	1.278	1.176	1.28	1.273	1.673	1.21	1.217	0.095	0.095	1.296	1.25	1.142	1.128	1.279	1.21	1.577	1.583	1.348	1.327	1.336	1.341	0.094	0.095	1.225	1.304	1.431	1.373	1.603	1.628	1.192	1.354	1.228	1.262	1.309	1.308	1.718	1.718	1.285	1.194	1.131	1.18	1.767
[truncated: 35 more columns]

## Sheet: NRS70-va8
Time	NRS70	NRS70-2	NRS70-8.1	NRS70-8.1-2	NRS70-8.2	NRS70-8.2-2	NRS70-8.3	NRS70-8.3-2	NRS70-8.4	NRS70-8.4-2	NRS70-8.5	NRS70-8.5-2	NRS70-8.6	NRS70-8.6-2	NRS70-8.7	NRS70-8.7-2	NRS70-8.8	NRS70-8.8-2	NRS70-8.9	NRS70-8.9-2	NRS70-8.10	NRS70-8.10-2	NRS70-8.11	NRS70-8.11-2	NRS70-8.12	NRS70-8.12-2	NRS70-8.13	NRS70-8.13-2	NRS70-8.14	NRS70-8.14-2	NRS70-8.15	NRS70-8.15-2	NRS70-8.16	NRS70-8.16-2	NRS70-8.17	NRS70-8.17-2	NRS70-8.18	NRS70-8.18-2	NRS70-8.19	NRS70-8.19-2	NRS70-8.20	NRS70-8.20-2	NRS70-8.21	NRS70-8.21-2	NRS70-8.22	NRS70-8.22-2	NRS70-8.23	NRS70-8.23-2	NRS70-8.24
00:00:00	0.093	0.094	0.097	0.095	0.096	0.095	0.095	0.094	0.097	0.093	0.097	0.094	0.097	0.093	0.092	0.095	0.093	0.092	0.093	0.094	0.093	0.093	0.093	0.093	0.093	0.093	0.094	0.092	0.095	0.092	0.093	0.093	0.094	0.093	0.093	0.095	0.092	0.093	0.093	0.092	0.1	0.095	0.093	0.093	0.091	0.092	0.091	0.094	0.092
00:09:22	0.093	0.093	0.096	0.095	0.096	0.096	0.095	0.094	0.095	0.093	0.099	0.094	0.095	0.093	0.092	0.095	0.093	0.092	0.093	0.095	0.093	0.094	0.094	0.093	0.093	0.092	0.094	0.092	0.096	0.092	0.093	0.093	0.093	0.093	0.093	0.097	0.092	0.091	0.093	0.092	0.1	0.096	0.094	0.093	0.092	0.092	0.091	0.094	0.092
00:19:22	0.094	0.093	0.097	0.096	0.096	0.096	0.095	0.094	0.096	0.093	0.099	0.094	0.096	0.094	0.092	0.095	0.093	0.092	0.093	0.097	0.094	0.094	0.094	0.093	0.093	0.093	0.094	0.092	0.096	0.092	0.095	0.094	0.094	0.094	0.093	0.096	0.092	0.091	0.094	0.092	0.101	0.096	0.094	0.093	0.091	0.092	0.091	0.094	0.092
00:29:22	0.094	0.094	0.096	0.095	0.096	0.096	0.095	0.094	0.095	0.093	0.099	0.094	0.096	0.094	0.092	0.094	0.093	0.092	0.093	0.097	0.093	0.094	0.093	0.093	0.093	0.092	0.094	0.092	0.096	0.092	0.094	0.094	0.094	0.093	0.093	0.095	0.091	0.091	0.094	0.092	0.101	0.096	0.094	0.093	0.091	0.092	0.091	0.094	0.092
00:39:22	0.094	0.094	0.096	0.096	0.096	0.096	0.095	0.094	0.095	0.093	0.1	0.095	0.096	0.094	0.093	0.095	0.093	0.092	0.094	0.097	0.094	0.094	0.094	0.093	0.094	0.093	0.094	0.092	0.096	0.092	0.095	0.094	0.094	0.094	0.093	0.096	0.092	0.091	0.095	0.093	0.101	0.096	0.094	0.094	0.091	0.092	0.091	0.094	0.092
00:49:22	0.094	0.095	0.096	0.096	0.096	0.096	0.095	0.094	0.095	0.093	0.1	0.096	0.097	0.095	0.093	0.095	0.094	0.092	0.094	0.1	0.094	0.094	0.094	0.093	0.095	0.093	0.094	0.092	0.096	0.092	0.096	0.094	0.095	0.094	0.093	0.097	0.092	0.091	0.096	0.093	0.101	0.096	0.094	0.094	0.091	0.092	0.091	0.095	0.092
00:59:22	0.094	0.095	0.096	0.096	0.096	0.097	0.095	0.094	0.095	0.093	0.101	0.096	0.097	0.095	0.094	0.095	0.094	0.092	0.095	0.1	0.094	0.094	0.094	0.093	0.094	0.094	0.094	0.092	0.096	0.092	0.096	0.094	0.095	0.094	0.093	0.096	0.092	0.092	0.096	0.093	0.101	0.097	0.095	0.094	0.091	0.092	0.091	0.094	0.092
01:09:22	0.094	0.095	0.096	0.096	0.096	0.097	0.095	0.094	0.095	0.093	0.101	0.096	0.097	0.095	0.094	0.095	0.094	0.092	0.095	0.101	0.094	0.094	0.095	0.093	0.093	0.094	0.095	0.093	0.096	0.092	0.096	0.095	0.095	0.094	0.093	0.096	0.092	0.092	0.096	0.093	0.101	0.097	0.095	0.094	0.092	0.092	0.091	0.094	0.092
01:19:22	0.094	0.095	0.096	0.096	0.096	0.097	0.095	0.094	0.095	0.093	0.103	0.097	0.097	0.095	0.093	0.095	0.094	0.092	0.097	0.103	0.094	0.094	0.096	0.094	0.093	0.094	0.095	0.093	0.096	0.092	0.097	0.095	0.095	0.094	0.094	0.098	0.092	0.092	0.097	0.093	0.101	0.097	0.095	0.095	0.091	0.092	0.091	0.094	0.092
01:29:22	0.094	0.095	0.097	0.096	0.097	0.097	0.096	0.094	0.095	0.093	0.103	0.097	0.097	0.096	0.093	0.095	0.094	0.092	0.097	0.103	0.094	0.094	0.096	0.094	0.093	0.094	0.095	0.093	0.096	0.093	0.098	0.095	0.096	0.094	0.095	0.097	0.092	0.092	0.097	0.093	0.101	0.097	0.096	0.095	0.092	0.093	0.091	0.095	0.092
01:39:22	0.095	0.095	0.097	0.096	0.097	0.097	0.096	0.095	0.095	0.093	0.105	0.097	0.097	0.096	0.093	0.095	0.094	0.092	0.098	0.103	0.094	0.095	0.095	0.094	0.094	0.094	0.095	0.093	0.096	0.093	0.098	0.095	0.096	0.094	0.095	0.098	0.092	0.093	0.097	0.094	0.101	0.097	0.096	0.096	0.092	0.093	0.091	0.095	0.092
01:49:22	0.094	0.095	0.097	0.096	0.097	0.097	0.095	0.094	0.095	0.093	0.108	0.098	0.098	0.096	0.093	0.095	0.094	0.092	0.098	0.103	0.094	0.095	0.095	0.094	0.094	0.094	0.095	0.093	0.096	0.093	0.098	0.095	0.096	0.094	0.095	0.098	0.092	0.092	0.097	0.094	0.101	0.097	0.096	0.096	0.092	0.093	0.091	0.096	0.092
01:59:22	0.095	0.095	0.097	0.096	0.097	0.097	0.096	0.095	0.095	0.093	0.11	0.098	0.098	0.097	0.093	0.095	0.094	0.093	0.098	0.104	0.094	0.095	0.095	0.094	0.095	0.094	0.095	0.093	0.097	0.093	0.097	0.096	0.097	0.094	0.095	0.099	0.093	0.093	0.098	0.094	0.101	0.097	0.097	0.097	0.093	0.093	0.092	0.095	0.092
02:09:22	0.095	0.095	0.097	0.096	0.097	0.097	0.095	0.095	0.095	0.093	0.111	0.098	0.098	0.097	0.093	0.095	0.094	0.093	0.098	0.104	0.094	0.095	0.095	0.094	0.095	0.094	0.095	0.093	0.096	0.093	0.097	0.096	0.097	0.094	0.095	0.099	0.093	0.093	0.098	0.094	0.101	0.097	0.097	0.097	0.093	0.093	0.091	0.095	0.092
02:19:22	0.095	0.096	0.097	0.096	0.097	0.098	0.096	0.095	0.095	0.093	0.114	0.099	0.099	0.097	0.093	0.095	0.094	0.093	0.098	0.104	0.094	0.096	0.095	0.094	0.095	0.094	0.095	0.093	0.097	0.093	0.097	0.096	0.098	0.094	0.095	0.098	0.093	0.093	0.098	0.094	0.102	0.097	0.097	0.098	0.093	0.093	0.092	0.095	0.092
02:29:22	0.095	0.095	0.097	0.096	0.097	0.098	0.096	0.095	0.095	0.093	0.114	0.099	0.099	0.098	0.093	0.095	0.094	0.093	0.098	0.105	0.094	0.096	0.096	0.095	0.095	0.094	0.095	0.093	0.097	0.093	0.097	0.096	0.098	0.094	0.095	0.098	0.093	0.093	0.098	0.094	0.102	0.098	0.098	0.099	0.093	0.093	0.092	0.095	0.092
02:39:22	0.096	0.096	0.097	0.096	0.097	0.098	0.096	0.095	0.095	0.093	0.114	0.099	0.1	0.099	0.093	0.095	0.094	0.093	0.098	0.105	0.094	0.096	0.096	0.095	0.095	0.094	0.095	0.093	0.097	0.093	0.097	0.096	0.098	0.094	0.095	0.098	0.093	0.093	0.098	0.094	0.102	0.097	0.099	0.1	0.094	0.094	0.092	0.096	0.092
02:49:22	0.096	0.096	0.097	0.096	0.098	0.098	0.096	0.095	0.095	0.093	0.114	0.1	0.101	0.099	0.093	0.095	0.094	0.093	0.098	0.105	0.094	0.096	0.096	0.095	0.095	0.094	0.095	0.093	0.097	0.093	0.097	0.096	0.098	0.095	0.095	0.099	0.093	0.093	0.098	0.094	0.102	0.098	0.099	0.101	0.094	0.094	0.092	0.096	0.092
02:59:22	0.096	0.096	0.097	0.096	0.098	0.099	0.096	0.095	0.095	0.093	0.116	0.1	0.101	0.1	0.093	0.095	0.094	0.093	0.098	0.106	0.094	0.097	0.096	0.096	0.095	0.094	0.095	0.093	0.097	0.093	0.097	0.097	0.099	0.095	0.095	0.099	0.093	0.093	0.098	0.095	0.102	0.098	0.1	0.102	0.094	0.094	0.092	0.096	0.092
03:09:22	0.097	0.096	0.097	0.096	0.098	0.099	0.096	0.095	0.095	0.093	0.116	0.1	0.102	0.101	0.093	0.095	0.094	0.093	0.098	0.106	0.094	0.097	0.097	0.096	0.095	0.094	0.095	0.093	0.097	0.093	0.098	0.096	0.099	0.095	0.095	0.098	0.093	0.093	0.099	0.095	0.102	0.098	0.102	0.104	0.095	0.094	0.092	0.096	0.092
03:19:22	0.098	0.097	0.097	0.096	0.099	0.1	0.096	0.095	0.095	0.093	0.116	0.101	0.103	0.102	0.093	0.095	0.094	0.093	0.099	0.107	0.094	0.097	0.097	0.096	0.096	0.095	0.096	0.093	0.097	0.093	0.098	0.097	0.098	0.095	0.096	0.097	0.094	0.093	0.099	0.095	0.102	0.098	0.103	0.107	0.095	0.094	0.092	0.097	0.093
03:29:22	0.098	0.097	0.097	0.096	0.099	0.1	0.096	0.095	0.096	0.093	0.115	0.101	0.104	0.103	0.093	0.095	0.094	0.093	0.099	0.106	0.094	0.097	0.097	0.096	0.096	0.094	0.095	0.093	0.097	0.093	0.097	0.097	0.098	0.095	0.096	0.1	0.093	0.093	0.099	0.095	0.102	0.098	0.104	0.109	0.095	0.094	0.092	0.096	0.093
03:39:22	0.1	0.098	0.098	0.096	0.099	0.101	0.096	0.095	0.096	0.093	0.115	0.101	0.105	0.105	0.093	0.095	0.094	0.093	0.099	0.107	0.094	0.097	0.098	0.097	0.096	0.095	0.096	0.093	0.097	0.093	0.098	0.097	0.099	0.095	0.096	0.1	0.094	0.094	0.099	0.095	0.102	0.098	0.107	0.113	0.096	0.094	0.092	0.096	0.093
03:49:22	0.101	0.099	0.098	0.096	0.1	0.101	0.096	0.095	0.096	0.093	0.115	0.102	0.107	0.107	0.093	0.095	0.094	0.093	0.099	0.107	0.094	0.097	0.098	0.098	0.096	0.094	0.096	0.093	0.097	0.093	0.098	0.097	0.099	0.095	0.096	0.099	0.094	0.094	0.099	0.095	0.102	0.098	0.109	0.117	0.097	0.095	0.092	0.096	0.093
03:59:22	0.104	0.101	0.098	0.097	0.1	0.102	0.097	0.095	0.096	0.093	0.116	0.102	0.11	0.11	0.093	0.096	0.095	0.093	0.099	0.108	0.095	0.098	0.098	0.099	0.096	0.095	0.096	0.094	0.097	0.094	0.098	0.098	0.1	0.096	0.096	0.099	0.094	0.094	0.099	0.095	0.102	0.099	0.113	0.122	0.098	0.095	0.093	0.097	0.093
04:09:22	0.108	0.103	0.099	0.097	0.1	0.103	0.096	0.095	0.096	0.093	0.116	0.102	0.113	0.114	0.093	0.096	0.094	0.093	0.1	0.109	0.094	0.097	0.099	0.099	0.096	0.095	0.096	0.094	0.097	0.093	0.098	0.098	0.1	0.096	0.096	0.1	0.094	0.094	0.1	0.095	0.102	0.099	0.116	0.128	0.098	0.095	0.093	0.096	0.093
04:19:22	0.113	0.106	0.099	0.097	0.101	0.103	0.097	0.096	0.096	0.094	0.116	0.103	0.116	0.118	0.093	0.096	0.095	0.094	0.1	0.108	0.095	0.098	0.1	0.101	0.097	0.095	0.097	0.094	0.097	0.094	0.099	0.098	0.101	0.096	0.096	0.102	0.095	0.094	0.099	0.095	0.103	0.099	0.122	0.136	0.099	0.096	0.093	0.097	0.094
04:29:22	0.12	0.11	0.099	0.097	0.102	0.104	0.097	0.095	0.096	0.094	0.115	0.103	0.119	0.123	0.093	0.095	0.095	0.093	0.1	0.108	0.094	0.097	0.1	0.102	0.096	0.095	0.097	0.094	0.097	0.093	0.099	0.098	0.101	0.096	0.096	0.101	0.095	0.094	0.099	0.095	0.103	0.099	0.127	0.145	0.1	0.096	0.092	0.096	0.094
04:39:22	0.13	0.116	0.099	0.097	0.103	0.106	0.097	0.096	0.096	0.094	0.116	0.103	0.124	0.129	0.093	0.095	0.095	0.093	0.1	0.109	0.094	0.097	0.101	0.104	0.096	0.095	0.097	0.094	0.097	0.094	0.099	0.098	0.102	0.096	0.097	0.102	0.096	0.095	0.099	0.096	0.103	0.099	0.135	0.156	0.101	0.096	0.093	0.097	0.094
04:49:22	0.142	0.125	0.1	0.097	0.104	0.108	0.097	0.096	0.096	0.094	0.116	0.103	0.129	0.136	0.093	0.096	0.095	0.094	0.101	0.109	0.095	0.097	0.102	0.106	0.097	0.095	0.098	0.095	0.097	0.094	0.099	0.099	0.102	0.097	0.097	0.103	0.096	0.095	0.1	0.096	0.103	0.099	0.143	0.17	0.103	0.097	0.093	0.097	0.094
04:59:22	0.158	0.135	0.101	0.098	0.106	0.109	0.097	0.096	0.096	0.094	0.116	0.104	0.135	0.144	0.093	0.096	0.095	0.094	0.102	0.11	0.095	0.097	0.103	0.109	0.097	0.095	0.098	0.095	0.097	0.094	0.1	0.099	0.103	0.097	0.097	0.102	0.097	0.096	0.101	0.096	0.103	0.1	0.155	0.186	0.105	0.098	0.093	0.096	0.094
05:09:22	0.176	0.148	0.101	0.098	0.107	0.112	0.097	0.096	0.096	0.094	0.117	0.104	0.142	0.153	0.093	0.095	0.095	0.094	0.102	0.11	0.095	0.097	0.105	0.112	0.097	0.095	0.099	0.095	0.097	0.094	0.1	0.1	0.104	0.097	0.097	0.102	0.098	0.096	0.1	0.096	0.104	0.1	0.168	0.204	0.107	0.098	0.093	0.096	0.094
05:19:22	0.197	0.163	0.102	0.098	0.11	0.115	0.097	0.096	0.096	0.094	0.117	0.104	0.15	0.162	0.093	0.096	0.095	0.094	0.102	0.111	0.095	0.097	0.107	0.116	0.097	0.096	0.1	0.096	0.098	0.094	0.101	0.101	0.105	0.097	0.097	0.103	0.1	0.097	0.1	0.096	0.104	0.1	0.182	0.224	0.109	0.099	0.094	0.097	0.095
05:29:22	0.221	0.181	0.104	0.098	0.113	0.118	0.097	0.096	0.096	0.094	0.118	0.104	0.158	0.172	0.093	0.095	0.095	0.094	0.103	0.111	0.095	0.097	0.109	0.122	0.097	0.096	0.101	0.097	0.097	0.094	0.102	0.102	0.106	0.097	0.098	0.104	0.102	0.099	0.1	0.096	0.105	0.101	0.198	0.245	0.111	0.1	0.094	0.097	0.095
05:39:22	0.247	0.202	0.106	0.099	0.116	0.123	0.098	0.096	0.096	0.095	0.118	0.105	0.168	0.182	0.093	0.096	0.095	0.094	0.103	0.112	0.095	0.097	0.112	0.128	0.097	0.097	0.103	0.098	0.098	0.094	0.104	0.104	0.108	0.098	0.098	0.105	0.104	0.1	0.1	0.097	0.105	0.101	0.215	0.271	0.114	0.102	0.094	0.097	0.095
05:49:22	0.275	0.222	0.108	0.099	0.121	0.128	0.098	0.096	0.097	0.094	0.119	0.105	0.178	0.194	0.093	0.096	0.095	0.094	0.104	0.113	0.095	0.097	0.116	0.136	0.097	0.097	0.104	0.099	0.098	0.094	0.106	0.106	0.11	0.098	0.098	0.107	0.107	0.102	0.102	0.097	0.106	0.101	0.232	0.3	0.116	0.103	0.095	0.097	0.096
05:59:22	0.306	0.245	0.112	0.1	0.126	0.134	0.098	0.097	0.097	0.094	0.119	0.105	0.189	0.206	0.093	0.095	0.095	0.094	0.105	0.114	0.095	0.097	0.12	0.144	0.097	0.097	0.106	0.1	0.098	0.094	0.109	0.108	0.113	0.099	0.099	0.109	0.111	0.105	0.1	0.097	0.107	0.102	0.251	0.331	0.119	0.105	0.095	0.097	0.096
06:09:22	0.343	0.272	0.116	0.101	0.132	0.14	0.099	0.097	0.097	0.094	0.12	0.107	0.2	0.218	0.093	0.096	0.096	0.094	0.106	0.115	0.095	0.097	0.126	0.155	0.098	0.098	0.109	0.102	0.098	0.094	0.113	0.112	0.115	0.1	0.1	0.112	0.116	0.108	0.1	0.098	0.108	0.102	0.272	0.366	0.122	0.107	0.096	0.097	0.097
06:19:22	0.38	0.302	0.122	0.103	0.139	0.147	0.099	0.097	0.097	0.095	0.119	0.107	0.212	0.232	0.093	0.095	0.096	0.095	0.107	0.116	0.096	0.097	0.132	0.167	0.098	0.099	0.113	0.104	0.098	0.094	0.117	0.117	0.118	0.1	0.101	0.116	0.122	0.112	0.099	0.098	0.109	0.103	0.295	0.404	0.125	0.11	0.096	0.097	0.098
06:29:22	0.424	0.336	0.129	0.104	0.148	0.156	0.1	0.097	0.097	0.095	0.12	0.107	0.224	0.247	0.093	0.096	0.096	0.095	0.108	0.117	0.096	0.097	0.14	0.18	0.099	0.1	0.117	0.107	0.098	0.094	0.123	0.122	0.122	0.101	0.102	0.121	0.128	0.116	0.1	0.099	0.111	0.104	0.32	0.443	0.129	0.114	0.096	0.097	0.099
06:39:22	0.475	0.376	0.139	0.107	0.158	0.166	0.101	0.098	0.097	0.095	0.121	0.107	0.238	0.264	0.093	0.096	0.097	0.095	0.11	0.119	0.096	0.098	0.149	0.197	0.1	0.101	0.122	0.111	0.098	0.094	0.13	0.13	0.126	0.102	0.103	0.126	0.136	0.122	0.1	0.1	0.114	0.106	0.347	0.485	0.133	0.118	0.097	0.098	0.101
06:49:22	0.52	0.422	0.149	0.11	0.167	0.176	0.102	0.099	0.097	0.095	0.122	0.108	0.251	0.281	0.093	0.096	0.097	0.095	0.111	0.12	0.097	0.098	0.16	0.213	0.101	0.103	0.128	0.115	0.098	0.094	0.138	0.138	0.129	0.103	0.105	0.132	0.145	0.128	0.1	0.101	0.116	0.107	0.376	0.528	0.139	0.122	0.098	0.098	0.103
06:59:22	0.564	0.468	0.162	0.115	0.178	0.188	0.104	0.099	0.098	0.095	0.123	0.108	0.266	0.3	0.093	0.096	0.098	0.096	0.113	0.122	0.097	0.098	0.172	0.232	0.102	0.104	0.135	0.12	0.098	0.095	0.148	0.148	0.134	0.104	0.107	0.139	0.156	0.136	0.101	0.102	0.119	0.109	0.407	0.575	0.146	0.128	0.1	0.099	0.105
07:09:22	0.603	0.523	0.177	0.12	0.191	0.201	0.105	0.1	0.098	0.095	0.124	0.11	0.282	0.319	0.093	0.096	0.099	0.096	0.115	0.124	0.097	0.098	0.186	0.252	0.103	0.106	0.142	0.126	0.098	0.095	0.159	0.16	0.139	0.106	0.109	0.146	0.167	0.144	0.102	0.103	0.123	0.111	0.44	0.622	0.154	0.134	0.101	0.099	0.108
07:19:22	0.65	0.59	0.195	0.128	0.205	0.213	0.107	0.1	0.099	0.095	0.126	0.11	0.297	0.339	0.093	0.095	0.099	0.097	0.117	0.127	0.098	0.098	0.2	0.273	0.104	0.108	0.15	0.132	0.098	0.095	0.171	0.172	0.145	0.108	0.113	0.156	0.179	0.154	0.102	0.104	0.127	0.113	0.476	0.672	0.165	0.14	0.102	0.098	0.111
07:29:22	0.673	0.644	0.217	0.138	0.22	0.226	0.109	0.101	0.1	0.096	0.127	0.111	0.315	0.361	0.093	0.096	0.1	0.097	0.119	0.129	0.099	0.098	0.216	0.295	0.106	0.111	0.16	0.14	0.099	0.095	0.184	0.186	0.152	0.11	0.115	0.166	0.193	0.165	0.103	0.105	0.132	0.116	0.517	0.726	0.177	0.148	0.105	0.099	0.115
07:39:22	0.739	0.688	0.244	0.151	0.235	0.239	0.112	0.103	0.1	0.096	0.129	0.111	0.333	0.385	0.093	0.096	0.101	0.098	0.122	0.132	0.1	0.099	0.234	0.319	0.109	0.115	0.17	0.149	0.099	0.095	0.198	0.201	0.16	0.113	0.12	0.176	0.209	0.177	0.105	0.107	0.138	0.119	0.56	0.781	0.191	0.156	0.107	0.1	0.12
07:49:22	0.783	0.728	0.276	0.167	0.251	0.254	0.115	0.104	0.101	0.096	0.131	0.111	0.354	0.409	0.093	0.096	0.103	0.099	0.124	0.131	0.101	0.099	0.253	0.343	0.112	0.119	0.181	0.159	0.099	0.096	0.213	0.217	0.169	0.116	0.125	0.189	0.225	0.19	0.106	0.109	0.144	0.123	0.605	0.839	0.204	0.166	0.11	0.1	0.126
07:59:22	0.834	0.762	0.31	0.186	0.269	0.269	0.119	0.106	0.102	0.097	0.133	0.113	0.373	0.434	0.093	0.096	0.105	0.101	0.127	0.131	0.102	0.099	0.271	0.368	0.115	0.124	0.194	0.169	0.099	0.096	0.228	0.233	0.178	0.12	0.132	0.202	0.242	0.204	0.107	0.111	0.151	0.128	0.655	0.9	0.22	0.176	0.113	0.101	0.133
08:09:22	0.906	0.828	0.355	0.208	0.286	0.283	0.122	0.107	0.103	0.097	0.136	0.114	0.395	0.459	0.093	0.095	0.106	0.102	0.13	0.136	0.103	0.1	0.291	0.392	0.118	0.13	0.207	0.18	0.099	0.096	0.241	0.249	0.188	0.124	0.14	0.216	0.261	0.219	0.108	0.113	0.159	0.132	0.706	0.966	0.239	0.19	0.114	0.102	0.141
08:19:22	0.998	0.915	0.401	0.235	0.305	0.299	0.127	0.11	0.104	0.098	0.139	0.116	0.418	0.485	0.093	0.096	0.109	0.104	0.134	0.14	0.105	0.1	0.311	0.418	0.124	0.136	0.22	0.192	0.099	0.097	0.258	0.266	0.198	0.13	0.148	0.231	0.281	0.235	0.11	0.116	0.168	0.138	0.76	1.033	0.258	0.204	0.117	0.103	0.151
08:29:22	1.117	1.026	0.452	0.267	0.324	0.316	0.131	0.112	0.104	0.098	0.142	0.117	0.442	0.511	0.093	0.096	0.112	0.106	0.14	0.145	0.107	0.101	0.332	0.444	0.129	0.143	0.235	0.205	0.1	0.097	0.274	0.283	0.208	0.135	0.158	0.248	0.302	0.252	0.113	0.119	0.178	0.143	0.818	1.103	0.28	0.22	0.121	0.104	0.161
08:39:22	1.223	1.157	0.502	0.305	0.345	0.334	0.136	0.114	0.105	0.099	0.144	0.119	0.466	0.536	0.093	0.096	0.115	0.108	0.143	0.151	0.109	0.101	0.353	0.47	0.135	0.151	0.251	0.219	0.1	0.098	0.289	0.299	0.22	0.142	0.169	0.262	0.326	0.27	0.115	0.123	0.188	0.149	0.882	1.165	0.304	0.236	0.125	0.106	0.174
08:49:22	1.296	1.265	0.564	0.351	0.364	0.351	0.141	0.117	0.106	0.1	0.148	0.12	0.49	0.563	0.093	0.096	0.119	0.111	0.149	0.158	0.112	0.102	0.376	0.494	0.142	0.159	0.267	0.233	0.1	0.099	0.307	0.317	0.23	0.149	0.181	0.278	0.352	0.289	0.117	0.127	0.2	0.156	0.944	1.227	0.328	0.257	0.129	0.108	0.187
08:59:22	1.347	1.333	0.622	0.399	0.386	0.369	0.145	0.12	0.107	0.1	0.152	0.121	0.515	0.589	0.093	0.096	0.123	0.115	0.154	0.165	0.115	0.102	0.4	0.517	0.149	0.167	0.285	0.249	0.1	0.1	0.325	0.336	0.241	0.157	0.193	0.296	0.379	0.31	0.121	0.132	0.213	0.163	1.01	1.286	0.357	0.279	0.134	0.109	0.202
09:09:22	1.389	1.381	0.686	0.46	0.409	0.389	0.151	0.124	0.109	0.1	0.156	0.122	0.541	0.615	0.093	0.096	0.129	0.118	0.161	0.172	0.119	0.103	0.425	0.54	0.157	0.177	0.304	0.266	0.101	0.101	0.344	0.357	0.253	0.166	0.207	0.314	0.408	0.333	0.124	0.136	0.226	0.172	1.073	1.342	0.384	0.301	0.139	0.111	0.217
09:19:22	1.428	1.419	0.765	0.51	0.428	0.409	0.157	0.127	0.108	0.101	0.16	0.124	0.569	0.642	0.093	0.096	0.134	0.123	0.168	0.18	0.123	0.105	0.451	0.56	0.166	0.187	0.325	0.283	0.102	0.102	0.365	0.378	0.266	0.174	0.222	0.331	0.44	0.358	0.128	0.141	0.243	0.182	1.135	1.4	0.413	0.325	0.145	0.114	0.235
09:29:22	1.462	1.453	0.867	0.559	0.451	0.428	0.162	0.132	0.109	0.102	0.165	0.127	0.598	0.669	0.093	0.096	0.141	0.128	0.175	0.189	0.129	0.106	0.479	0.579	0.175	0.199	0.347	0.304	0.103	0.104	0.386	0.401	0.279	0.184	0.237	0.35	0.473	0.386	0.132	0.146	0.26	0.194	1.2	1.453	0.443	0.352	0.15	0.118	0.255
09:39:22	1.491	1.483	0.971	0.614	0.475	0.444	0.169	0.136	0.111	0.103	0.17	0.131	0.63	0.699	0.093	0.096	0.148	0.134	0.183	0.199	0.134	0.108	0.508	0.599	0.185	0.212	0.371	0.325	0.103	0.106	0.409	0.425	0.291	0.193	0.253	0.368	0.511	0.415	0.136	0.152	0.279	0.208	1.265	1.496	0.473	0.377	0.157	0.122	0.275
09:49:22	1.516	1.509	1.086	0.693	0.497	0.46	0.177	0.14	0.112	0.104	0.174	0.131	0.667	0.732	0.093	0.096	0.157	0.141	0.192	0.209	0.141	0.109	0.537	0.621	0.196	0.227	0.397	0.347	0.105	0.107	0.434	0.451	0.306	0.204	0.27	0.383	0.551	0.445	0.14	0.159	0.299	0.222	1.333	1.537	0.504	0.403	0.165	0.127	0.295
09:59:22	1.535	1.53	1.179	0.763	0.511	0.478	0.186	0.145	0.113	0.104	0.178	0.135	0.707	0.766	0.093	0.096	0.166	0.148	0.202	0.22	0.148	0.111	0.571	0.648	0.209	0.243	0.425	0.371	0.106	0.11	0.459	0.478	0.321	0.215	0.287	0.4	0.594	0.478	0.144	0.166	0.319	0.239	1.4	1.569	0.536	0.43	0.173	0.132	0.318
10:09:22	1.553	1.546	1.264	0.863	0.532	0.491	0.195	0.148	0.115	0.104	0.184	0.138	0.751	0.801	0.093	0.096	0.176	0.157	0.211	0.232	0.156	0.113	0.603	0.685	0.223	0.262	0.454	0.396	0.108	0.113	0.484	0.506	0.337	0.227	0.305	0.417	0.643	0.513	0.149	0.175	0.341	0.256	1.46	1.597	0.57	0.457	0.185	0.138	0.341
10:19:22	1.57	1.562	1.327	0.991	0.546	0.508	0.206	0.153	0.118	0.106	0.19	0.142	0.798	0.839	0.093	0.096	0.187	0.166	0.222	0.244	0.166	0.116	0.641	0.729	0.238	0.282	0.486	0.424	0.11	0.116	0.51	0.534	0.354	0.24	0.324	0.435	0.697	0.552	0.155	0.183	0.365	0.276	1.517	1.626	0.609	0.487	0.197	0.146	0.365
10:29:22	1.586	1.577	1.381	1.097	0.557	0.523	0.219	0.158	0.121	0.106	0.195	0.149	0.845	0.876	0.093	0.095	0.198	0.176	0.233	0.258	0.175	0.119	0.679	0.784	0.255	0.303	0.519	0.452	0.112	0.12	0.536	0.562	0.372	0.252	0.342	0.455	0.757	0.596	0.16	0.19	0.39	0.296	1.567	1.658	0.652	0.516	0.21	0.155	0.39
10:39:22	1.601	1.59	1.427	1.235	0.564	0.538	0.233	0.165	0.123	0.108	0.202	0.156	0.891	0.913	0.093	0.096	0.212	0.188	0.246	0.27	0.186	0.122	0.726	0.853	0.274	0.326	0.553	0.484	0.115	0.124	0.562	0.589	0.39	0.266	0.362	0.475	0.815	0.643	0.169	0.199	0.418	0.318	1.615	1.689	0.696	0.545	0.228	0.167	0.417
10:49:22	1.615	1.602	1.464	1.322	0.567	0.555	0.245	0.172	0.127	0.11	0.207	0.154	0.938	0.948	0.093	0.096	0.225	0.199	0.257	0.285	0.198	0.126	0.775	0.939	0.294	0.35	0.591	0.516	0.118	0.129	0.587	0.618	0.41	0.28	0.382	0.494	0.873	0.694	0.18	0.209	0.448	0.342	1.654	1.73	0.748	0.576	0.249	0.179	0.445
10:59:22	1.63	1.612	1.488	1.389	0.572	0.57	0.256	0.179	0.131	0.112	0.211	0.161	0.983	0.982	0.093	0.096	0.239	0.212	0.27	0.298	0.211	0.131	0.83	1.047	0.315	0.376	0.63	0.552	0.121	0.134	0.608	0.642	0.432	0.295	0.403	0.514	0.93	0.747	0.183	0.223	0.479	0.366	1.688	1.771	0.801	0.609	0.272	0.195	0.473
11:09:22	1.643	1.621	1.503	1.44	0.572	0.585	0.266	0.188	0.136	0.114	0.215	0.168	1.028	1.013	0.093	0.096	0.255	0.227	0.284	0.314	0.226	0.136	0.891	1.165	0.338	0.404	0.671	0.59	0.125	0.139	0.631	0.666	0.453	0.309	0.424	0.533	0.984	0.801	0.193	0.235	0.512	0.393	1.717	1.81	0.86	0.646	0.296	0.213	0.504
11:19:22	1.655	1.63	1.521	1.482	0.572	0.599	0.274	0.197	0.142	0.118	0.22	0.175	1.069	1.04	0.093	0.096	0.271	0.242	0.297	0.329	0.242	0.14	0.951	1.275	0.363	0.432	0.712	0.629	0.129	0.145	0.652	0.69	0.476	0.325	0.446	0.55	1.035	0.854	0.204	0.249	0.548	0.421	1.744	1.837	0.92	0.685	0.323	0.235	0.537
11:29:22	1.663	1.639	1.537	1.518	0.576	0.612	0.281	0.207	0.148	0.121	0.228	0.175	1.106	1.065	0.093	0.095	0.288	0.258	0.312	0.345	0.261	0.146	1.02	1.367	0.389	0.462	0.754	0.67	0.133	0.152	0.674	0.712	0.499	0.341	0.47	0.571	1.086	0.902	0.214	0.267	0.586	0.453	1.766	1.853	0.979	0.728	0.351	0.26	0.576
11:39:22	1.671	1.646	1.555	1.543	0.582	0.627	0.291	0.218	0.155	0.126	0.233	0.186	1.142	1.087	0.093	0.096	0.306	0.276	0.326	0.361	0.282	0.153	1.087	1.431	0.417	0.494	0.797	0.713	0.138	0.159	0.697	0.736	0.522	0.357	0.495	0.587	1.135	0.949	0.226	0.282	0.624	0.487	1.781	1.868	1.034	0.777	0.379	0.289	0.612
11:49:22	1.678	1.653	1.571	1.563	0.592	0.642	0.308	0.232	0.164	0.13	0.243	0.194	1.172	1.108	0.093	0.095	0.325	0.293	0.341	0.377	0.304	0.16	1.155	1.475	0.445	0.526	0.839	0.755	0.143	0.166	0.721	0.761	0.546	0.376	0.52	0.604	1.182	0.993	0.24	0.3	0.66	0.524	1.796	1.873	1.084	0.826	0.408	0.322	0.655
11:59:22	1.683	1.659	1.589	1.583	0.602	0.656	0.331	0.244	0.175	0.135	0.248	0.204	1.204	1.126	0.093	0.095	0.345	0.312	0.356	0.394	0.327	0.168	1.222	1.502	0.473	0.56	0.882	0.796	0.149	0.175	0.748	0.789	0.571	0.394	0.548	0.625	1.225	1.036	0.251	0.318	0.696	0.563	1.807	1.881	1.13	0.876	0.439	0.359	0.696
12:09:22	1.689	1.664	1.605	1.598	0.611	0.67	0.356	0.257	0.185	0.142	0.258	0.214	1.232	1.143	0.093	0.096	0.366	0.332	0.372	0.411	0.352	0.176	1.284	1.522	0.502	0.594	0.924	0.839	0.156	0.184	0.776	0.819	0.598	0.412	0.573	0.648	1.265	1.077	0.269	0.335	0.735	0.599	1.817	1.887	1.171	0.927	0.472	0.399	0.736
12:19:22	1.693	1.668	1.621	1.611	0.623	0.682	0.379	0.27	0.195	0.15	0.268	0.233	1.257	1.158	0.093	0.095	0.389	0.354	0.388	0.428	0.377	0.187	1.34	1.537	0.533	0.628	0.964	0.882	0.161	0.193	0.805	0.85	0.625	0.432	0.602	0.68	1.302	1.116	0.285	0.354	0.774	0.633	1.826	1.892	1.209	0.978	0.508	0.441	0.784
12:29:22	1.698	1.671	1.634	1.626	0.636	0.696	0.402	0.285	0.209	0.16	0.28	0.24	1.28	1.173	0.093	0.095	0.412	0.376	0.405	0.445	0.404	0.198	1.387	1.549	0.564	0.662	1.003	0.923	0.168	0.201	0.836	0.883	0.653	0.453	0.629	0.715	1.335	1.152	0.303	0.371	0.817	0.669	1.833	1.893	1.241	1.024	0.544	0.485	0.839
12:39:22	1.701	1.674	1.649	1.639	0.648	0.706	0.428	0.303	0.222	0.167	0.294	0.256	1.3	1.185	0.093	0.096	0.438	0.4	0.421	0.465	0.431	0.21	1.43	1.561	0.596	0.698	1.041	0.965	0.175	0.211	0.867	0.917	0.682	0.472	0.654	0.759	1.365	1.188	0.319	0.388	0.864	0.706	1.839	1.893	1.27	1.068	0.583	0.531	0.899
12:49:22	1.703	1.675	1.661	1.648	0.662	0.718	0.459	0.324	0.237	0.178	0.31	0.267	1.319	1.198	0.093	0.096	0.464	0.424	0.438	0.484	0.456	0.223	1.466	1.568	0.63	0.73	1.077	1.005	0.184	0.223	0.897	0.95	0.712	0.495	0.681	0.804	1.392	1.22	0.339	0.408	0.915	0.752	1.841	1.892	1.294	1.107	0.623	0.579	0.97
12:59:22	1.705	1.676	1.671	1.656	0.676	0.731	0.488	0.344	0.255	0.191	0.325	0.275	1.336	1.208	0.093	0.096	0.495	0.447	0.456	0.504	0.484	0.238	1.5	1.574	0.662	0.764	1.111	1.045	0.192	0.234	0.926	0.984	0.742	0.517	0.71	0.854	1.414	1.247	0.36	0.426	0.967	0.808	1.843	1.89	1.315	1.143	0.664	0.629	1.055
13:09:22	1.706	1.676	1.68	1.658	0.688	0.739	0.517	0.362	0.277	0.202	0.338	0.276	1.351	1.219	0.093	0.096	0.528	0.469	0.474	0.525	0.514	0.255	1.527	1.575	0.688	0.798	1.143	1.082	0.202	0.246	0.955	1.017	0.77	0.541	0.737	0.906	1.433	1.272	0.38	0.444	1.023	0.869	1.845	1.888	1.334	1.176	0.705	0.676	1.15
13:19:22	1.707	1.675	1.686	1.657	0.699	0.749	0.54	0.388	0.307	0.216	0.352	0.267	1.366	1.229	0.093	0.096	0.564	0.492	0.492	0.546	0.539	0.273	1.55	1.574	0.714	0.829	1.171	1.118	0.213	0.259	0.981	1.048	0.8	0.564	0.767	0.966	1.448	1.291	0.4	0.462	1.08	0.932	1.847	1.886	1.35	1.206	0.745	0.725	1.248
13:29:22	1.707	1.676	1.695	1.654	0.708	0.756	0.57	0.411	0.322	0.233	0.364	0.271	1.379	1.239	0.093	0.096	0.604	0.516	0.51	0.567	0.566	0.292	1.572	1.569	0.736	0.862	1.196	1.148	0.223	0.274	1.006	1.078	0.829	0.591	0.8	1.035	1.461	1.303	0.421	0.481	1.134	0.996	1.849	1.886	1.364	1.234	0.787	0.777	1.341
13:39:22	1.706	1.677	1.7	1.653	0.717	0.764	0.609	0.435	0.344	0.251	0.38	0.283	1.39	1.246	0.094	0.096	0.649	0.544	0.529	0.586	0.589	0.314	1.59	1.563	0.756	0.895	1.218	1.177	0.235	0.289	1.029	1.107	0.856	0.617	0.833	1.118	1.472	1.312	0.442	0.5	1.186	1.056	1.852	1.885	1.377	1.258	0.83	0.834	1.424
13:49:22	1.706	1.679	1.702	1.654	0.734	0.771	0.649	0.461	0.366	0.271	0.39	0.296	1.401	1.255	0.093	0.096	0.695	0.574	0.548	0.61	0.617	0.337	1.607	1.563	0.775	0.928	1.236	1.202	0.249	0.305	1.051	1.132	0.883	0.644	0.868	1.207	1.482	1.32	0.463	0.52	1.236	1.117	1.852	1.884	1.388	1.28	0.872	0.888	1.495
13:59:22	1.705	1.681	1.704	1.656	0.743	0.777	0.688	0.485	0.39	0.293	0.398	0.305	1.412	1.262	0.093	0.095	0.74	0.602	0.568	0.633	0.645	0.362	1.623	1.556	0.798	0.962	1.251	1.224	0.264	0.322	1.069	1.156	0.907	0.672	0.905	1.293	1.492	1.327	0.482	0.539	1.285	1.174	1.855	1.883	1.396	1.297	0.914	0.953	1.551
14:09:22	1.706	1.684	1.705	1.663	0.754	0.781	0.72	0.514	0.418	0.315	0.416	0.343	1.421	1.269	0.093	0.096	0.782	0.632	0.588	0.658	0.684	0.389	1.637	1.557	0.817	0.999	1.263	1.243	0.279	0.337	1.087	1.177	0.93	0.7	0.943	1.369	1.503	1.337	0.503	0.558	1.329	1.228	1.855	1.883	1.406	1.315	0.958	1.021	1.599
14:19:22	1.706	1.688	1.702	1.668	0.76	0.784	0.751	0.542	0.45	0.336	0.43	0.395	1.43	1.275	0.093	0.096	0.825	0.662	0.61	0.683	0.729	0.416	1.649	1.562	0.841	1.038	1.273	1.26	0.293	0.356	1.102	1.196	0.951	0.727	0.983	1.436	1.511	1.348	0.523	0.578	1.371	1.28	1.856	1.883	1.412	1.329	0.999	1.075	1.638
14:29:22	1.706	1.691	1.695	1.673	0.763	0.788	0.796	0.587	0.486	0.356	0.452	0.461	1.437	1.281	0.093	0.096	0.869	0.696	0.632	0.706	0.782	0.446	1.661	1.562	0.868	1.077	1.278	1.272	0.309	0.374	1.116	1.212	0.97	0.756	1.02	1.488	1.521	1.358	0.542	0.599	1.414	1.328	1.859	1.882	1.419	1.342	1.042	1.125	1.669
14:39:22	1.706	1.694	1.691	1.677	0.773	0.789	0.848	0.638	0.529	0.383	0.476	0.518	1.445	1.288	0.093	0.096	0.917	0.731	0.654	0.733	0.842	0.474	1.672	1.568	0.899	1.12	1.285	1.284	0.325	0.392	1.127	1.228	0.986	0.784	1.059	1.534	1.53	1.369	0.561	0.621	1.451	1.372	1.859	1.883	1.425	1.353	1.08	1.167	1.697
14:49:22	1.708	1.696	1.688	1.68	0.779	0.79	0.897	0.67	0.562	0.407	0.512	0.576	1.451	1.293	0.093	0.096	0.967	0.767	0.675	0.758	0.906	0.501	1.684	1.582	0.926	1.166	1.288	1.291	0.344	0.411	1.138	1.242	1.002	0.81	1.099	1.569	1.538	1.38	0.582	0.64	1.487	1.413	1.86	1.882	1.433	1.363	1.117	1.205	1.718
14:59:22	1.71	1.7	1.69	1.682	0.787	0.794	0.944	0.695	0.593	0.434	0.545	0.635	1.458	1.299	0.093	0.096	1.016	0.81	0.701	0.785	0.97	0.526	1.692	1.605	0.966	1.209	1.294	1.295	0.361	0.432	1.149	1.253	1.014	0.838	1.135	1.599	1.546	1.389	0.604	0.663	1.517	1.451	1.86	1.881	1.439	1.372	1.152	1.247	1.736
15:09:22	1.712	1.702	1.694	1.685	0.796	0.799	0.987	0.721	0.631	0.463	0.592	0.717	1.465	1.303	0.093	0.096	1.069	0.859	0.725	0.81	1.031	0.554	1.701	1.639	1.02	1.253	1.3	1.3	0.379	0.454	1.156	1.264	1.026	0.862	1.172	1.626	1.553	1.398	0.625	0.685	1.546	1.483	1.861	1.879	1.447	1.378	1.186	1.288	1.752
15:19:22	1.715	1.706	1.701	1.69	0.808	0.804	1.031	0.757	0.661	0.492	0.629	0.83	1.47	1.309	0.093	0.096	1.124	0.909	0.746	0.837	1.092	0.584	1.708	1.67	1.087	1.3	1.303	1.303	0.399	0.477	1.164	1.273	1.038	0.885	1.207	1.647	1.56	1.407	0.647	0.709	1.571	1.513	1.861	1.877	1.453	1.385	1.217	1.33	1.765
15:29:22	1.717	1.709	1.703	1.693	0.821	0.806	1.081	0.805	0.693	0.529	0.66	0.916	1.476	1.312	0.093	0.096	1.179	0.962	0.77	0.861	1.152	0.621	1.716	1.699	1.164	1.344	1.307	1.308	0.42	0.5	1.171	1.282	1.047	0.907	1.243	1.665	1.567	1.416	0.669	0.731	1.593	1.538	1.861	1.876	1.459	1.392	1.247	1.37	1.776
15:39:22	1.718	1.711	1.705	1.698	0.832	0.808	1.086	0.844	0.747	0.573	0.688	0.936	1.48	1.316	0.093	0.096	1.231	1.015	0.79	0.886	1.206	0.659	1.723	1.725	1.243	1.392	1.311	1.313	0.442	0.527	1.177	1.29	1.057	0.928	1.278	1.682	1.573	1.424	0.692	0.755	1.611	1.56	1.86	1.873	1.467	1.397	1.272	1.407	1.787
15:49:22	1.719	1.715	1.709	1.705	0.844	0.808	1.105	0.893	0.811	0.617	0.72	0.972	1.485	1.319	0.093	0.096	1.281	1.072	0.814	0.911	1.26	0.706	1.728	1.759	1.326	1.44	1.317	1.317	0.464	0.553	1.183	1.297	1.063	0.945	1.31	1.696	1.582	1.432	0.715	0.78	1.626	1.579	1.86	1.873	1.472	1.405	1.295	1.442	1.793
15:59:22	1.721	1.716	1.712	1.709	0.852	0.81	1.134	0.942	0.86	0.661	0.765	1.005	1.49	1.322	0.094	0.096	1.329	1.133	0.84	0.936	1.31	0.763	1.734	1.789	1.407	1.481	1.321	1.32	0.488	0.579	1.188	1.302	1.07	0.962	1.342	1.707	1.587	1.441	0.739	0.805	1.64	1.596	1.858	1.869	1.479	1.41	1.317	1.476	1.799
16:09:22	1.723	1.72	1.716	1.714	0.858	0.812	1.16	0.995	0.922	0.706	0.811	1.042	1.493	1.326	0.093	0.096	1.373	1.192	0.862	0.961	1.359	0.826	1.739	1.81	1.479	1.526	1.326	1.327	0.514	0.608	1.193	1.309	1.076	0.977	1.367	1.718	1.593	1.45	0.764	0.831	1.652	1.612	1.856	1.866	1.483	1.417	1.338	1.505	1.804
16:19:22	1.725	1.722	1.72	1.718	0.858	0.814	1.197	1.049	0.982	0.759	0.887	1.086	1.497	1.329	0.093	0.096	1.413	1.245	0.885	0.987	1.403	0.89	1.743	1.824	1.546	1.57	1.33	1.332	0.54	0.638	1.196	1.313	1.081	0.991	1.393	1.727	1.599	1.457	0.787	0.853	1.661	1.624	1.854	1.863	1.488	1.423	1.353	1.528	1.804
16:29:22	1.726	1.723	1.724	1.723	0.861	0.815	1.231	1.098	1.093	0.797	0.95	1.152	1.5	1.332	0.093	0.096	1.45	1.294	0.908	1.01	1.443	0.953	1.747	1.837	1.602	1.614	1.334	1.335	0.569	0.667	1.2	1.318	1.085	1.002	1.414	1.732	1.605	1.465	0.811	0.88	1.669	1.635	1.853	1.862	1.494	1.43	1.368	1.547	1.804
16:39:22	1.728	1.725	1.727	1.725	0.864	0.818	1.277	1.141	1.188	0.842	0.966	1.215	1.503	1.336	0.093	0.096	1.484	1.339	0.932	1.033	1.484	1.016	1.749	1.845	1.655	1.653	1.338	1.339	0.6	0.698	1.204	1.321	1.089	1.014	1.434	1.739	1.611	1.472	0.835	0.906	1.676	1.644	1.85	1.859	1.497	1.434	1.381	1.564	1.804
16:49:22	1.729	1.726	1.735	1.731	0.868	0.819	1.332	1.177	1.306	0.879	0.95	1.259	1.506	1.339	0.093	0.095	1.515	1.381	0.953	1.057	1.518	1.075	1.752	1.85	1.699	1.685	1.342	1.341	0.631	0.729	1.206	1.325	1.092	1.023	1.452	1.742	1.618	1.481	0.86	0.93	1.684	1.652	1.849	1.857	1.501	1.44	1.392	1.578	1.801
16:59:22	1.731	1.727	1.741	1.739	0.869	0.818	1.423	1.201	1.399	0.909	0.957	1.307	1.507	1.342	0.093	0.095	1.543	1.419	0.974	1.079	1.551	1.133	1.752	1.857	1.74	1.713	1.347	1.347	0.664	0.762	1.21	1.329	1.095	1.032	1.466	1.749	1.622	1.489	0.885	0.953	1.688	1.658	1.849	1.854	1.504	1.446	1.402	1.589	1.797
17:09:22	1.732	1.729	1.745	1.745	0.871	0.821	1.528	1.223	1.5	0.954	0.969	1.354	1.509	1.345	0.093	0.096	1.567	1.453	0.995	1.103	1.578	1.189	1.755	1.863	1.766	1.729	1.35	1.351	0.698	0.795	1.212	1.331	1.098	1.04	1.481	1.752	1.629	1.497	0.907	0.977	1.692	1.662	1.847	1.853	1.507	1.45	1.411	1.599	1.793
17:19:22	1.734	1.731	1.748	1.749	0.873	0.821	1.62	1.239	1.583	1.049	0.984	1.39	1.511	1.349	0.093	0.096	1.59	1.487	1.021	1.126	1.601	1.242	1.754	1.869	1.757	1.741	1.354	1.356	0.734	0.825	1.215	1.333	1.1	1.046	1.491	1.757	1.634	1.505	0.931	1.002	1.697	1.668	1.847	1.851	1.513	1.455	1.419	1.608	1.79
17:29:22	1.736	1.731	1.752	1.752	0.876	0.822	1.682	1.255	1.652	1.161	1.004	1.44	1.513	1.352	0.093	0.095	1.609	1.517	1.041	1.148	1.626	1.29	1.757	1.871	1.723	1.747	1.357	1.361	0.771	0.855	1.217	1.335	1.101	1.052	1.502	1.764	1.64	1.515	0.954	1.024	1.699	1.671	1.846	1.85	1.518	1.458	1.425	1.615	1.785
17:39:22	1.738	1.733	1.756	1.76	0.879	0.825	1.732	1.278	1.701	1.371	1.028	1.494	1.516	1.355	0.094	0.096	1.627	1.54	1.065	1.17	1.644	1.336	1.759	1.873	1.719	1.742	1.361	1.364	0.807	0.884	1.22	1.337	1.104	1.057	1.51	1.767	1.647	1.525	0.977	1.046	1.703	1.673	1.845	1.848	1.526	1.462	1.431	1.619	1.781
17:49:22	1.74	1.733	1.759	1.759	0.881	0.828	1.768	1.378	1.736	1.508	1.062	1.538	1.518	1.357	0.093	0.096	1.643	1.563	1.087	1.192	1.662	1.377	1.76	1.873	1.737	1.743	1.363	1.367	0.843	0.912	1.221	1.339	1.105	1.061	1.516	1.772	1.654	1.535	0.999	1.068	1.705	1.676	1.843	1.846	1.533	1.466	1.437	1.625	1.777
17:59:22	1.742	1.736	1.763	1.757	0.881	0.83	1.795	1.548	1.76	1.594	1.069	1.568	1.521	1.359	0.093	0.096	1.657	1.585	1.11	1.213	1.678	1.416	1.762	1.873	1.765	1.746	1.367	1.371	0.878	0.94	1.222	1.34	1.107	1.064	1.525	1.775	1.661	1.544	1.021	1.088	1.708	1.679	1.843	1.846	1.541	1.47	1.441	1.628	1.773
18:09:22	1.742	1.738	1.767	1.756	0.883	0.832	1.815	1.646	1.78	1.658	1.086	1.592	1.523	1.362	0.093	0.096	1.667	1.602	1.13	1.235	1.694	1.452	1.763	1.872	1.786	1.748	1.369	1.375	0.915	0.966	1.224	1.342	1.107	1.067	1.532	1.777	1.67	1.555	1.041	1.109	1.709	1.68	1.843	1.844	1.551	1.472	1.444	1.635	1.77
18:19:22	1.74	1.739	1.769	1.763	0.887	0.839	1.833	1.707	1.796	1.712	1.107	1.62	1.527	1.365	0.093	0.096	1.678	1.617	1.154	1.256	1.707	1.486	1.763	1.872	1.787	1.748	1.371	1.378	0.949	0.991	1.226	1.343	1.109	1.07	1.535	1.78	1.679	1.564	1.059	1.127	1.711	1.682	1.843	1.843	1.561	1.478	1.448	1.639	1.768
18:29:22	1.737	1.741	1.771	1.761	0.886	0.84	1.849	1.749	1.807	1.747	1.126	1.635	1.529	1.368	0.093	0.096	1.688	1.632	1.177	1.276	1.718	1.514	1.764	1.871	1.791	1.749	1.372	1.381	0.982	1.016	1.229	1.345	1.11	1.073	1.542	1.782	1.69	1.576	1.078	1.146	1.712	1.682	1.843	1.841	1.572	1.483	1.452	1.638	1.766
18:39:22	1.733	1.742	1.773	1.764	0.888	0.841	1.86	1.781	1.816	1.772	1.14	1.657	1.532	1.371	0.093	0.095	1.696	1.644	1.2	1.295	1.728	1.542	1.765	1.869	1.792	1.749	1.376	1.384	1.014	1.038	1.23	1.346	1.112	1.075	1.547	1.784	1.699	1.586	1.095	1.162	1.712	1.684	1.842	1.839	1.584	1.49	1.456	1.641	1.765
18:49:22	1.729	1.743	1.776	1.771	0.89	0.841	1.87	1.805	1.826	1.791	1.159	1.669	1.535	1.373	0.093	0.095	1.703	1.655	1.222	1.316	1.737	1.566	1.764	1.867	1.791	1.747	1.377	1.386	1.044	1.059	1.231	1.347	1.112	1.077	1.551	1.787	1.708	1.596	1.112	1.178	1.714	1.684	1.84	1.837	1.597	1.498	1.459	1.643	1.764
18:59:22	1.724	1.744	1.778	1.775	0.888	0.843	1.877	1.825	1.834	1.807	1.168	1.667	1.536	1.375	0.093	0.095	1.709	1.664	1.243	1.334	1.746	1.589	1.764	1.866	1.788	1.748	1.379	1.389	1.073	1.079	1.233	1.348	1.113	1.079	1.556	1.787	1.717	1.605	1.126	1.192	1.714	1.685	1.84	1.835	1.609	1.504	1.463	1.647	1.763
19:09:22	1.719	1.745	1.781	1.774	0.89	0.847	1.883	1.84	1.844	1.82	1.185	1.661	1.538	1.377	0.093	0.095	1.715	1.672	1.264	1.351	1.753	1.608	1.764	1.864	1.785	1.748	1.38	1.39	1.101	1.099	1.234	1.349	1.115	1.08	1.558	1.789	1.725	1.616	1.14	1.207	1.715	1.685	1.841	1.835	1.621	1.512	1.467	1.649	1.764
19:19:22	1.714	1.747	1.783	1.776	0.894	0.851	1.889	1.854	1.855	1.832	1.198	1.648	1.541	1.38	0.093	0.096	1.72	1.68	1.287	1.37	1.76	1.625	1.763	1.863	1.782	1.749	1.381	1.392	1.127	1.116	1.236	1.349	1.117	1.082	1.561	1.79	1.733	1.625	1.154	1.22	1.715	1.686	1.841	1.834	1.632	1.521	1.469	1.649	1.766
19:29:22	1.71	1.746	1.785	1.78	0.898	0.858	1.892	1.865	1.863	1.841	1.209	1.598	1.543	1.382	0.093	0.096	1.725	1.687	1.305	1.386	1.765	1.643	1.762	1.861	1.781	1.75	1.381	1.394	1.152	1.133	1.238	1.35	1.119	1.083	1.564	1.79	1.738	1.635	1.165	1.23	1.715	1.685	1.84	1.833	1.643	1.53	1.472	1.648	1.767
19:39:22	1.708	1.747	1.787	1.778	0.896	0.859	1.897	1.875	1.874	1.851	1.224	1.547	1.545	1.383	0.093	0.096	1.728	1.693	1.327	1.402	1.769	1.658	1.762	1.858	1.779	1.751	1.383	1.396	1.174	1.148	1.239	1.351	1.119	1.085	1.568	1.792	1.744	1.644	1.177	1.241	1.714	1.685	1.839	1.832	1.654	1.539	1.474	1.65	1.768
19:49:22	1.708	1.75	1.788	1.774	0.896	0.863	1.9	1.882	1.884	1.859	1.232	1.554	1.547	1.385	0.093	0.096	1.732	1.699	1.345	1.418	1.774	1.672	1.762	1.857	1.78	1.752	1.383	1.397	1.197	1.168	1.24	1.352	1.12	1.086	1.572	1.79	1.75	1.653	1.186	1.251	1.714	1.685	1.839	1.831	1.663	1.549	1.477	1.649	1.772
19:59:22	1.708	1.75	1.788	1.782	0.898	0.871	1.904	1.889	1.889	1.868	1.236	1.497	1.549	1.387	0.093	0.096	1.735	1.704	1.362	1.432	1.776	1.684	1.761	1.854	1.78	1.754	1.384	1.398	1.217	1.182	1.242	1.353	1.122	1.087	1.574	1.791	1.756	1.66	1.195	1.26	1.714	1.685	1.839	1.831	1.67	1.559	1.478	1.65	1.776
20:09:22	1.708	1.752	1.787	1.793	0.902	0.882	1.906	1.894	1.896	1.877	1.243	1.54	1.55	1.389	0.093	0.096	1.738	1.708	1.38	1.446	1.78	1.696	1.76	1.852	1.782	1.756	1.386	1.4	1.236	1.193	1.243	1.353	1.123	1.088	1.578	1.792	1.761	1.669	1.204	1.267	1.712	1.684	1.839	1.829	1.679	1.568	1.479	1.654	1.78
20:19:22	1.71	1.754	1.787	1.799	0.892	0.89	1.907	1.899	1.9	1.884	1.255	1.676	1.553	1.391	0.093	0.096	1.739	1.71	1.397	1.458	1.783	1.705	1.759	1.849	1.784	1.759	1.387	1.401	1.254	1.205	1.244	1.355	1.125	1.089	1.579	1.79	1.766	1.675	1.212	1.275	1.712	1.683	1.839	1.828	1.685	1.578	1.48	1.654	1.783
20:29:22	1.712	1.755	1.784	1.795	0.907	0.901	1.908	1.901	1.903	1.892	1.283	1.716	1.555	1.393	0.093	0.096	1.742	1.714	1.411	1.469	1.786	1.716	1.759	1.845	1.787	1.761	1.389	1.402	1.27	1.217	1.246	1.355	1.125	1.09	1.581	1.79	1.77	1.679	1.22	1.281	1.711	1.683	1.839	1.828	1.691	1.587	1.48	1.656	1.787
20:39:22	1.717	1.755	1.782	1.794	0.915	0.905	1.908	1.904	1.906	1.897	1.276	1.724	1.557	1.395	0.093	0.096	1.744	1.718	1.428	1.479	1.79	1.724	1.759	1.843	1.79	1.763	1.39	1.403	1.286	1.227	1.247	1.355	1.126	1.091	1.583	1.79	1.773	1.683	1.226	1.287	1.711	1.683	1.839	1.827	1.697	1.597	1.481	1.654	1.791
20:49:22	1.718	1.756	1.782	1.793	0.934	0.925	1.907	1.909	1.909	1.902	1.285	1.744	1.559	1.398	0.093	0.096	1.744	1.72	1.441	1.488	1.792	1.731	1.757	1.84	1.795	1.766	1.391	1.405	1.3	1.238	1.248	1.356	1.126	1.092	1.584	1.79	1.775	1.686	1.231	1.291	1.709	1.683	1.84	1.827	1.704	1.605	1.48	1.656	1.794
20:59:22	1.72	1.757	1.784	1.791	0.967	0.962	1.906	1.909	1.91	1.904	1.293	1.756	1.56	1.4	0.093	0.096	1.746	1.722	1.453	1.496	1.794	1.738	1.758	1.839	1.8	1.77	1.393	1.407	1.313	1.246	1.25	1.357	1.128	1.093	1.586	1.789	1.778	1.69	1.236	1.295	1.709	1.682	1.839	1.827	1.708	1.614	1.479	1.65	1.8
21:09:22	1.722	1.756	1.784	1.794	0.99	1.008	1.906	1.911	1.911	1.906	1.303	1.746	1.563	1.402	0.093	0.096	1.747	1.724	1.465	1.504	1.796	1.744	1.757	1.835	1.805	1.772	1.393	1.408	1.326	1.254	1.251	1.358	1.128	1.095	1.587	1.79	1.779	1.693	1.239	1.299	1.709	1.681	1.841	1.827	1.714	1.623	1.478	1.631	1.804
21:19:22	1.722	1.757	1.783	1.801	1.065	1.03	1.904	1.913	1.911	1.907	1.318	1.732	1.565	1.404	0.093	0.096	1.747	1.726	1.477	1.511	1.797	1.749	1.757	1.835	1.809	1.775	1.394	1.408	1.338	1.262	1.253	1.358	1.129	1.096	1.589	1.788	1.781	1.695	1.242	1.303	1.708	1.681	1.84	1.827	1.719	1.629	1.479	1.617	1.807
21:29:22	1.721	1.756	1.782	1.802	1.138	1.061	1.904	1.913	1.912	1.91	1.327	1.729	1.567	1.406	0.094	0.096	1.748	1.727	1.486	1.517	1.798	1.754	1.757	1.834	1.815	1.779	1.395	1.409	1.348	1.268	1.254	1.36	1.131	1.098	1.59	1.79	1.782	1.698	1.244	1.307	1.708	1.683	1.841	1.827	1.722	1.636	1.478	1.58	1.811
21:39:22	1.72	1.752	1.784	1.799	1.18	1.105	1.903	1.914	1.911	1.91	1.33	1.709	1.569	1.408	0.093	0.096	1.748	1.728	1.494	1.522	1.798	1.759	1.758	1.832	1.82	1.781	1.396	1.409	1.357	1.273	1.255	1.361	1.13	1.098	1.591	1.789	1.783	1.698	1.247	1.31	1.707	1.682	1.841	1.827	1.727	1.643	1.478	1.555	1.814
21:49:22	1.718	1.749	1.785	1.796	1.19	1.127	1.904	1.914	1.912	1.912	1.338	1.692	1.571	1.41	0.093	0.096	1.749	1.729	1.503	1.527	1.797	1.763	1.759	1.829	1.825	1.784	1.396	1.41	1.366	1.278	1.257	1.361	1.132	1.1	1.593	1.79	1.783	1.7	1.251	1.313	1.706	1.682	1.843	1.827	1.73	1.65	1.478	1.502	1.818
21:59:22	1.722	1.747	1.785	1.797	1.206	1.137	1.904	1.913	1.911	1.913	1.345	1.696	1.573	1.412	0.093	0.096	1.748	1.73	1.508	1.531	1.8	1.764	1.759	1.829	1.829	1.788	1.397	1.41	1.375	1.283	1.257	1.363	1.133	1.101	1.595	1.788	1.783	1.7	1.253	1.314	1.707	1.682	1.842	1.827	1.735	1.656	1.478	1.523	1.821
22:09:22	1.723	1.744	1.785	1.804	1.205	1.133	1.904	1.914	1.912	1.914	1.366	1.673	1.575	1.414	0.093	0.096	1.748	1.73	1.515	1.534	1.801	1.768	1.759	1.827	1.834	1.791	1.398	1.411	1.381	1.286	1.259	1.363	1.133	1.101	1.595	1.787	1.783	1.7	1.254	1.316	1.706	1.683	1.842	1.828	1.738	1.66	1.478	1.589	1.823
22:19:22	1.726	1.741	1.784	1.807	1.224	1.135	1.903	1.913	1.912	1.913	1.368	1.659	1.577	1.415	0.093	0.096	1.748	1.73	1.52	1.538	1.802	1.772	1.759	1.825	1.839	1.795	1.398	1.411	1.387	1.289	1.26	1.364	1.135	1.102	1.596	1.786	1.783	1.7	1.257	1.318	1.705	1.683	1.843	1.827	1.74	1.667	1.478	1.652	1.825
22:29:22	1.73	1.74	1.783	1.804	1.246	1.138	1.903	1.913	1.904	1.912	1.355	1.655	1.579	1.417	0.093	0.096	1.748	1.732	1.525	1.541	1.802	1.774	1.76	1.825	1.842	1.798	1.397	1.411	1.391	1.293	1.261	1.365	1.135	1.103	1.597	1.785	1.784	1.7	1.261	1.32	1.705	1.682	1.845	1.828	1.744	1.672	1.479	1.687	1.828
22:39:22	1.73	1.736	1.779	1.804	1.269	1.121	1.902	1.912	1.894	1.912	1.282	1.652	1.581	1.419	0.093	0.096	1.746	1.731	1.53	1.544	1.802	1.776	1.76	1.822	1.846	1.801	1.398	1.411	1.395	1.296	1.261	1.365	1.135	1.103	1.598	1.786	1.784	1.7	1.264	1.321	1.705	1.683	1.845	1.829	1.746	1.677	1.478	1.728	1.83
22:49:22	1.73	1.733	1.78	1.809	1.29	1.099	1.902	1.911	1.898	1.912	1.238	1.654	1.582	1.42	0.093	0.096	1.746	1.731	1.533	1.546	1.804	1.778	1.76	1.822	1.851	1.805	1.398	1.412	1.399	1.298	1.262	1.367	1.137	1.104	1.6	1.786	1.785	1.701	1.266	1.322	1.704	1.682	1.845	1.828	1.75	1.682	1.479	1.763	1.833
22:59:22	1.732	1.732	1.782	1.814	1.309	1.089	1.901	1.911	1.907	1.913	1.178	1.664	1.584	1.422	0.093	0.096	1.744	1.731	1.536	1.549	1.805	1.781	1.761	1.821	1.855	1.809	1.398	1.412	1.402	1.301	1.263	1.368	1.137	1.105	1.602	1.79	1.785	1.7	1.268	1.324	1.704	1.683	1.847	1.83	1.752	1.687	1.478	1.785	1.836
23:09:22	1.732	1.731	1.782	1.815	1.321	1.075	1.9	1.911	1.922	1.91	1.173	1.675	1.583	1.424	0.093	0.096	1.744	1.73	1.539	1.55	1.805	1.782	1.761	1.82	1.859	1.811	1.398	1.412	1.406	1.302	1.264	1.37	1.139	1.105	1.601	1.79	1.785	1.7	1.27	1.325	1.704	1.683	1.847	1.831	1.755	1.691	1.479	1.801	1.839
23:19:22	1.734	1.73	1.783	1.813	1.33	1.083	1.899	1.91	1.931	1.912	1.151	1.669	1.584	1.425	0.093	0.096	1.743	1.728	1.543	1.553	1.806	1.783	1.761	1.819	1.863	1.816	1.399	1.412	1.408	1.305	1.264	1.37	1.139	1.106	1.604	1.79	1.786	1.699	1.272	1.325	1.703	1.683	1.849	1.831	1.757	1.696	1.479	1.816	1.841
23:29:22	1.736	1.729	1.784	1.816	1.323	1.07	1.899	1.91	1.936	1.912	1.093	1.672	1.584	1.428	0.093	0.096	1.74	1.728	1.545	1.556	1.807	1.784	1.761	1.818	1.867	1.817	1.399	1.412	1.41	1.307	1.264	1.371	1.141	1.107	1.606	1.79	1.786	1.699	1.274	1.326	1.702	1.683	1.85	1.828	1.759	1.7	1.48	1.828	1.844
23:39:22	1.738	1.728	1.783	1.822	1.302	1.085	1.899	1.911	1.935	1.917	1.107	1.672	1.585	1.429	0.093	0.096	1.739	1.727	1.547	1.558	1.808	1.787	1.761	1.817	1.872	1.821	1.399	1.412	1.412	1.308	1.265	1.374	1.14	1.108	1.605	1.791	1.787	1.698	1.276	1.327	1.701	1.684	1.849	1.829	1.761	1.704	1.48	1.836	1.846
23:49:22	1.739	1.727	1.782	1.827	1.205	1.081	1.899	1.909	1.932	1.922	1.201	1.667	1.586	1.43	0.093	0.096	1.738	1.726	1.55	1.561	1.809	1.788	1.761	1.814	1.877	1.823	1.399	1.413	1.415	1.31	1.264	1.375	1.141	1.108	1.606	1.793	1.787	1.697	1.279	1.327	1.7	1.684	1.849	1.832	1.763	1.708	1.481	1.844	1.849
23:59:22	1.74	1.73	1.784	1.825	1.133	1.184	1.899	1.909	1.928	1.932	1.184	1.67	1.586	1.432	0.093	0.096	1.735	1.725	1.553	1.562	1.81	1.789	1.762	1.813	1.881	1.825	1.399	1.412	1.416	1.312	1.264	1.377	1.142	1.109	1.608	1.794	1.787	1.696	1.28	1.328	1.7	1.683	1.85	1.83	1.765	1.71	1.482	1.85	1.851
1 day, 0:09:22	1.742	1.73	1.785	1.825	1.117	1.261	1.899	1.909	1.924	1.938	1.173	1.671	1.588	1.433	0.093	0.096	1.734	1.723	1.555	1.565	1.81	1.791	1.761	1.813	1.885	1.827	1.399	1.412	1.418	1.313	1.265	1.378	1.143	1.109	1.611	1.795	1.788	1.695	1.282	1.329	1.7	1.683	1.853	1.831	1.767	1.713	1.481	1.854	1.853
[truncated: 35 more columns]

## Sheet: NRS384-va4
Time	NRS384	NRS384-2	NRS384-4.1	NRS384-4.1-2	NRS384-4.2	NRS384-4.2-2	NRS384-4.3	NRS384-4.3-2	NRS384-4.4	NRS384-4.4-2	NRS384-4.5	NRS384-4.5-2	NRS384-4.6	NRS384-4.6-2	NRS384-4.7	NRS384-4.7-2	NRS384-4.8	NRS384-4.8-2	NRS384-4.9	NRS384-4.9-2	NRS384-4.10	NRS384-4.10-2	NRS384-4.11	NRS384-4.11-2	NRS384-4.12	NRS384-4.12-2	NRS384-4.13	NRS384-4.13-2	NRS384-4.14	NRS384-4.14-2	NRS384-4.15	NRS384-4.15-2	NRS384-4.16	NRS384-4.16-2	NRS384-4.17	NRS384-4.17-2	NRS384-4.18	NRS384-4.18-2	NRS384-4.19	NRS384-4.19-2	NRS384-4.20	NRS384-4.20-2	NRS384-4.21	NRS384-4.21-2	NRS384-4.22	NRS384-4.22-2	NRS384-4.23	NRS384-4.23-2	NRS384-4.24
00:00:00	0.097	0.097	0.109	0.127	0.111	0.119	0.13	0.102	0.117	0.11	0.102	0.103	0.103	0.101	0.115	0.116	0.093	0.098	0.094	0.104	0.098	0.094	0.096	0.095	0.095	0.094	0.092	0.095	0.098	0.096	0.107	0.097	0.093	0.096	0.095	0.097	0.095	0.096	0.122	0.096	0.092	0.093	0.095	0.098	0.096	0.093	0.094	0.095	0.095
00:09:03	0.097	0.097	0.109	0.127	0.111	0.119	0.13	0.102	0.117	0.11	0.102	0.103	0.103	0.101	0.115	0.116	0.093	0.098	0.094	0.104	0.098	0.094	0.096	0.095	0.095	0.094	0.092	0.095	0.098	0.096	0.107	0.097	0.093	0.096	0.095	0.097	0.095	0.096	0.122	0.096	0.092	0.093	0.095	0.098	0.096	0.093	0.094	0.095	0.095
00:19:03	0.097	0.097	0.11	0.13	0.112	0.121	0.134	0.102	0.118	0.111	0.102	0.104	0.104	0.101	0.117	0.119	0.093	0.098	0.094	0.104	0.099	0.094	0.096	0.095	0.094	0.094	0.092	0.099	0.098	0.096	0.109	0.097	0.094	0.096	0.095	0.097	0.095	0.096	0.122	0.096	0.092	0.093	0.095	0.098	0.096	0.093	0.095	0.095	0.098
00:29:03	0.098	0.097	0.113	0.13	0.114	0.124	0.138	0.103	0.121	0.112	0.103	0.106	0.106	0.102	0.119	0.122	0.093	0.099	0.094	0.105	0.098	0.094	0.096	0.096	0.095	0.094	0.092	0.095	0.098	0.096	0.11	0.098	0.094	0.097	0.096	0.098	0.096	0.097	0.122	0.096	0.092	0.093	0.095	0.098	0.096	0.094	0.095	0.095	0.099
00:39:03	0.099	0.097	0.116	0.137	0.116	0.128	0.144	0.104	0.125	0.113	0.104	0.108	0.107	0.102	0.124	0.126	0.093	0.1	0.094	0.106	0.099	0.094	0.096	0.096	0.095	0.094	0.093	0.095	0.098	0.096	0.113	0.099	0.094	0.096	0.096	0.098	0.096	0.097	0.125	0.097	0.092	0.093	0.095	0.099	0.096	0.093	0.095	0.095	0.1
00:49:03	0.1	0.097	0.12	0.144	0.119	0.134	0.152	0.106	0.13	0.115	0.106	0.11	0.11	0.103	0.13	0.131	0.093	0.101	0.094	0.108	0.099	0.101	0.097	0.096	0.095	0.095	0.092	0.094	0.098	0.096	0.115	0.099	0.094	0.096	0.096	0.1	0.097	0.098	0.129	0.097	0.092	0.093	0.096	0.1	0.096	0.094	0.095	0.096	0.102
00:59:03	0.102	0.099	0.127	0.156	0.124	0.141	0.163	0.108	0.138	0.119	0.108	0.113	0.113	0.105	0.136	0.138	0.093	0.103	0.094	0.11	0.1	0.104	0.098	0.096	0.095	0.095	0.094	0.095	0.099	0.097	0.119	0.1	0.094	0.097	0.097	0.101	0.098	0.099	0.136	0.098	0.093	0.093	0.097	0.102	0.096	0.094	0.096	0.096	0.102
01:09:03	0.105	0.1	0.135	0.172	0.131	0.151	0.177	0.111	0.148	0.124	0.112	0.118	0.118	0.107	0.146	0.148	0.093	0.106	0.094	0.113	0.1	0.103	0.099	0.097	0.096	0.096	0.093	0.096	0.099	0.097	0.124	0.102	0.094	0.097	0.098	0.103	0.099	0.1	0.146	0.099	0.093	0.094	0.097	0.104	0.097	0.094	0.096	0.098	0.103
01:19:03	0.11	0.1	0.146	0.191	0.139	0.165	0.196	0.114	0.161	0.13	0.116	0.124	0.124	0.109	0.16	0.161	0.094	0.109	0.095	0.117	0.101	0.103	0.1	0.098	0.097	0.097	0.095	0.096	0.1	0.097	0.129	0.103	0.094	0.097	0.099	0.106	0.101	0.102	0.156	0.1	0.093	0.094	0.098	0.106	0.097	0.094	0.097	0.099	0.104
01:29:03	0.114	0.102	0.159	0.216	0.15	0.184	0.22	0.12	0.177	0.139	0.122	0.132	0.133	0.113	0.177	0.178	0.094	0.114	0.095	0.123	0.102	0.102	0.102	0.099	0.098	0.098	0.094	0.097	0.1	0.098	0.136	0.106	0.094	0.097	0.1	0.11	0.103	0.103	0.168	0.101	0.093	0.094	0.1	0.11	0.097	0.095	0.098	0.1	0.105
01:39:03	0.12	0.109	0.177	0.247	0.166	0.207	0.252	0.126	0.198	0.151	0.13	0.142	0.145	0.117	0.2	0.2	0.094	0.12	0.095	0.131	0.103	0.102	0.104	0.101	0.099	0.1	0.094	0.104	0.101	0.099	0.145	0.109	0.094	0.097	0.102	0.115	0.106	0.106	0.183	0.103	0.093	0.094	0.103	0.114	0.098	0.095	0.099	0.102	0.107
01:49:03	0.128	0.118	0.201	0.282	0.186	0.239	0.29	0.135	0.225	0.165	0.141	0.156	0.161	0.123	0.23	0.229	0.094	0.129	0.095	0.141	0.105	0.096	0.107	0.104	0.1	0.102	0.094	0.099	0.102	0.1	0.157	0.112	0.095	0.097	0.104	0.121	0.109	0.109	0.201	0.105	0.093	0.094	0.105	0.119	0.098	0.096	0.101	0.105	0.108
01:59:03	0.14	0.149	0.231	0.326	0.211	0.277	0.336	0.147	0.256	0.183	0.156	0.174	0.182	0.132	0.264	0.262	0.094	0.141	0.096	0.153	0.106	0.096	0.11	0.107	0.102	0.105	0.095	0.101	0.104	0.102	0.17	0.117	0.094	0.097	0.107	0.129	0.113	0.112	0.222	0.107	0.093	0.094	0.109	0.127	0.099	0.097	0.103	0.108	0.111
02:09:03	0.158	0.174	0.268	0.378	0.243	0.322	0.395	0.164	0.292	0.206	0.174	0.198	0.209	0.143	0.306	0.303	0.094	0.157	0.097	0.17	0.109	0.097	0.116	0.112	0.105	0.109	0.097	0.104	0.106	0.104	0.186	0.123	0.095	0.098	0.112	0.141	0.119	0.116	0.248	0.11	0.094	0.095	0.114	0.138	0.1	0.098	0.106	0.113	0.114
02:19:03	0.18	0.178	0.313	0.439	0.281	0.378	0.463	0.185	0.333	0.233	0.199	0.226	0.244	0.16	0.355	0.351	0.095	0.179	0.098	0.192	0.112	0.097	0.123	0.118	0.109	0.115	0.097	0.106	0.11	0.108	0.205	0.129	0.095	0.098	0.117	0.156	0.126	0.122	0.279	0.114	0.094	0.095	0.122	0.152	0.102	0.1	0.11	0.119	0.118
02:29:03	0.21	0.184	0.369	0.502	0.328	0.439	0.535	0.212	0.382	0.263	0.229	0.259	0.287	0.182	0.414	0.407	0.095	0.206	0.099	0.217	0.116	0.098	0.133	0.126	0.115	0.123	0.099	0.109	0.115	0.112	0.228	0.137	0.096	0.099	0.125	0.175	0.135	0.128	0.315	0.119	0.094	0.095	0.132	0.17	0.104	0.102	0.115	0.126	0.123
02:39:03	0.249	0.19	0.431	0.574	0.385	0.501	0.613	0.243	0.435	0.298	0.265	0.298	0.34	0.209	0.48	0.472	0.096	0.237	0.101	0.246	0.121	0.103	0.146	0.136	0.121	0.132	0.102	0.109	0.121	0.118	0.254	0.147	0.096	0.099	0.136	0.197	0.146	0.137	0.358	0.125	0.094	0.095	0.146	0.194	0.106	0.104	0.123	0.136	0.131
02:49:03	0.298	0.198	0.5	0.652	0.447	0.577	0.699	0.279	0.492	0.34	0.308	0.347	0.405	0.244	0.547	0.535	0.097	0.277	0.103	0.279	0.128	0.099	0.163	0.15	0.13	0.146	0.105	0.117	0.129	0.127	0.284	0.158	0.097	0.1	0.149	0.224	0.16	0.148	0.409	0.133	0.094	0.096	0.163	0.223	0.109	0.108	0.132	0.15	0.142
02:59:03	0.362	0.208	0.575	0.735	0.514	0.659	0.792	0.323	0.555	0.386	0.359	0.403	0.477	0.288	0.621	0.604	0.098	0.325	0.106	0.317	0.137	0.1	0.183	0.167	0.143	0.164	0.109	0.126	0.141	0.138	0.318	0.172	0.099	0.101	0.166	0.253	0.175	0.161	0.469	0.143	0.094	0.096	0.185	0.258	0.114	0.113	0.144	0.167	0.155
03:09:03	0.437	0.227	0.658	0.817	0.594	0.742	0.885	0.376	0.623	0.438	0.418	0.464	0.555	0.342	0.697	0.675	0.1	0.377	0.11	0.36	0.148	0.101	0.205	0.186	0.158	0.186	0.114	0.133	0.155	0.152	0.356	0.188	0.1	0.102	0.187	0.289	0.194	0.176	0.537	0.157	0.095	0.096	0.211	0.302	0.119	0.119	0.159	0.187	0.174
03:19:03	0.518	0.254	0.742	0.899	0.68	0.828	0.978	0.437	0.695	0.492	0.484	0.527	0.639	0.412	0.772	0.75	0.103	0.439	0.115	0.405	0.163	0.104	0.232	0.211	0.177	0.213	0.121	0.147	0.172	0.17	0.398	0.207	0.102	0.105	0.21	0.332	0.216	0.193	0.617	0.175	0.095	0.097	0.244	0.353	0.127	0.128	0.178	0.212	0.193
03:29:03	0.576	0.285	0.825	0.978	0.772	0.914	1.071	0.503	0.772	0.547	0.554	0.602	0.72	0.494	0.846	0.826	0.106	0.506	0.121	0.454	0.181	0.107	0.263	0.239	0.2	0.243	0.128	0.162	0.192	0.19	0.445	0.228	0.105	0.107	0.236	0.38	0.238	0.212	0.696	0.199	0.095	0.097	0.284	0.416	0.137	0.14	0.201	0.239	0.216
03:39:03	0.621	0.32	0.909	1.052	0.864	0.997	1.16	0.574	0.851	0.612	0.632	0.681	0.796	0.587	0.924	0.9	0.111	0.575	0.129	0.509	0.204	0.111	0.299	0.275	0.226	0.281	0.142	0.162	0.213	0.212	0.496	0.251	0.108	0.111	0.267	0.436	0.264	0.232	0.778	0.228	0.095	0.097	0.332	0.488	0.149	0.153	0.23	0.273	0.245
03:49:03	0.669	0.365	0.99	1.12	0.959	1.071	1.241	0.657	0.934	0.684	0.721	0.767	0.883	0.688	0.995	0.971	0.117	0.652	0.139	0.564	0.23	0.115	0.342	0.318	0.256	0.324	0.153	0.187	0.239	0.24	0.553	0.278	0.113	0.116	0.304	0.496	0.291	0.252	0.864	0.262	0.095	0.098	0.39	0.566	0.165	0.169	0.257	0.31	0.277
03:59:03	0.752	0.422	1.069	1.179	1.046	1.138	1.31	0.751	1.008	0.766	0.816	0.858	0.985	0.789	1.065	1.036	0.125	0.73	0.151	0.634	0.26	0.122	0.391	0.365	0.293	0.377	0.163	0.212	0.268	0.272	0.614	0.308	0.12	0.122	0.346	0.56	0.325	0.276	0.949	0.305	0.095	0.098	0.46	0.659	0.182	0.187	0.293	0.356	0.314
04:09:03	0.87	0.498	1.143	1.234	1.125	1.199	1.368	0.854	1.077	0.851	0.914	0.957	1.087	0.889	1.129	1.095	0.135	0.804	0.164	0.698	0.293	0.131	0.449	0.42	0.333	0.439	0.177	0.217	0.304	0.309	0.68	0.342	0.128	0.131	0.396	0.632	0.361	0.302	1.03	0.354	0.095	0.099	0.538	0.756	0.201	0.207	0.332	0.408	0.358
04:19:03	0.97	0.573	1.21	1.282	1.196	1.254	1.42	0.964	1.14	0.933	1.015	1.054	1.179	0.983	1.185	1.152	0.148	0.888	0.18	0.773	0.33	0.141	0.513	0.483	0.38	0.508	0.191	0.239	0.344	0.352	0.752	0.38	0.139	0.142	0.455	0.71	0.404	0.332	1.113	0.412	0.096	0.099	0.629	0.857	0.221	0.23	0.379	0.47	0.405
04:29:03	1.06	0.64	1.273	1.321	1.263	1.305	1.465	1.075	1.197	1.011	1.111	1.141	1.255	1.092	1.232	1.198	0.164	0.974	0.197	0.853	0.369	0.155	0.582	0.555	0.435	0.589	0.209	0.26	0.389	0.404	0.83	0.423	0.152	0.155	0.518	0.792	0.45	0.364	1.193	0.481	0.096	0.1	0.727	0.96	0.246	0.257	0.435	0.533	0.466
04:39:03	1.141	0.719	1.331	1.359	1.323	1.35	1.506	1.18	1.248	1.083	1.2	1.219	1.319	1.201	1.273	1.238	0.181	1.047	0.215	0.937	0.413	0.172	0.664	0.659	0.499	0.677	0.229	0.277	0.443	0.467	0.914	0.47	0.168	0.172	0.59	0.879	0.515	0.403	1.263	0.556	0.096	0.1	0.825	1.06	0.275	0.286	0.5	0.608	0.532
04:49:03	1.213	0.682	1.384	1.392	1.375	1.391	1.543	1.271	1.294	1.148	1.276	1.289	1.371	1.296	1.31	1.276	0.201	1.107	0.232	1.001	0.461	0.192	0.75	0.719	0.574	0.77	0.247	0.291	0.504	0.532	0.999	0.523	0.184	0.188	0.668	0.968	0.571	0.445	1.325	0.63	0.096	0.101	0.925	1.151	0.306	0.321	0.567	0.686	0.606
04:59:03	1.274	0.759	1.433	1.424	1.419	1.427	1.576	1.349	1.336	1.209	1.343	1.348	1.419	1.373	1.339	1.309	0.224	1.162	0.25	1.064	0.515	0.215	0.838	0.802	0.655	0.861	0.273	0.277	0.571	0.609	1.082	0.582	0.201	0.205	0.752	1.05	0.617	0.493	1.379	0.709	0.097	0.102	1.024	1.228	0.343	0.361	0.644	0.769	0.688
05:09:03	1.326	0.87	1.477	1.453	1.456	1.46	1.605	1.416	1.375	1.265	1.403	1.401	1.463	1.433	1.367	1.335	0.25	1.209	0.268	1.114	0.577	0.24	0.948	0.895	0.743	0.941	0.296	0.305	0.642	0.69	1.159	0.649	0.221	0.224	0.839	1.119	0.673	0.533	1.427	0.787	0.097	0.103	1.114	1.29	0.385	0.408	0.725	0.851	0.772
05:19:03	1.368	0.98	1.519	1.48	1.49	1.491	1.63	1.472	1.409	1.317	1.454	1.447	1.497	1.484	1.391	1.357	0.28	1.252	0.293	1.163	0.645	0.268	1.02	0.982	0.827	1.014	0.327	0.328	0.719	0.781	1.226	0.723	0.235	0.241	0.926	1.185	0.736	0.575	1.465	0.864	0.098	0.104	1.193	1.343	0.436	0.461	0.806	0.942	0.863
05:29:03	1.405	1.079	1.557	1.506	1.52	1.519	1.652	1.519	1.441	1.362	1.498	1.485	1.53	1.533	1.415	1.378	0.314	1.289	0.306	1.206	0.719	0.297	1.109	1.069	0.909	1.085	0.362	0.347	0.796	0.87	1.292	0.804	0.25	0.255	1.011	1.243	0.802	0.624	1.489	0.94	0.098	0.106	1.259	1.387	0.488	0.515	0.894	1.025	0.951
05:39:03	1.442	1.167	1.589	1.527	1.549	1.545	1.671	1.56	1.472	1.403	1.536	1.519	1.56	1.575	1.437	1.397	0.354	1.319	0.334	1.244	0.8	0.328	1.172	1.151	0.98	1.156	0.409	0.38	0.879	0.961	1.351	0.891	0.265	0.272	1.089	1.294	0.867	0.675	1.509	1.021	0.098	0.108	1.313	1.426	0.551	0.578	0.98	1.104	1.033
05:49:03	1.472	1.24	1.619	1.545	1.573	1.569	1.688	1.596	1.499	1.438	1.568	1.548	1.584	1.612	1.46	1.415	0.401	1.346	0.369	1.275	0.887	0.361	1.232	1.222	1.05	1.225	0.459	0.401	0.957	1.045	1.406	0.979	0.28	0.281	1.16	1.339	0.932	0.732	1.526	1.105	0.099	0.11	1.357	1.458	0.613	0.646	1.062	1.17	1.112
05:59:03	1.498	1.3	1.645	1.565	1.595	1.593	1.703	1.629	1.525	1.471	1.598	1.575	1.608	1.643	1.48	1.432	0.452	1.367	0.414	1.301	0.974	0.396	1.282	1.282	1.111	1.289	0.515	0.436	1.037	1.121	1.451	1.068	0.301	0.301	1.223	1.375	0.992	0.792	1.541	1.19	0.099	0.113	1.396	1.486	0.686	0.719	1.132	1.227	1.18
06:09:03	1.519	1.349	1.669	1.583	1.615	1.614	1.718	1.657	1.547	1.501	1.624	1.6	1.627	1.669	1.497	1.447	0.511	1.386	0.464	1.328	1.056	0.433	1.327	1.335	1.175	1.354	0.581	0.475	1.101	1.191	1.484	1.156	0.323	0.313	1.276	1.411	1.052	0.852	1.554	1.264	0.101	0.117	1.428	1.51	0.759	0.791	1.196	1.279	1.244
06:19:03	1.537	1.398	1.69	1.6	1.635	1.636	1.731	1.683	1.568	1.529	1.647	1.621	1.644	1.692	1.512	1.46	0.576	1.405	0.519	1.351	1.137	0.473	1.366	1.383	1.243	1.411	0.655	0.512	1.16	1.25	1.512	1.237	0.352	0.327	1.325	1.437	1.106	0.915	1.563	1.323	0.101	0.121	1.455	1.53	0.833	0.867	1.249	1.324	1.293
06:29:03	1.547	1.436	1.707	1.617	1.653	1.654	1.744	1.705	1.587	1.552	1.668	1.64	1.657	1.713	1.525	1.47	0.648	1.419	0.574	1.373	1.212	0.513	1.397	1.425	1.303	1.459	0.73	0.555	1.213	1.302	1.54	1.305	0.386	0.362	1.365	1.459	1.156	0.976	1.57	1.369	0.102	0.126	1.478	1.55	0.913	0.943	1.296	1.362	1.337
06:39:03	1.562	1.472	1.721	1.633	1.672	1.672	1.757	1.723	1.604	1.576	1.686	1.654	1.669	1.732	1.54	1.482	0.725	1.433	0.633	1.393	1.286	0.556	1.421	1.461	1.357	1.501	0.801	0.605	1.262	1.348	1.562	1.359	0.438	0.393	1.399	1.478	1.2	1.034	1.579	1.403	0.103	0.133	1.499	1.565	0.987	1.014	1.337	1.393	1.374
06:49:03	1.574	1.501	1.733	1.647	1.69	1.69	1.767	1.736	1.623	1.596	1.701	1.668	1.681	1.745	1.556	1.491	0.805	1.446	0.692	1.414	1.349	0.603	1.439	1.491	1.405	1.54	0.871	0.66	1.305	1.385	1.585	1.409	0.485	0.44	1.426	1.496	1.243	1.088	1.579	1.427	0.105	0.142	1.517	1.579	1.053	1.076	1.371	1.42	1.407
06:59:03	1.584	1.534	1.742	1.661	1.708	1.704	1.779	1.753	1.64	1.614	1.715	1.683	1.692	1.76	1.567	1.502	0.886	1.456	0.752	1.429	1.401	0.653	1.457	1.516	1.446	1.574	0.938	0.719	1.342	1.419	1.603	1.448	0.55	0.49	1.447	1.509	1.278	1.144	1.586	1.448	0.107	0.151	1.534	1.587	1.111	1.136	1.401	1.443	1.433
07:09:03	1.594	1.556	1.749	1.675	1.726	1.718	1.792	1.763	1.657	1.634	1.728	1.694	1.702	1.773	1.581	1.513	0.961	1.462	0.817	1.442	1.447	0.709	1.47	1.538	1.484	1.602	1.004	0.781	1.372	1.446	1.619	1.481	0.61	0.542	1.466	1.523	1.311	1.194	1.59	1.464	0.109	0.164	1.549	1.595	1.162	1.189	1.423	1.464	1.458
07:19:03	1.6	1.575	1.757	1.685	1.739	1.73	1.801	1.775	1.674	1.652	1.741	1.706	1.711	1.782	1.596	1.524	1.038	1.47	0.886	1.454	1.485	0.769	1.484	1.557	1.515	1.627	1.067	0.845	1.398	1.467	1.632	1.507	0.673	0.594	1.484	1.534	1.341	1.242	1.596	1.48	0.113	0.176	1.558	1.606	1.212	1.238	1.445	1.482	1.48
07:29:03	1.605	1.594	1.77	1.698	1.753	1.743	1.807	1.786	1.691	1.67	1.752	1.716	1.72	1.792	1.61	1.537	1.106	1.477	0.948	1.464	1.52	0.834	1.496	1.574	1.543	1.648	1.124	0.909	1.42	1.485	1.642	1.531	0.73	0.65	1.498	1.544	1.369	1.286	1.594	1.493	0.115	0.192	1.567	1.615	1.256	1.283	1.464	1.502	1.5
07:39:03	1.607	1.608	1.78	1.71	1.766	1.753	1.813	1.796	1.705	1.688	1.764	1.728	1.727	1.802	1.622	1.547	1.164	1.483	1.006	1.477	1.55	0.903	1.502	1.591	1.565	1.667	1.174	0.971	1.437	1.501	1.651	1.554	0.793	0.712	1.51	1.55	1.394	1.327	1.594	1.505	0.119	0.21	1.575	1.622	1.295	1.322	1.481	1.515	1.518
07:49:03	1.614	1.619	1.789	1.723	1.776	1.764	1.817	1.803	1.72	1.704	1.773	1.739	1.734	1.812	1.637	1.557	1.212	1.489	1.056	1.492	1.576	0.969	1.508	1.604	1.586	1.685	1.223	1.029	1.453	1.516	1.659	1.573	0.852	0.773	1.52	1.56	1.424	1.366	1.589	1.515	0.125	0.23	1.583	1.628	1.328	1.355	1.496	1.526	1.531
07:59:03	1.62	1.634	1.796	1.733	1.783	1.773	1.823	1.809	1.736	1.72	1.782	1.747	1.742	1.823	1.648	1.569	1.253	1.495	1.105	1.505	1.598	1.036	1.513	1.614	1.605	1.701	1.261	1.086	1.465	1.529	1.664	1.589	0.901	0.835	1.529	1.568	1.444	1.404	1.595	1.522	0.129	0.253	1.594	1.636	1.355	1.383	1.508	1.536	1.542
08:09:03	1.621	1.643	1.807	1.746	1.794	1.785	1.839	1.815	1.745	1.735	1.791	1.756	1.748	1.827	1.663	1.577	1.288	1.502	1.145	1.518	1.616	1.107	1.519	1.623	1.622	1.715	1.296	1.141	1.479	1.54	1.67	1.604	0.955	0.891	1.538	1.576	1.462	1.438	1.597	1.526	0.136	0.28	1.602	1.646	1.379	1.407	1.518	1.546	1.553
08:19:03	1.624	1.65	1.816	1.757	1.803	1.795	1.834	1.823	1.757	1.748	1.8	1.764	1.756	1.832	1.674	1.587	1.32	1.508	1.185	1.529	1.629	1.186	1.524	1.631	1.638	1.727	1.324	1.19	1.489	1.55	1.677	1.619	1.003	0.945	1.545	1.583	1.48	1.466	1.602	1.53	0.144	0.309	1.608	1.653	1.402	1.428	1.529	1.555	1.564
08:29:03	1.623	1.657	1.821	1.766	1.811	1.804	1.838	1.825	1.768	1.771	1.805	1.78	1.763	1.835	1.685	1.598	1.346	1.514	1.22	1.541	1.64	1.26	1.53	1.64	1.653	1.737	1.349	1.234	1.499	1.556	1.679	1.629	1.048	0.999	1.554	1.59	1.491	1.495	1.601	1.533	0.153	0.34	1.614	1.656	1.421	1.445	1.536	1.565	1.571
08:39:03	1.634	1.667	1.829	1.775	1.818	1.812	1.84	1.827	1.777	1.773	1.815	1.78	1.769	1.84	1.697	1.607	1.369	1.519	1.254	1.552	1.651	1.329	1.534	1.646	1.666	1.747	1.371	1.275	1.509	1.561	1.679	1.639	1.09	1.046	1.561	1.596	1.504	1.521	1.609	1.534	0.164	0.374	1.625	1.662	1.438	1.461	1.549	1.573	1.583
08:49:03	1.632	1.675	1.834	1.784	1.825	1.819	1.842	1.836	1.783	1.783	1.822	1.787	1.775	1.844	1.71	1.616	1.39	1.526	1.283	1.562	1.66	1.39	1.538	1.653	1.676	1.758	1.395	1.31	1.511	1.567	1.679	1.649	1.13	1.093	1.569	1.606	1.521	1.546	1.618	1.535	0.176	0.411	1.633	1.668	1.451	1.478	1.555	1.583	1.592
08:59:03	1.634	1.68	1.838	1.792	1.831	1.824	1.845	1.843	1.793	1.792	1.827	1.794	1.781	1.85	1.714	1.626	1.405	1.532	1.307	1.574	1.666	1.44	1.545	1.66	1.685	1.766	1.417	1.341	1.517	1.573	1.681	1.655	1.164	1.129	1.576	1.614	1.535	1.567	1.615	1.539	0.19	0.452	1.636	1.675	1.464	1.492	1.565	1.59	1.6
09:09:03	1.64	1.684	1.842	1.798	1.836	1.828	1.846	1.838	1.796	1.799	1.83	1.799	1.786	1.85	1.727	1.633	1.419	1.538	1.328	1.586	1.673	1.483	1.548	1.669	1.694	1.773	1.438	1.373	1.522	1.578	1.679	1.656	1.191	1.164	1.585	1.622	1.55	1.584	1.622	1.548	0.206	0.496	1.642	1.678	1.478	1.505	1.572	1.599	1.608
09:19:03	1.638	1.691	1.844	1.804	1.841	1.831	1.849	1.841	1.801	1.807	1.835	1.809	1.792	1.851	1.732	1.642	1.434	1.543	1.347	1.594	1.678	1.521	1.551	1.671	1.702	1.78	1.457	1.401	1.529	1.58	1.679	1.665	1.213	1.198	1.593	1.63	1.562	1.601	1.625	1.552	0.224	0.543	1.648	1.683	1.484	1.514	1.58	1.607	1.616
09:29:03	1.641	1.697	1.846	1.809	1.844	1.834	1.85	1.839	1.809	1.813	1.839	1.807	1.795	1.853	1.744	1.65	1.446	1.548	1.364	1.606	1.684	1.556	1.557	1.679	1.712	1.787	1.476	1.424	1.532	1.588	1.679	1.67	1.233	1.222	1.602	1.633	1.575	1.613	1.625	1.557	0.243	0.593	1.655	1.688	1.494	1.522	1.588	1.614	1.627
09:39:03	1.644	1.698	1.847	1.815	1.847	1.837	1.853	1.845	1.81	1.819	1.841	1.811	1.798	1.855	1.751	1.659	1.457	1.553	1.383	1.613	1.688	1.586	1.56	1.685	1.718	1.796	1.492	1.444	1.536	1.591	1.677	1.676	1.248	1.243	1.614	1.641	1.59	1.627	1.628	1.561	0.268	0.645	1.658	1.692	1.502	1.528	1.594	1.622	1.634
09:49:03	1.648	1.7	1.849	1.819	1.85	1.841	1.855	1.835	1.813	1.822	1.843	1.814	1.802	1.855	1.752	1.666	1.467	1.559	1.396	1.621	1.694	1.615	1.564	1.691	1.724	1.801	1.51	1.472	1.54	1.595	1.676	1.677	1.262	1.262	1.62	1.644	1.601	1.638	1.629	1.56	0.29	0.701	1.664	1.696	1.509	1.535	1.602	1.629	1.641
09:59:03	1.652	1.701	1.85	1.825	1.852	1.843	1.857	1.836	1.816	1.825	1.845	1.817	1.805	1.856	1.759	1.674	1.474	1.565	1.41	1.629	1.698	1.637	1.569	1.697	1.73	1.807	1.527	1.483	1.544	1.6	1.674	1.68	1.279	1.277	1.627	1.651	1.613	1.647	1.626	1.563	0.317	0.757	1.669	1.699	1.513	1.54	1.609	1.635	1.647
10:09:03	1.652	1.703	1.85	1.828	1.853	1.846	1.859	1.837	1.819	1.826	1.847	1.821	1.808	1.857	1.763	1.682	1.479	1.57	1.427	1.638	1.702	1.655	1.573	1.702	1.736	1.811	1.543	1.499	1.549	1.603	1.674	1.678	1.29	1.29	1.635	1.654	1.615	1.658	1.623	1.567	0.349	0.816	1.676	1.701	1.519	1.546	1.617	1.644	1.655
10:19:03	1.655	1.707	1.851	1.831	1.855	1.847	1.86	1.837	1.821	1.828	1.85	1.822	1.81	1.857	1.773	1.69	1.485	1.577	1.437	1.646	1.706	1.669	1.577	1.708	1.742	1.817	1.563	1.517	1.551	1.607	1.675	1.676	1.304	1.307	1.643	1.658	1.62	1.684	1.623	1.569	0.379	0.875	1.678	1.706	1.527	1.551	1.621	1.648	1.676
10:29:03	1.654	1.712	1.853	1.833	1.856	1.85	1.861	1.838	1.825	1.829	1.851	1.826	1.812	1.859	1.776	1.699	1.492	1.583	1.447	1.655	1.711	1.682	1.581	1.712	1.75	1.822	1.579	1.521	1.557	1.612	1.671	1.676	1.313	1.321	1.648	1.662	1.635	1.696	1.622	1.573	0.411	0.937	1.682	1.709	1.534	1.558	1.629	1.658	1.668
10:39:03	1.652	1.714	1.853	1.835	1.857	1.851	1.861	1.837	1.826	1.83	1.853	1.829	1.812	1.861	1.782	1.706	1.497	1.588	1.46	1.662	1.714	1.692	1.583	1.716	1.756	1.829	1.595	1.526	1.557	1.615	1.672	1.673	1.322	1.332	1.655	1.662	1.635	1.718	1.622	1.573	0.444	1	1.685	1.711	1.54	1.564	1.637	1.66	1.686
10:49:03	1.651	1.716	1.853	1.836	1.858	1.852	1.859	1.838	1.828	1.832	1.855	1.831	1.815	1.861	1.789	1.714	1.503	1.595	1.471	1.672	1.719	1.701	1.587	1.72	1.759	1.833	1.607	1.538	1.563	1.619	1.672	1.671	1.336	1.341	1.659	1.665	1.639	1.725	1.622	1.574	0.484	1.062	1.689	1.713	1.546	1.57	1.64	1.668	1.679
10:59:03	1.652	1.716	1.852	1.835	1.86	1.851	1.856	1.837	1.829	1.832	1.855	1.834	1.815	1.862	1.789	1.722	1.509	1.602	1.487	1.68	1.723	1.708	1.59	1.724	1.763	1.84	1.617	1.55	1.563	1.621	1.67	1.67	1.338	1.352	1.666	1.665	1.645	1.748	1.624	1.579	0.521	1.125	1.695	1.717	1.552	1.575	1.646	1.671	1.686
11:09:03	1.649	1.716	1.852	1.834	1.859	1.851	1.856	1.837	1.829	1.833	1.857	1.836	1.816	1.863	1.795	1.729	1.518	1.606	1.498	1.688	1.728	1.715	1.593	1.726	1.772	1.843	1.63	1.562	1.571	1.627	1.669	1.668	1.341	1.359	1.67	1.668	1.656	1.76	1.627	1.582	0.563	1.187	1.701	1.72	1.556	1.581	1.651	1.675	1.692
11:19:03	1.645	1.718	1.849	1.833	1.859	1.848	1.856	1.837	1.83	1.832	1.856	1.837	1.817	1.865	1.8	1.737	1.523	1.615	1.511	1.693	1.732	1.72	1.596	1.729	1.776	1.85	1.64	1.576	1.571	1.63	1.668	1.666	1.346	1.363	1.675	1.668	1.655	1.73	1.627	1.58	0.606	1.247	1.703	1.725	1.558	1.587	1.659	1.681	1.718
11:29:03	1.642	1.716	1.849	1.834	1.855	1.845	1.855	1.839	1.829	1.831	1.857	1.839	1.818	1.865	1.802	1.743	1.527	1.621	1.524	1.701	1.736	1.724	1.599	1.731	1.777	1.848	1.646	1.586	1.575	1.633	1.668	1.665	1.354	1.371	1.678	1.669	1.66	1.763	1.632	1.585	0.649	1.307	1.704	1.732	1.563	1.597	1.662	1.686	1.702
11:39:03	1.64	1.71	1.844	1.835	1.855	1.842	1.854	1.84	1.829	1.83	1.858	1.84	1.819	1.866	1.806	1.75	1.531	1.631	1.54	1.705	1.74	1.729	1.601	1.734	1.779	1.851	1.649	1.59	1.579	1.636	1.667	1.664	1.363	1.378	1.683	1.669	1.662	1.77	1.632	1.586	0.694	1.362	1.708	1.729	1.569	1.597	1.667	1.692	1.726
11:49:03	1.637	1.709	1.843	1.839	1.848	1.841	1.854	1.839	1.832	1.828	1.858	1.839	1.816	1.867	1.81	1.757	1.537	1.636	1.548	1.71	1.744	1.734	1.604	1.736	1.785	1.853	1.657	1.595	1.584	1.64	1.668	1.663	1.371	1.385	1.687	1.672	1.665	1.769	1.633	1.589	0.74	1.411	1.712	1.732	1.577	1.604	1.673	1.702	1.726
11:59:03	1.636	1.709	1.841	1.843	1.844	1.842	1.853	1.841	1.835	1.829	1.857	1.839	1.814	1.867	1.814	1.763	1.544	1.643	1.559	1.716	1.747	1.737	1.608	1.739	1.787	1.853	1.662	1.605	1.587	1.643	1.669	1.661	1.378	1.393	1.692	1.672	1.669	1.732	1.637	1.589	0.79	1.456	1.716	1.739	1.582	1.611	1.68	1.705	1.72
12:09:03	1.636	1.709	1.839	1.845	1.841	1.844	1.853	1.839	1.839	1.832	1.857	1.837	1.811	1.867	1.815	1.769	1.55	1.651	1.572	1.722	1.752	1.743	1.612	1.742	1.787	1.856	1.667	1.613	1.591	1.647	1.671	1.661	1.391	1.404	1.697	1.674	1.67	1.757	1.639	1.592	0.84	1.497	1.724	1.742	1.587	1.618	1.685	1.712	1.729
12:19:03	1.635	1.706	1.837	1.848	1.839	1.846	1.85	1.84	1.842	1.834	1.854	1.835	1.807	1.864	1.819	1.773	1.555	1.658	1.581	1.726	1.754	1.745	1.617	1.745	1.788	1.854	1.674	1.62	1.594	1.651	1.67	1.661	1.395	1.408	1.701	1.675	1.671	1.752	1.641	1.591	0.891	1.534	1.722	1.744	1.597	1.623	1.69	1.713	1.74
12:29:03	1.633	1.699	1.835	1.85	1.837	1.848	1.85	1.84	1.845	1.836	1.852	1.831	1.803	1.86	1.82	1.778	1.559	1.665	1.594	1.73	1.759	1.75	1.622	1.748	1.791	1.852	1.681	1.625	1.597	1.653	1.667	1.661	1.402	1.412	1.706	1.677	1.673	1.734	1.644	1.596	0.947	1.566	1.727	1.745	1.6	1.629	1.698	1.719	1.744
12:39:03	1.634	1.696	1.834	1.853	1.837	1.849	1.849	1.839	1.847	1.838	1.851	1.828	1.799	1.856	1.822	1.783	1.565	1.671	1.601	1.733	1.762	1.753	1.627	1.751	1.792	1.851	1.689	1.631	1.603	1.656	1.668	1.66	1.412	1.418	1.71	1.681	1.674	1.778	1.649	1.598	1.004	1.597	1.732	1.748	1.606	1.634	1.702	1.725	1.747
12:49:03	1.637	1.696	1.833	1.855	1.839	1.85	1.849	1.836	1.849	1.84	1.849	1.827	1.794	1.851	1.824	1.786	1.569	1.678	1.609	1.736	1.765	1.757	1.63	1.755	1.792	1.849	1.692	1.638	1.606	1.659	1.67	1.659	1.418	1.426	1.715	1.68	1.675	1.744	1.651	1.6	1.063	1.624	1.734	1.749	1.612	1.64	1.71	1.73	1.75
12:59:03	1.637	1.697	1.832	1.857	1.839	1.851	1.849	1.835	1.851	1.842	1.848	1.825	1.79	1.848	1.827	1.79	1.575	1.684	1.619	1.74	1.767	1.761	1.636	1.758	1.791	1.846	1.693	1.643	1.61	1.662	1.671	1.658	1.422	1.433	1.716	1.682	1.675	1.771	1.653	1.604	1.126	1.648	1.738	1.75	1.62	1.646	1.716	1.734	1.754
13:09:03	1.643	1.695	1.831	1.857	1.838	1.853	1.85	1.834	1.853	1.843	1.849	1.824	1.786	1.843	1.829	1.793	1.581	1.689	1.625	1.744	1.769	1.765	1.64	1.762	1.79	1.841	1.695	1.648	1.613	1.665	1.67	1.659	1.435	1.44	1.717	1.683	1.674	1.768	1.653	1.605	1.193	1.669	1.739	1.748	1.625	1.651	1.722	1.736	1.763
13:19:03	1.645	1.695	1.83	1.859	1.837	1.853	1.849	1.833	1.853	1.847	1.85	1.824	1.784	1.839	1.832	1.797	1.587	1.695	1.634	1.749	1.769	1.768	1.645	1.763	1.786	1.835	1.701	1.651	1.617	1.669	1.671	1.658	1.436	1.448	1.718	1.683	1.673	1.768	1.655	1.607	1.257	1.687	1.741	1.746	1.632	1.658	1.726	1.74	1.762
13:29:03	1.644	1.695	1.827	1.859	1.837	1.853	1.85	1.831	1.855	1.848	1.851	1.823	1.783	1.834	1.835	1.8	1.592	1.7	1.684	1.752	1.768	1.772	1.65	1.766	1.783	1.83	1.715	1.656	1.623	1.672	1.67	1.66	1.446	1.456	1.718	1.684	1.674	1.769	1.653	1.608	1.319	1.704	1.74	1.743	1.639	1.664	1.731	1.742	1.764
13:39:03	1.647	1.696	1.826	1.859	1.838	1.853	1.852	1.83	1.856	1.85	1.851	1.824	1.78	1.829	1.836	1.802	1.599	1.705	1.649	1.756	1.766	1.775	1.653	1.767	1.778	1.828	1.716	1.66	1.626	1.676	1.674	1.659	1.456	1.466	1.719	1.686	1.679	1.775	1.654	1.612	1.373	1.72	1.74	1.743	1.644	1.671	1.734	1.744	1.767
13:49:03	1.651	1.698	1.826	1.859	1.838	1.854	1.852	1.829	1.86	1.85	1.851	1.824	1.779	1.826	1.838	1.806	1.605	1.71	1.681	1.759	1.762	1.78	1.659	1.768	1.776	1.827	1.725	1.663	1.631	1.68	1.673	1.659	1.463	1.475	1.72	1.686	1.682	1.78	1.654	1.614	1.424	1.734	1.738	1.742	1.652	1.677	1.738	1.745	1.765
13:59:03	1.653	1.697	1.823	1.86	1.838	1.853	1.852	1.827	1.86	1.852	1.853	1.825	1.778	1.823	1.841	1.807	1.611	1.714	1.671	1.761	1.756	1.78	1.663	1.768	1.772	1.826	1.733	1.664	1.634	1.683	1.674	1.659	1.479	1.482	1.721	1.685	1.684	1.787	1.66	1.617	1.462	1.745	1.735	1.741	1.659	1.684	1.74	1.747	1.765
14:09:03	1.661	1.699	1.824	1.86	1.839	1.853	1.852	1.828	1.862	1.853	1.853	1.825	1.775	1.82	1.842	1.81	1.617	1.718	1.666	1.764	1.75	1.782	1.667	1.768	1.771	1.825	1.739	1.661	1.639	1.686	1.675	1.659	1.478	1.488	1.722	1.687	1.689	1.792	1.658	1.619	1.499	1.757	1.736	1.74	1.666	1.691	1.741	1.747	1.768
14:19:03	1.659	1.7	1.824	1.861	1.839	1.853	1.854	1.827	1.865	1.854	1.854	1.828	1.775	1.819	1.845	1.812	1.625	1.722	1.669	1.769	1.748	1.785	1.672	1.767	1.77	1.824	1.745	1.659	1.643	1.689	1.675	1.66	1.484	1.496	1.724	1.685	1.688	1.796	1.66	1.619	1.535	1.766	1.736	1.74	1.673	1.697	1.742	1.748	1.77
14:29:03	1.662	1.699	1.823	1.86	1.84	1.852	1.854	1.826	1.864	1.854	1.854	1.829	1.775	1.817	1.846	1.814	1.632	1.725	1.674	1.771	1.746	1.788	1.674	1.766	1.767	1.821	1.751	1.66	1.648	1.693	1.675	1.661	1.488	1.503	1.725	1.689	1.694	1.802	1.664	1.614	1.569	1.774	1.739	1.741	1.679	1.703	1.743	1.751	1.771
14:39:03	1.668	1.7	1.825	1.86	1.843	1.852	1.855	1.826	1.867	1.855	1.855	1.829	1.773	1.817	1.848	1.815	1.637	1.728	1.681	1.774	1.743	1.789	1.68	1.766	1.765	1.819	1.756	1.661	1.653	1.696	1.677	1.662	1.491	1.508	1.725	1.692	1.695	1.806	1.664	1.609	1.599	1.781	1.738	1.743	1.686	1.709	1.746	1.751	1.775
14:49:03	1.665	1.701	1.824	1.861	1.843	1.852	1.854	1.825	1.867	1.856	1.855	1.83	1.775	1.815	1.849	1.817	1.644	1.732	1.683	1.777	1.743	1.795	1.684	1.763	1.761	1.82	1.759	1.659	1.657	1.7	1.678	1.662	1.496	1.512	1.726	1.692	1.697	1.81	1.664	1.609	1.628	1.787	1.739	1.742	1.692	1.715	1.747	1.752	1.778
14:59:03	1.672	1.703	1.824	1.861	1.844	1.851	1.855	1.826	1.869	1.857	1.857	1.833	1.779	1.815	1.85	1.818	1.648	1.734	1.688	1.781	1.744	1.791	1.688	1.762	1.759	1.819	1.763	1.661	1.661	1.702	1.679	1.664	1.503	1.519	1.727	1.693	1.698	1.815	1.667	1.608	1.651	1.791	1.74	1.744	1.699	1.721	1.749	1.754	1.779
15:09:03	1.672	1.704	1.824	1.86	1.844	1.851	1.856	1.825	1.869	1.857	1.855	1.834	1.775	1.814	1.853	1.82	1.654	1.737	1.692	1.782	1.744	1.79	1.692	1.762	1.757	1.816	1.765	1.665	1.665	1.706	1.679	1.663	1.509	1.526	1.728	1.693	1.698	1.818	1.666	1.607	1.671	1.796	1.74	1.744	1.704	1.727	1.752	1.754	1.781
15:19:03	1.678	1.704	1.824	1.861	1.843	1.851	1.859	1.826	1.868	1.857	1.855	1.833	1.776	1.813	1.852	1.82	1.661	1.74	1.697	1.782	1.743	1.793	1.697	1.76	1.752	1.817	1.767	1.669	1.669	1.709	1.68	1.664	1.52	1.533	1.728	1.696	1.703	1.822	1.669	1.606	1.69	1.799	1.743	1.744	1.709	1.731	1.755	1.754	1.782
15:29:03	1.681	1.704	1.823	1.86	1.842	1.85	1.859	1.826	1.869	1.857	1.855	1.833	1.782	1.813	1.854	1.822	1.666	1.742	1.702	1.785	1.745	1.783	1.701	1.759	1.748	1.816	1.77	1.673	1.673	1.713	1.68	1.667	1.526	1.538	1.732	1.696	1.708	1.825	1.669	1.607	1.706	1.8	1.742	1.746	1.716	1.735	1.756	1.755	1.785
15:39:03	1.68	1.705	1.825	1.86	1.842	1.849	1.86	1.827	1.868	1.857	1.855	1.834	1.78	1.812	1.853	1.823	1.673	1.745	1.706	1.785	1.744	1.776	1.706	1.758	1.741	1.814	1.773	1.677	1.675	1.716	1.682	1.668	1.528	1.542	1.736	1.699	1.708	1.826	1.669	1.607	1.722	1.802	1.744	1.745	1.719	1.738	1.759	1.755	1.788
15:49:03	1.687	1.707	1.825	1.861	1.843	1.85	1.861	1.828	1.87	1.857	1.853	1.834	1.784	1.813	1.854	1.825	1.679	1.748	1.711	1.789	1.746	1.771	1.711	1.759	1.738	1.815	1.776	1.678	1.68	1.72	1.683	1.669	1.532	1.547	1.738	1.699	1.71	1.828	1.673	1.609	1.736	1.804	1.745	1.747	1.724	1.744	1.759	1.755	1.788
15:59:03	1.691	1.709	1.825	1.861	1.841	1.849	1.861	1.828	1.87	1.857	1.852	1.836	1.785	1.812	1.854	1.823	1.686	1.75	1.716	1.788	1.748	1.764	1.716	1.758	1.737	1.815	1.778	1.683	1.682	1.723	1.684	1.668	1.536	1.551	1.738	1.7	1.711	1.832	1.674	1.611	1.747	1.804	1.745	1.747	1.729	1.746	1.761	1.756	1.79
16:09:03	1.692	1.708	1.827	1.862	1.841	1.85	1.862	1.829	1.87	1.858	1.849	1.837	1.785	1.812	1.853	1.822	1.69	1.752	1.72	1.791	1.752	1.763	1.722	1.758	1.732	1.816	1.783	1.688	1.686	1.727	1.684	1.67	1.542	1.555	1.738	1.7	1.711	1.836	1.674	1.614	1.759	1.804	1.745	1.748	1.733	1.749	1.763	1.756	1.792
16:19:03	1.69	1.709	1.826	1.861	1.841	1.849	1.861	1.829	1.869	1.858	1.848	1.84	1.781	1.812	1.853	1.825	1.695	1.756	1.725	1.791	1.753	1.761	1.726	1.756	1.73	1.815	1.785	1.69	1.691	1.73	1.685	1.671	1.546	1.557	1.737	1.699	1.71	1.838	1.675	1.616	1.767	1.804	1.746	1.749	1.735	1.754	1.764	1.756	1.794
16:29:03	1.698	1.709	1.826	1.861	1.839	1.85	1.862	1.829	1.869	1.856	1.847	1.839	1.788	1.81	1.853	1.828	1.699	1.757	1.73	1.793	1.755	1.76	1.731	1.756	1.729	1.814	1.788	1.694	1.694	1.734	1.686	1.674	1.55	1.561	1.734	1.703	1.71	1.84	1.676	1.618	1.775	1.802	1.748	1.751	1.74	1.756	1.767	1.755	1.795
16:39:03	1.697	1.709	1.826	1.862	1.84	1.85	1.861	1.83	1.869	1.855	1.846	1.835	1.787	1.812	1.853	1.825	1.704	1.76	1.734	1.796	1.758	1.758	1.735	1.756	1.728	1.815	1.79	1.7	1.698	1.739	1.685	1.676	1.553	1.566	1.736	1.699	1.712	1.843	1.677	1.62	1.781	1.802	1.747	1.751	1.742	1.758	1.769	1.753	1.797
16:49:03	1.704	1.71	1.828	1.862	1.841	1.85	1.861	1.831	1.869	1.855	1.845	1.833	1.784	1.81	1.853	1.826	1.708	1.763	1.738	1.797	1.76	1.757	1.738	1.756	1.728	1.815	1.794	1.704	1.703	1.742	1.686	1.677	1.559	1.569	1.737	1.696	1.713	1.845	1.678	1.62	1.788	1.799	1.749	1.751	1.746	1.76	1.771	1.753	1.796
16:59:03	1.71	1.712	1.828	1.862	1.84	1.85	1.86	1.83	1.869	1.854	1.844	1.835	1.784	1.81	1.853	1.825	1.712	1.765	1.741	1.797	1.76	1.758	1.741	1.757	1.728	1.816	1.795	1.704	1.706	1.746	1.685	1.678	1.563	1.574	1.736	1.698	1.715	1.847	1.68	1.621	1.793	1.8	1.748	1.752	1.748	1.762	1.769	1.753	1.798
17:09:03	1.709	1.712	1.828	1.863	1.841	1.849	1.862	1.832	1.871	1.855	1.843	1.835	1.784	1.81	1.851	1.826	1.716	1.767	1.745	1.798	1.762	1.759	1.744	1.756	1.729	1.816	1.798	1.713	1.711	1.749	1.687	1.679	1.568	1.577	1.734	1.701	1.715	1.847	1.681	1.622	1.798	1.8	1.75	1.754	1.752	1.763	1.77	1.752	1.798
17:19:03	1.709	1.712	1.829	1.863	1.841	1.85	1.861	1.831	1.871	1.856	1.841	1.833	1.784	1.81	1.851	1.825	1.718	1.768	1.748	1.8	1.764	1.757	1.746	1.757	1.73	1.816	1.8	1.71	1.715	1.753	1.685	1.68	1.573	1.583	1.736	1.701	1.716	1.847	1.68	1.621	1.801	1.799	1.752	1.755	1.755	1.764	1.771	1.752	1.798
17:29:03	1.711	1.714	1.83	1.863	1.842	1.849	1.862	1.831	1.87	1.856	1.841	1.838	1.784	1.81	1.851	1.821	1.722	1.77	1.753	1.801	1.765	1.757	1.748	1.757	1.731	1.817	1.803	1.718	1.719	1.757	1.685	1.682	1.578	1.588	1.735	1.7	1.718	1.847	1.68	1.622	1.802	1.8	1.754	1.755	1.757	1.763	1.772	1.753	1.797
17:39:03	1.713	1.715	1.829	1.864	1.841	1.85	1.861	1.833	1.871	1.857	1.84	1.836	1.784	1.812	1.85	1.824	1.726	1.772	1.755	1.802	1.766	1.758	1.751	1.758	1.733	1.817	1.805	1.717	1.723	1.76	1.686	1.683	1.582	1.593	1.735	1.703	1.72	1.848	1.681	1.622	1.802	1.801	1.754	1.757	1.758	1.763	1.773	1.753	1.799
17:49:03	1.718	1.716	1.83	1.863	1.84	1.851	1.863	1.831	1.87	1.857	1.839	1.834	1.784	1.81	1.849	1.824	1.729	1.771	1.757	1.802	1.767	1.758	1.753	1.757	1.733	1.815	1.807	1.722	1.728	1.763	1.685	1.682	1.583	1.598	1.735	1.702	1.722	1.849	1.683	1.622	1.803	1.8	1.754	1.759	1.76	1.765	1.773	1.753	1.796
17:59:03	1.72	1.718	1.831	1.863	1.841	1.852	1.863	1.833	1.872	1.857	1.839	1.831	1.783	1.81	1.848	1.825	1.732	1.773	1.759	1.803	1.768	1.759	1.754	1.759	1.735	1.817	1.808	1.72	1.731	1.765	1.686	1.682	1.584	1.602	1.735	1.7	1.723	1.848	1.684	1.629	1.803	1.8	1.755	1.759	1.761	1.763	1.773	1.754	1.797
18:09:03	1.722	1.719	1.832	1.865	1.841	1.851	1.864	1.834	1.872	1.856	1.839	1.831	1.784	1.812	1.845	1.822	1.734	1.773	1.761	1.805	1.769	1.759	1.753	1.758	1.735	1.817	1.811	1.724	1.735	1.767	1.685	1.683	1.589	1.604	1.734	1.702	1.724	1.848	1.686	1.632	1.802	1.8	1.756	1.76	1.763	1.763	1.773	1.753	1.799
18:19:03	1.719	1.72	1.833	1.865	1.841	1.851	1.864	1.836	1.871	1.855	1.837	1.831	1.784	1.811	1.845	1.823	1.738	1.774	1.761	1.804	1.768	1.757	1.754	1.758	1.736	1.815	1.813	1.723	1.739	1.77	1.686	1.686	1.595	1.607	1.733	1.703	1.728	1.847	1.686	1.632	1.801	1.801	1.757	1.761	1.764	1.763	1.772	1.753	1.797
18:29:03	1.723	1.72	1.833	1.866	1.842	1.853	1.866	1.837	1.873	1.856	1.837	1.831	1.787	1.813	1.843	1.82	1.741	1.774	1.763	1.806	1.768	1.759	1.755	1.758	1.738	1.817	1.816	1.725	1.742	1.772	1.688	1.689	1.598	1.612	1.734	1.702	1.731	1.848	1.687	1.631	1.8	1.8	1.757	1.762	1.766	1.761	1.775	1.753	1.797
18:39:03	1.721	1.721	1.835	1.865	1.84	1.853	1.866	1.837	1.872	1.855	1.837	1.828	1.787	1.815	1.842	1.819	1.743	1.775	1.766	1.807	1.771	1.76	1.756	1.759	1.738	1.814	1.816	1.728	1.744	1.773	1.687	1.687	1.599	1.616	1.735	1.699	1.733	1.848	1.687	1.631	1.8	1.8	1.759	1.764	1.766	1.76	1.775	1.753	1.798
18:49:03	1.726	1.724	1.837	1.865	1.842	1.855	1.868	1.838	1.873	1.856	1.837	1.826	1.789	1.816	1.843	1.819	1.744	1.775	1.767	1.805	1.77	1.76	1.756	1.759	1.738	1.816	1.819	1.729	1.747	1.775	1.688	1.69	1.6	1.619	1.733	1.7	1.736	1.848	1.688	1.631	1.8	1.8	1.761	1.763	1.769	1.759	1.774	1.752	1.798
18:59:03	1.73	1.725	1.838	1.866	1.843	1.856	1.87	1.838	1.874	1.855	1.836	1.832	1.789	1.817	1.841	1.818	1.747	1.775	1.765	1.806	1.769	1.761	1.755	1.76	1.739	1.814	1.821	1.731	1.749	1.776	1.688	1.693	1.603	1.621	1.731	1.701	1.736	1.847	1.688	1.63	1.8	1.8	1.759	1.764	1.769	1.758	1.774	1.751	1.797
19:09:03	1.733	1.725	1.839	1.867	1.844	1.857	1.871	1.839	1.874	1.855	1.836	1.833	1.788	1.819	1.839	1.818	1.749	1.775	1.768	1.808	1.772	1.763	1.754	1.76	1.74	1.816	1.822	1.738	1.751	1.776	1.69	1.698	1.605	1.625	1.73	1.7	1.739	1.848	1.688	1.629	1.8	1.8	1.761	1.766	1.77	1.756	1.772	1.75	1.798
19:19:03	1.724	1.726	1.84	1.866	1.842	1.858	1.872	1.84	1.872	1.856	1.835	1.832	1.784	1.822	1.837	1.814	1.752	1.774	1.769	1.807	1.773	1.762	1.755	1.76	1.74	1.816	1.823	1.736	1.752	1.777	1.691	1.701	1.608	1.627	1.729	1.699	1.739	1.847	1.689	1.629	1.799	1.798	1.761	1.765	1.77	1.755	1.774	1.749	1.799
19:29:03	1.737	1.727	1.842	1.867	1.843	1.861	1.872	1.841	1.873	1.855	1.834	1.828	1.785	1.824	1.837	1.816	1.754	1.774	1.772	1.809	1.772	1.763	1.754	1.759	1.74	1.815	1.824	1.736	1.754	1.779	1.692	1.697	1.611	1.629	1.728	1.7	1.741	1.848	1.69	1.629	1.798	1.797	1.761	1.766	1.771	1.753	1.775	1.747	1.799
19:39:03	1.727	1.728	1.843	1.869	1.844	1.862	1.875	1.842	1.873	1.852	1.834	1.827	1.786	1.826	1.835	1.816	1.755	1.774	1.773	1.807	1.77	1.762	1.753	1.76	1.74	1.819	1.827	1.74	1.754	1.779	1.693	1.699	1.613	1.632	1.727	1.699	1.742	1.847	1.692	1.629	1.796	1.795	1.763	1.764	1.771	1.753	1.776	1.746	1.801
19:49:03	1.737	1.729	1.844	1.867	1.841	1.863	1.877	1.843	1.874	1.856	1.834	1.828	1.787	1.828	1.835	1.818	1.756	1.773	1.772	1.808	1.772	1.764	1.752	1.761	1.741	1.82	1.828	1.742	1.755	1.78	1.692	1.698	1.615	1.633	1.727	1.7	1.744	1.844	1.692	1.63	1.795	1.795	1.761	1.764	1.772	1.752	1.777	1.745	1.798
19:59:03	1.737	1.729	1.842	1.868	1.844	1.864	1.878	1.843	1.869	1.854	1.835	1.825	1.785	1.834	1.835	1.812	1.758	1.773	1.773	1.806	1.771	1.763	1.751	1.762	1.741	1.821	1.829	1.744	1.756	1.779	1.694	1.698	1.615	1.635	1.728	1.7	1.746	1.841	1.693	1.631	1.791	1.793	1.762	1.764	1.771	1.752	1.775	1.743	1.798
20:09:03	1.735	1.73	1.84	1.869	1.841	1.865	1.879	1.843	1.872	1.853	1.834	1.831	1.787	1.833	1.836	1.812	1.759	1.771	1.777	1.804	1.772	1.763	1.75	1.762	1.741	1.824	1.832	1.742	1.755	1.78	1.696	1.701	1.616	1.638	1.726	1.697	1.747	1.839	1.694	1.63	1.791	1.792	1.763	1.764	1.771	1.751	1.774	1.742	1.797
20:19:03	1.738	1.732	1.835	1.869	1.841	1.865	1.881	1.845	1.871	1.858	1.835	1.83	1.789	1.835	1.835	1.813	1.761	1.772	1.778	1.805	1.771	1.764	1.749	1.765	1.742	1.825	1.834	1.746	1.757	1.781	1.697	1.706	1.62	1.64	1.727	1.7	1.75	1.838	1.696	1.631	1.789	1.791	1.763	1.763	1.774	1.752	1.775	1.741	1.799
20:29:03	1.747	1.732	1.831	1.869	1.848	1.867	1.882	1.846	1.878	1.858	1.836	1.831	1.789	1.831	1.835	1.813	1.762	1.77	1.78	1.807	1.769	1.765	1.749	1.765	1.743	1.827	1.837	1.747	1.755	1.779	1.699	1.706	1.62	1.641	1.726	1.702	1.752	1.837	1.698	1.633	1.789	1.789	1.763	1.763	1.772	1.752	1.774	1.74	1.798
20:39:03	1.754	1.735	1.825	1.87	1.847	1.867	1.885	1.847	1.878	1.855	1.836	1.833	1.789	1.832	1.835	1.811	1.762	1.768	1.78	1.803	1.769	1.765	1.748	1.767	1.743	1.828	1.838	1.751	1.756	1.778	1.7	1.702	1.622	1.642	1.727	1.701	1.752	1.835	1.7	1.633	1.786	1.787	1.763	1.764	1.772	1.75	1.771	1.738	1.797
20:49:03	1.753	1.737	1.823	1.871	1.849	1.87	1.887	1.848	1.87	1.858	1.837	1.835	1.791	1.836	1.834	1.81	1.764	1.766	1.776	1.805	1.77	1.766	1.747	1.768	1.743	1.834	1.839	1.751	1.756	1.776	1.7	1.703	1.626	1.643	1.726	1.703	1.754	1.833	1.701	1.634	1.784	1.786	1.765	1.765	1.773	1.75	1.77	1.738	1.8
20:59:03	1.75	1.739	1.824	1.871	1.849	1.87	1.889	1.85	1.874	1.857	1.838	1.834	1.79	1.838	1.833	1.813	1.765	1.765	1.777	1.805	1.767	1.765	1.747	1.769	1.743	1.835	1.842	1.753	1.756	1.776	1.702	1.704	1.627	1.642	1.725	1.703	1.756	1.831	1.703	1.635	1.783	1.784	1.767	1.767	1.773	1.75	1.77	1.738	1.799
21:09:03	1.747	1.74	1.821	1.872	1.854	1.871	1.889	1.851	1.877	1.857	1.837	1.839	1.79	1.84	1.831	1.812	1.765	1.762	1.778	1.803	1.767	1.766	1.747	1.769	1.744	1.835	1.844	1.754	1.756	1.775	1.707	1.705	1.626	1.644	1.724	1.704	1.757	1.829	1.705	1.636	1.78	1.782	1.768	1.769	1.773	1.75	1.768	1.736	1.796
21:19:03	1.745	1.742	1.821	1.872	1.854	1.874	1.891	1.852	1.872	1.86	1.838	1.835	1.792	1.842	1.83	1.813	1.766	1.76	1.777	1.804	1.766	1.767	1.745	1.771	1.744	1.838	1.845	1.756	1.756	1.774	1.707	1.704	1.627	1.646	1.724	1.703	1.757	1.825	1.706	1.638	1.777	1.78	1.767	1.772	1.772	1.749	1.766	1.735	1.798
21:29:03	1.757	1.744	1.819	1.873	1.855	1.875	1.892	1.853	1.877	1.86	1.839	1.839	1.797	1.846	1.829	1.81	1.767	1.759	1.78	1.802	1.765	1.767	1.746	1.773	1.744	1.841	1.847	1.758	1.753	1.774	1.705	1.706	1.628	1.644	1.724	1.703	1.759	1.825	1.708	1.639	1.777	1.777	1.769	1.774	1.772	1.75	1.767	1.738	1.798
21:39:03	1.76	1.745	1.824	1.873	1.862	1.876	1.893	1.855	1.875	1.862	1.838	1.836	1.797	1.848	1.829	1.806	1.767	1.754	1.784	1.8	1.766	1.767	1.745	1.773	1.744	1.839	1.85	1.76	1.754	1.773	1.706	1.706	1.627	1.643	1.724	1.706	1.759	1.822	1.71	1.64	1.777	1.774	1.771	1.774	1.771	1.749	1.766	1.738	1.799
21:49:03	1.764	1.745	1.821	1.873	1.859	1.877	1.894	1.856	1.869	1.861	1.837	1.836	1.796	1.846	1.826	1.807	1.767	1.752	1.784	1.802	1.763	1.766	1.744	1.773	1.745	1.839	1.85	1.763	1.753	1.772	1.705	1.703	1.626	1.644	1.724	1.706	1.76	1.82	1.711	1.64	1.774	1.769	1.77	1.776	1.772	1.748	1.766	1.736	1.8
21:59:03	1.763	1.747	1.825	1.872	1.861	1.879	1.893	1.857	1.866	1.863	1.836	1.838	1.799	1.849	1.827	1.804	1.767	1.751	1.783	1.804	1.763	1.764	1.744	1.774	1.744	1.842	1.846	1.764	1.752	1.771	1.702	1.702	1.628	1.647	1.726	1.708	1.76	1.817	1.713	1.642	1.771	1.765	1.771	1.776	1.771	1.747	1.766	1.738	1.799
22:09:03	1.77	1.749	1.831	1.873	1.861	1.882	1.894	1.862	1.869	1.864	1.839	1.841	1.802	1.85	1.826	1.808	1.765	1.748	1.783	1.805	1.76	1.764	1.743	1.775	1.745	1.837	1.848	1.767	1.75	1.771	1.7	1.704	1.627	1.649	1.726	1.708	1.762	1.818	1.715	1.644	1.77	1.76	1.774	1.78	1.769	1.747	1.765	1.741	1.8
22:19:03	1.771	1.748	1.838	1.872	1.864	1.882	1.9	1.864	1.87	1.866	1.84	1.837	1.804	1.852	1.827	1.806	1.766	1.749	1.785	1.804	1.762	1.765	1.744	1.775	1.746	1.842	1.85	1.769	1.752	1.77	1.703	1.705	1.627	1.65	1.726	1.708	1.763	1.816	1.717	1.645	1.767	1.753	1.775	1.782	1.769	1.745	1.765	1.743	1.801
22:29:03	1.77	1.751	1.84	1.871	1.863	1.883	1.901	1.868	1.873	1.865	1.841	1.835	1.8	1.855	1.826	1.804	1.766	1.753	1.785	1.805	1.763	1.763	1.744	1.777	1.748	1.849	1.855	1.769	1.753	1.769	1.701	1.705	1.626	1.65	1.727	1.71	1.764	1.815	1.718	1.648	1.765	1.748	1.776	1.783	1.769	1.744	1.765	1.746	1.802
22:39:03	1.769	1.751	1.844	1.872	1.867	1.887	1.902	1.869	1.875	1.867	1.841	1.837	1.804	1.859	1.826	1.804	1.766	1.758	1.786	1.802	1.759	1.764	1.744	1.778	1.749	1.854	1.857	1.77	1.752	1.768	1.699	1.706	1.627	1.652	1.728	1.708	1.766	1.815	1.72	1.65	1.765	1.743	1.778	1.784	1.768	1.742	1.766	1.743	1.803
22:49:03	1.767	1.754	1.844	1.871	1.866	1.89	1.904	1.87	1.876	1.868	1.842	1.837	1.805	1.854	1.825	1.803	1.764	1.752	1.786	1.803	1.762	1.765	1.743	1.778	1.749	1.852	1.859	1.771	1.751	1.767	1.698	1.704	1.633	1.652	1.729	1.713	1.767	1.813	1.722	1.651	1.763	1.739	1.778	1.785	1.767	1.74	1.766	1.74	1.807
22:59:03	1.771	1.752	1.846	1.872	1.864	1.894	1.902	1.871	1.878	1.867	1.841	1.843	1.806	1.856	1.826	1.804	1.763	1.754	1.784	1.802	1.761	1.763	1.744	1.78	1.751	1.85	1.862	1.771	1.75	1.767	1.698	1.706	1.632	1.652	1.73	1.713	1.769	1.812	1.725	1.653	1.762	1.736	1.779	1.787	1.769	1.739	1.765	1.741	1.803
23:09:03	1.769	1.755	1.855	1.872	1.866	1.897	1.908	1.872	1.876	1.869	1.843	1.841	1.807	1.859	1.828	1.803	1.763	1.752	1.783	1.803	1.758	1.762	1.743	1.781	1.753	1.848	1.862	1.775	1.749	1.765	1.697	1.706	1.635	1.651	1.733	1.71	1.77	1.813	1.727	1.657	1.76	1.734	1.779	1.788	1.766	1.738	1.764	1.74	1.805
23:19:03	1.774	1.755	1.855	1.871	1.868	1.892	1.912	1.871	1.878	1.871	1.842	1.843	1.809	1.859	1.83	1.801	1.763	1.753	1.783	1.803	1.758	1.76	1.743	1.782	1.754	1.849	1.864	1.78	1.747	1.765	1.696	1.705	1.634	1.651	1.732	1.71	1.77	1.813	1.729	1.658	1.758	1.731	1.782	1.789	1.763	1.735	1.764	1.74	1.802
23:29:03	1.781	1.758	1.856	1.872	1.863	1.891	1.914	1.871	1.875	1.872	1.843	1.841	1.813	1.857	1.831	1.801	1.764	1.754	1.784	1.802	1.758	1.762	1.745	1.783	1.755	1.848	1.863	1.783	1.746	1.764	1.696	1.706	1.632	1.65	1.734	1.716	1.774	1.813	1.731	1.661	1.757	1.73	1.781	1.792	1.763	1.736	1.765	1.742	1.807
23:39:03	1.785	1.758	1.854	1.873	1.869	1.892	1.913	1.873	1.878	1.874	1.844	1.843	1.814	1.863	1.832	1.802	1.764	1.752	1.784	1.803	1.76	1.76	1.747	1.786	1.758	1.847	1.861	1.786	1.746	1.764	1.696	1.706	1.631	1.652	1.736	1.717	1.774	1.813	1.732	1.663	1.754	1.729	1.784	1.792	1.763	1.734	1.766	1.746	1.809
23:49:03	1.787	1.761	1.849	1.874	1.871	1.892	1.914	1.875	1.881	1.872	1.845	1.846	1.817	1.865	1.833	1.802	1.766	1.75	1.785	1.803	1.759	1.762	1.749	1.787	1.759	1.85	1.865	1.786	1.747	1.763	1.696	1.704	1.63	1.655	1.738	1.722	1.777	1.814	1.734	1.665	1.75	1.728	1.786	1.795	1.761	1.733	1.768	1.747	1.81
23:59:03	1.797	1.762	1.848	1.874	1.869	1.894	1.913	1.881	1.879	1.873	1.846	1.846	1.818	1.867	1.835	1.804	1.763	1.75	1.783	1.802	1.758	1.761	1.748	1.788	1.76	1.85	1.868	1.792	1.743	1.763	1.694	1.704	1.629	1.657	1.739	1.724	1.781	1.814	1.735	1.667	1.749	1.726	1.787	1.795	1.763	1.732	1.767	1.747	1.809
1 day, 0:09:03	1.788	1.761	1.854	1.875	1.87	1.896	1.914	1.879	1.878	1.875	1.848	1.847	1.816	1.862	1.836	1.803	1.762	1.747	1.782	1.802	1.76	1.763	1.749	1.79	1.761	1.847	1.867	1.792	1.74	1.762	1.694	1.703	1.633	1.655	1.741	1.731	1.783	1.816	1.739	1.67	1.747	1.726	1.787	1.796	1.763	1.732	1.767	1.745	1.808
[truncated: 35 more columns]

## Sheet: NRS384-va6
Time	NRS384	NRS384-2	NRS384-6.1	NRS384-6.1-2	NRS384-6.2	NRS384-6.2-2	NRS384-6.3	NRS384-6.3-2	NRS384-6.4	NRS384-6.4-2	NRS384-6.5	NRS384-6.5-2	NRS384-6.6	NRS384-6.6-2	NRS384-6.7	NRS384-6.7-2	NRS384-6.8	NRS384-6.8-2	NRS384-6.9	NRS384-6.9-2	NRS384-6.10	NRS384-6.10-2	NRS384-6.11	NRS384-6.11-2	NRS384-6.12	NRS384-6.12-2	NRS384-6.13	NRS384-6.13-2	NRS384-6.14	NRS384-6.14-2	NRS384-6.15	NRS384-6.15-2	NRS384-6.16	NRS384-6.16-2	NRS384-6.17	NRS384-6.17-2	NRS384-6.18	NRS384-6.18-2	NRS384-6.19	NRS384-6.19-2	NRS384-6.20	NRS384-6.20-2	NRS384-6.21	NRS384-6.21-2	NRS384-6.22	NRS384-6.22-2	NRS384-6.23	NRS384-6.23-2	NRS384-6.24
00:00:00	0.099	0.135	0.1	0.095	0.09	0.092	0.096	0.097	0.094	0.094	0.101	0.117	0.109	0.14	0.096	0.093	0.093	0.096	0.094	0.091	0.098	0.093	0.1	0.102	0.092	0.099	0.093	0.092	0.093	0.091	0.094	0.09	0.092	0.096	0.093	0.095	0.123	0.123	0.09	0.106	0.107	0.113	0.1	0.1	0.092	0.092	0.098	0.094	0.096
00:09:03	0.115	0.15	0.105	0.108	0.09	0.092	0.104	0.102	0.108	0.098	0.118	0.158	0.208	0.256	0.104	0.101	0.101	0.103	0.11	0.104	0.106	0.101	0.128	0.123	0.097	0.099	0.103	0.104	0.101	0.097	0.097	0.095	0.102	0.103	0.097	0.099	0.152	0.143	0.105	0.138	0.132	0.132	0.11	0.108	0.095	0.097	0.109	0.101	0.118
00:19:03	0.122	0.156	0.109	0.112	0.09	0.092	0.108	0.104	0.116	0.098	0.12	0.184	0.277	0.314	0.106	0.103	0.103	0.107	0.115	0.106	0.108	0.101	0.144	0.14	0.099	0.101	0.105	0.105	0.102	0.098	0.098	0.096	0.103	0.105	0.098	0.101	0.16	0.163	0.108	0.158	0.143	0.138	0.114	0.111	0.096	0.098	0.113	0.103	0.124
00:29:03	0.139	0.171	0.116	0.116	0.09	0.092	0.112	0.107	0.127	0.1	0.122	0.209	0.308	0.37	0.109	0.106	0.106	0.111	0.121	0.109	0.112	0.102	0.163	0.162	0.101	0.103	0.108	0.106	0.103	0.099	0.098	0.096	0.106	0.107	0.099	0.102	0.163	0.186	0.114	0.146	0.158	0.147	0.12	0.114	0.097	0.099	0.118	0.107	0.128
00:39:03	0.155	0.202	0.123	0.121	0.09	0.092	0.118	0.111	0.141	0.101	0.125	0.23	0.302	0.41	0.113	0.109	0.108	0.116	0.13	0.112	0.116	0.105	0.183	0.184	0.104	0.107	0.112	0.107	0.104	0.1	0.099	0.097	0.11	0.111	0.1	0.104	0.166	0.206	0.122	0.143	0.177	0.158	0.127	0.119	0.098	0.101	0.124	0.11	0.132
00:49:03	0.175	0.254	0.134	0.128	0.09	0.093	0.124	0.117	0.157	0.103	0.13	0.25	0.295	0.389	0.118	0.114	0.112	0.122	0.142	0.116	0.123	0.108	0.202	0.204	0.108	0.111	0.116	0.108	0.105	0.101	0.1	0.098	0.117	0.116	0.102	0.106	0.169	0.223	0.131	0.151	0.196	0.169	0.137	0.125	0.1	0.104	0.132	0.116	0.139
00:59:03	0.2	0.315	0.145	0.137	0.09	0.093	0.132	0.124	0.174	0.105	0.134	0.271	0.327	0.431	0.126	0.119	0.117	0.13	0.154	0.12	0.131	0.112	0.218	0.22	0.112	0.116	0.121	0.109	0.106	0.102	0.1	0.099	0.125	0.122	0.104	0.11	0.173	0.238	0.142	0.173	0.216	0.181	0.147	0.133	0.101	0.106	0.141	0.122	0.146
01:09:03	0.233	0.367	0.162	0.15	0.091	0.093	0.143	0.133	0.194	0.107	0.14	0.292	0.356	0.476	0.135	0.127	0.123	0.138	0.169	0.125	0.141	0.117	0.235	0.236	0.117	0.121	0.127	0.11	0.108	0.103	0.101	0.101	0.134	0.131	0.107	0.114	0.179	0.251	0.156	0.197	0.236	0.193	0.159	0.142	0.104	0.111	0.154	0.131	0.156
01:19:03	0.273	0.411	0.181	0.166	0.091	0.093	0.157	0.144	0.218	0.109	0.147	0.317	0.388	0.519	0.148	0.136	0.13	0.147	0.186	0.131	0.153	0.124	0.252	0.253	0.123	0.127	0.135	0.11	0.11	0.105	0.102	0.102	0.145	0.141	0.11	0.121	0.187	0.266	0.172	0.222	0.257	0.206	0.173	0.152	0.107	0.115	0.169	0.142	0.169
01:29:03	0.321	0.445	0.207	0.187	0.091	0.093	0.174	0.16	0.246	0.113	0.156	0.344	0.431	0.559	0.165	0.149	0.139	0.159	0.206	0.139	0.168	0.133	0.271	0.269	0.129	0.134	0.144	0.112	0.112	0.107	0.103	0.104	0.158	0.153	0.115	0.128	0.197	0.284	0.192	0.249	0.278	0.221	0.188	0.164	0.111	0.119	0.187	0.156	0.186
01:39:03	0.373	0.47	0.235	0.213	0.091	0.093	0.196	0.179	0.276	0.117	0.166	0.373	0.473	0.599	0.187	0.165	0.149	0.172	0.231	0.149	0.187	0.144	0.293	0.286	0.138	0.142	0.155	0.115	0.115	0.109	0.105	0.106	0.174	0.166	0.121	0.138	0.21	0.304	0.214	0.277	0.302	0.237	0.205	0.177	0.115	0.125	0.208	0.173	0.205
01:49:03	0.432	0.491	0.269	0.243	0.092	0.094	0.222	0.202	0.307	0.122	0.18	0.405	0.52	0.636	0.213	0.184	0.162	0.189	0.258	0.161	0.207	0.156	0.318	0.305	0.147	0.152	0.168	0.118	0.118	0.112	0.107	0.109	0.192	0.181	0.129	0.149	0.226	0.328	0.239	0.307	0.328	0.256	0.221	0.192	0.12	0.132	0.231	0.193	0.227
01:59:03	0.489	0.522	0.306	0.279	0.092	0.094	0.252	0.229	0.34	0.128	0.195	0.438	0.563	0.681	0.245	0.206	0.178	0.208	0.288	0.175	0.229	0.172	0.343	0.329	0.157	0.164	0.183	0.122	0.121	0.115	0.109	0.112	0.211	0.199	0.138	0.161	0.245	0.354	0.271	0.344	0.355	0.275	0.239	0.208	0.126	0.14	0.256	0.216	0.249
02:09:03	0.515	0.565	0.35	0.32	0.092	0.095	0.284	0.261	0.376	0.135	0.213	0.474	0.621	0.735	0.279	0.232	0.197	0.229	0.318	0.192	0.252	0.189	0.367	0.355	0.17	0.177	0.2	0.127	0.125	0.118	0.111	0.115	0.233	0.22	0.149	0.176	0.266	0.387	0.308	0.387	0.384	0.296	0.257	0.225	0.134	0.149	0.283	0.24	0.272
02:19:03	0.552	0.62	0.402	0.366	0.093	0.095	0.323	0.297	0.415	0.145	0.232	0.513	0.679	0.783	0.32	0.26	0.218	0.253	0.348	0.21	0.274	0.206	0.393	0.377	0.184	0.192	0.217	0.133	0.129	0.122	0.113	0.119	0.258	0.242	0.162	0.193	0.288	0.42	0.352	0.438	0.415	0.318	0.278	0.244	0.142	0.159	0.316	0.269	0.297
02:29:03	0.645	0.677	0.462	0.42	0.094	0.096	0.365	0.339	0.459	0.156	0.253	0.557	0.729	0.831	0.366	0.29	0.241	0.28	0.38	0.231	0.298	0.225	0.421	0.403	0.201	0.209	0.235	0.141	0.133	0.126	0.116	0.123	0.285	0.267	0.176	0.211	0.313	0.457	0.406	0.497	0.447	0.345	0.299	0.264	0.152	0.17	0.353	0.301	0.323
02:39:03	0.749	0.743	0.521	0.482	0.095	0.096	0.413	0.384	0.507	0.168	0.275	0.603	0.764	0.875	0.416	0.323	0.269	0.31	0.411	0.254	0.325	0.246	0.451	0.428	0.219	0.228	0.253	0.149	0.139	0.13	0.12	0.128	0.316	0.295	0.192	0.23	0.341	0.492	0.469	0.555	0.481	0.372	0.324	0.286	0.162	0.181	0.396	0.338	0.348
02:49:03	0.858	0.819	0.587	0.545	0.097	0.097	0.466	0.436	0.558	0.183	0.299	0.654	0.777	0.882	0.468	0.358	0.299	0.344	0.445	0.277	0.353	0.268	0.485	0.457	0.238	0.25	0.274	0.159	0.144	0.135	0.123	0.133	0.35	0.326	0.209	0.251	0.369	0.534	0.54	0.617	0.516	0.403	0.347	0.309	0.174	0.194	0.444	0.38	0.375
02:59:03	0.956	0.906	0.659	0.621	0.098	0.099	0.523	0.495	0.609	0.198	0.326	0.709	0.778	0.879	0.519	0.394	0.333	0.381	0.48	0.3	0.384	0.291	0.521	0.487	0.259	0.273	0.294	0.171	0.152	0.141	0.128	0.14	0.39	0.36	0.227	0.273	0.402	0.576	0.617	0.69	0.555	0.436	0.369	0.333	0.187	0.207	0.496	0.427	0.405
03:09:03	1.043	0.998	0.735	0.701	0.101	0.101	0.577	0.552	0.668	0.214	0.354	0.766	0.801	0.89	0.579	0.43	0.371	0.422	0.518	0.326	0.418	0.316	0.559	0.521	0.283	0.299	0.315	0.184	0.159	0.148	0.133	0.147	0.432	0.399	0.246	0.295	0.435	0.62	0.698	0.765	0.594	0.473	0.393	0.354	0.2	0.222	0.549	0.477	0.438
03:19:03	1.119	1.092	0.814	0.786	0.104	0.103	0.628	0.608	0.734	0.23	0.386	0.831	0.831	0.902	0.635	0.474	0.413	0.467	0.56	0.352	0.455	0.343	0.607	0.56	0.308	0.327	0.339	0.199	0.169	0.156	0.139	0.156	0.482	0.44	0.267	0.32	0.472	0.665	0.783	0.84	0.637	0.512	0.408	0.373	0.216	0.236	0.611	0.529	0.474
03:29:03	1.187	1.181	0.89	0.87	0.107	0.106	0.681	0.66	0.805	0.245	0.421	0.898	0.867	0.924	0.699	0.512	0.461	0.518	0.606	0.38	0.493	0.373	0.657	0.603	0.336	0.356	0.364	0.216	0.181	0.165	0.146	0.166	0.537	0.488	0.291	0.346	0.511	0.713	0.862	0.915	0.683	0.554	0.423	0.393	0.233	0.251	0.677	0.589	0.515
03:39:03	1.248	1.257	0.966	0.953	0.112	0.109	0.739	0.718	0.877	0.259	0.46	0.969	0.913	0.966	0.764	0.56	0.512	0.573	0.656	0.41	0.536	0.404	0.713	0.65	0.365	0.39	0.392	0.233	0.193	0.176	0.155	0.177	0.599	0.539	0.315	0.376	0.555	0.761	0.941	0.993	0.73	0.599	0.438	0.406	0.25	0.267	0.748	0.656	0.56
03:49:03	1.301	1.318	1.036	1.033	0.119	0.114	0.809	0.788	0.947	0.272	0.506	1.037	0.961	1.015	0.832	0.614	0.57	0.633	0.714	0.444	0.585	0.441	0.769	0.703	0.399	0.427	0.421	0.252	0.207	0.189	0.165	0.19	0.667	0.599	0.342	0.41	0.605	0.812	1.028	1.077	0.779	0.645	0.458	0.426	0.269	0.283	0.817	0.723	0.605
03:59:03	1.342	1.364	1.099	1.107	0.126	0.119	0.881	0.859	1.016	0.287	0.551	1.11	1.014	1.065	0.901	0.676	0.631	0.692	0.779	0.484	0.641	0.481	0.827	0.757	0.437	0.468	0.453	0.273	0.223	0.202	0.176	0.203	0.75	0.662	0.371	0.451	0.663	0.864	1.115	1.161	0.828	0.697	0.485	0.448	0.289	0.299	0.881	0.792	0.658
04:09:03	1.377	1.411	1.158	1.177	0.135	0.126	0.953	0.931	1.079	0.305	0.606	1.179	1.069	1.122	0.967	0.743	0.697	0.762	0.848	0.526	0.697	0.521	0.884	0.811	0.479	0.513	0.488	0.293	0.239	0.217	0.188	0.216	0.844	0.737	0.408	0.497	0.729	0.924	1.198	1.233	0.884	0.749	0.527	0.48	0.309	0.317	0.94	0.856	0.718
04:19:03	1.405	1.451	1.212	1.241	0.146	0.134	1.023	1.003	1.135	0.321	0.666	1.248	1.137	1.187	1.027	0.814	0.773	0.837	0.917	0.578	0.761	0.566	0.946	0.866	0.523	0.563	0.524	0.315	0.257	0.232	0.202	0.231	0.951	0.819	0.451	0.546	0.8	0.993	1.271	1.295	0.939	0.805	0.578	0.513	0.33	0.337	0.998	0.918	0.779
04:29:03	1.428	1.484	1.263	1.298	0.158	0.144	1.085	1.067	1.187	0.344	0.73	1.315	1.197	1.255	1.082	0.88	0.855	0.913	0.982	0.634	0.826	0.615	1.003	0.924	0.571	0.616	0.564	0.339	0.275	0.247	0.216	0.247	1.058	0.907	0.497	0.599	0.882	1.065	1.333	1.349	0.995	0.864	0.614	0.546	0.354	0.356	1.053	0.977	0.838
04:39:03	1.448	1.513	1.307	1.347	0.172	0.155	1.146	1.127	1.234	0.364	0.803	1.377	1.266	1.33	1.133	0.948	0.942	0.99	1.047	0.699	0.888	0.666	1.061	0.978	0.626	0.673	0.605	0.364	0.295	0.264	0.231	0.262	1.161	0.996	0.546	0.66	0.969	1.138	1.383	1.39	1.049	0.919	0.649	0.581	0.381	0.38	1.102	1.032	0.898
04:49:03	1.464	1.535	1.346	1.388	0.186	0.168	1.199	1.181	1.278	0.401	0.887	1.434	1.337	1.411	1.174	1.009	1.027	1.065	1.111	0.762	0.946	0.719	1.117	1.035	0.685	0.735	0.648	0.39	0.316	0.281	0.246	0.278	1.249	1.081	0.597	0.722	1.054	1.216	1.418	1.419	1.102	0.977	0.686	0.616	0.411	0.405	1.146	1.081	0.954
04:59:03	1.479	1.553	1.383	1.427	0.203	0.181	1.246	1.23	1.316	0.437	0.976	1.484	1.409	1.485	1.21	1.068	1.106	1.138	1.175	0.827	1.002	0.774	1.174	1.087	0.757	0.813	0.691	0.419	0.338	0.3	0.261	0.294	1.325	1.162	0.654	0.786	1.139	1.29	1.446	1.443	1.152	1.03	0.721	0.65	0.443	0.436	1.185	1.129	1.009
05:09:03	1.492	1.568	1.42	1.464	0.218	0.196	1.288	1.272	1.351	0.476	1.068	1.531	1.474	1.548	1.245	1.12	1.177	1.207	1.235	0.896	1.055	0.83	1.226	1.142	0.84	0.908	0.734	0.448	0.362	0.321	0.277	0.311	1.39	1.237	0.714	0.848	1.22	1.364	1.471	1.464	1.2	1.082	0.755	0.683	0.476	0.468	1.224	1.173	1.062
05:19:03	1.508	1.58	1.453	1.495	0.233	0.208	1.325	1.31	1.382	0.526	1.16	1.573	1.526	1.596	1.276	1.162	1.251	1.27	1.292	0.964	1.103	0.884	1.273	1.195	0.929	1.004	0.781	0.479	0.388	0.343	0.292	0.329	1.447	1.305	0.776	0.91	1.3	1.435	1.495	1.488	1.246	1.131	0.788	0.715	0.515	0.506	1.254	1.209	1.112
05:29:03	1.523	1.591	1.483	1.523	0.245	0.22	1.361	1.345	1.413	0.59	1.244	1.611	1.572	1.634	1.304	1.2	1.315	1.33	1.347	1.032	1.148	0.938	1.314	1.242	1.013	1.103	0.829	0.513	0.417	0.366	0.31	0.348	1.498	1.367	0.837	0.972	1.372	1.498	1.518	1.503	1.288	1.177	0.82	0.746	0.554	0.545	1.283	1.243	1.16
05:39:03	1.535	1.6	1.511	1.55	0.257	0.233	1.395	1.38	1.442	0.658	1.324	1.644	1.615	1.669	1.329	1.233	1.372	1.381	1.398	1.099	1.187	0.991	1.353	1.287	1.1	1.192	0.878	0.547	0.449	0.391	0.325	0.367	1.541	1.424	0.898	1.031	1.436	1.561	1.54	1.52	1.329	1.222	0.852	0.776	0.596	0.588	1.307	1.272	1.204
05:49:03	1.548	1.608	1.538	1.574	0.266	0.244	1.423	1.412	1.472	0.729	1.397	1.675	1.652	1.703	1.351	1.261	1.422	1.43	1.447	1.163	1.224	1.038	1.386	1.328	1.177	1.28	0.926	0.583	0.482	0.419	0.342	0.388	1.578	1.475	0.961	1.088	1.492	1.612	1.562	1.546	1.365	1.263	0.882	0.805	0.639	0.633	1.326	1.298	1.248
05:59:03	1.555	1.615	1.565	1.596	0.276	0.252	1.454	1.44	1.495	0.801	1.46	1.702	1.688	1.731	1.372	1.285	1.464	1.47	1.491	1.225	1.257	1.087	1.419	1.366	1.256	1.364	0.974	0.62	0.517	0.449	0.361	0.412	1.609	1.519	1.019	1.14	1.54	1.662	1.586	1.571	1.401	1.304	0.909	0.833	0.69	0.68	1.344	1.318	1.29
06:09:03	1.562	1.619	1.594	1.617	0.287	0.263	1.479	1.467	1.517	0.87	1.517	1.725	1.72	1.754	1.392	1.307	1.502	1.508	1.531	1.283	1.287	1.13	1.448	1.4	1.328	1.441	1.019	0.657	0.558	0.482	0.38	0.437	1.636	1.557	1.075	1.189	1.583	1.704	1.607	1.591	1.435	1.34	0.936	0.859	0.739	0.727	1.358	1.338	1.331
06:19:03	1.572	1.625	1.611	1.632	0.293	0.269	1.503	1.494	1.538	0.935	1.567	1.745	1.748	1.777	1.41	1.325	1.536	1.541	1.567	1.338	1.315	1.169	1.475	1.429	1.397	1.513	1.062	0.696	0.601	0.516	0.401	0.465	1.659	1.589	1.126	1.237	1.622	1.738	1.632	1.604	1.464	1.374	0.96	0.883	0.783	0.774	1.373	1.354	1.373
06:29:03	1.581	1.626	1.63	1.647	0.302	0.28	1.526	1.516	1.561	0.998	1.611	1.762	1.774	1.799	1.428	1.345	1.566	1.569	1.599	1.388	1.339	1.206	1.499	1.458	1.457	1.574	1.104	0.735	0.646	0.553	0.424	0.496	1.676	1.616	1.175	1.28	1.655	1.764	1.65	1.612	1.492	1.408	0.981	0.907	0.83	0.821	1.386	1.369	1.412
06:39:03	1.591	1.628	1.652	1.662	0.313	0.285	1.548	1.54	1.581	1.054	1.649	1.776	1.794	1.815	1.445	1.359	1.595	1.594	1.626	1.435	1.362	1.24	1.521	1.485	1.513	1.625	1.145	0.775	0.696	0.595	0.449	0.529	1.689	1.64	1.22	1.319	1.683	1.785	1.667	1.619	1.518	1.439	1.002	0.928	0.876	0.864	1.394	1.381	1.452
06:49:03	1.598	1.627	1.667	1.685	0.326	0.292	1.569	1.563	1.599	1.104	1.682	1.787	1.814	1.833	1.464	1.373	1.621	1.616	1.65	1.477	1.384	1.27	1.538	1.508	1.558	1.668	1.184	0.815	0.75	0.638	0.478	0.568	1.7	1.658	1.262	1.357	1.707	1.803	1.68	1.627	1.54	1.467	1.02	0.946	0.923	0.909	1.4	1.39	1.488
06:59:03	1.601	1.628	1.694	1.694	0.344	0.302	1.598	1.582	1.618	1.15	1.711	1.796	1.834	1.847	1.486	1.385	1.642	1.637	1.67	1.514	1.403	1.298	1.552	1.53	1.6	1.705	1.223	0.857	0.809	0.686	0.506	0.609	1.708	1.674	1.301	1.391	1.727	1.82	1.693	1.635	1.561	1.492	1.036	0.964	0.964	0.946	1.407	1.4	1.523
07:09:03	1.61	1.633	1.726	1.709	0.369	0.316	1.619	1.601	1.632	1.194	1.734	1.805	1.849	1.859	1.512	1.393	1.661	1.654	1.687	1.549	1.42	1.326	1.57	1.545	1.637	1.736	1.26	0.901	0.873	0.737	0.539	0.654	1.715	1.687	1.336	1.422	1.745	1.831	1.703	1.645	1.58	1.516	1.051	0.981	1.001	0.985	1.416	1.407	1.554
07:19:03	1.611	1.635	1.738	1.728	0.396	0.333	1.646	1.624	1.648	1.232	1.755	1.813	1.864	1.871	1.526	1.408	1.679	1.668	1.702	1.579	1.435	1.35	1.587	1.559	1.667	1.759	1.297	0.944	0.94	0.792	0.575	0.702	1.72	1.696	1.368	1.452	1.759	1.844	1.713	1.652	1.597	1.536	1.066	0.995	1.032	1.019	1.422	1.415	1.584
07:29:03	1.616	1.638	1.758	1.742	0.429	0.351	1.659	1.648	1.662	1.268	1.773	1.821	1.876	1.881	1.544	1.42	1.692	1.683	1.714	1.604	1.448	1.372	1.605	1.575	1.691	1.78	1.337	0.986	1.005	0.853	0.614	0.75	1.725	1.703	1.397	1.477	1.771	1.849	1.721	1.658	1.613	1.555	1.076	1.008	1.058	1.047	1.428	1.421	1.614
07:39:03	1.624	1.639	1.763	1.759	0.467	0.373	1.672	1.668	1.676	1.3	1.789	1.826	1.886	1.89	1.563	1.436	1.706	1.693	1.725	1.627	1.465	1.39	1.623	1.593	1.714	1.796	1.373	1.028	1.072	0.916	0.658	0.806	1.731	1.711	1.425	1.501	1.78	1.854	1.73	1.662	1.627	1.572	1.086	1.018	1.083	1.071	1.438	1.43	1.639
07:49:03	1.624	1.64	1.777	1.776	0.511	0.407	1.697	1.684	1.689	1.329	1.8	1.833	1.896	1.899	1.582	1.464	1.718	1.705	1.733	1.647	1.476	1.409	1.637	1.613	1.731	1.81	1.412	1.069	1.139	0.98	0.706	0.865	1.736	1.718	1.45	1.521	1.789	1.856	1.737	1.664	1.641	1.589	1.101	1.03	1.104	1.09	1.445	1.44	1.664
07:59:03	1.628	1.639	1.784	1.779	0.556	0.44	1.706	1.693	1.711	1.359	1.809	1.838	1.905	1.904	1.602	1.481	1.729	1.715	1.741	1.665	1.485	1.429	1.652	1.629	1.746	1.819	1.45	1.109	1.204	1.046	0.757	0.93	1.74	1.722	1.471	1.542	1.791	1.856	1.742	1.665	1.653	1.604	1.108	1.04	1.122	1.108	1.454	1.45	1.684
08:09:03	1.633	1.642	1.8	1.788	0.614	0.475	1.732	1.707	1.738	1.39	1.818	1.844	1.913	1.911	1.622	1.493	1.736	1.724	1.747	1.68	1.501	1.441	1.666	1.646	1.757	1.827	1.485	1.15	1.266	1.111	0.81	0.995	1.743	1.729	1.491	1.56	1.793	1.856	1.747	1.667	1.667	1.618	1.117	1.048	1.136	1.125	1.464	1.459	1.702
08:19:03	1.638	1.638	1.822	1.801	0.672	0.522	1.742	1.718	1.744	1.415	1.825	1.848	1.918	1.915	1.638	1.521	1.744	1.729	1.752	1.692	1.507	1.458	1.679	1.66	1.767	1.833	1.52	1.19	1.326	1.174	0.866	1.064	1.745	1.734	1.508	1.578	1.793	1.855	1.751	1.668	1.677	1.634	1.123	1.057	1.151	1.14	1.474	1.469	1.721
08:29:03	1.639	1.636	1.818	1.812	0.732	0.568	1.754	1.735	1.755	1.44	1.831	1.852	1.924	1.917	1.649	1.54	1.752	1.736	1.755	1.704	1.518	1.472	1.689	1.675	1.774	1.839	1.55	1.228	1.378	1.236	0.925	1.135	1.746	1.739	1.526	1.595	1.791	1.854	1.754	1.668	1.688	1.645	1.134	1.063	1.165	1.154	1.483	1.48	1.736
08:39:03	1.642	1.632	1.815	1.819	0.792	0.622	1.771	1.759	1.756	1.462	1.839	1.855	1.927	1.92	1.656	1.561	1.757	1.741	1.76	1.715	1.533	1.484	1.702	1.687	1.78	1.841	1.578	1.267	1.428	1.295	0.989	1.201	1.75	1.742	1.542	1.61	1.789	1.853	1.752	1.667	1.698	1.656	1.139	1.078	1.178	1.169	1.499	1.489	1.746
08:49:03	1.643	1.625	1.815	1.826	0.847	0.67	1.781	1.753	1.763	1.482	1.842	1.858	1.931	1.922	1.665	1.568	1.758	1.745	1.764	1.723	1.543	1.497	1.71	1.698	1.783	1.847	1.608	1.305	1.47	1.347	1.05	1.265	1.747	1.744	1.558	1.625	1.786	1.852	1.75	1.668	1.705	1.666	1.15	1.087	1.189	1.179	1.502	1.497	1.753
08:59:03	1.645	1.619	1.835	1.832	0.898	0.729	1.778	1.76	1.777	1.504	1.846	1.861	1.933	1.923	1.67	1.586	1.763	1.749	1.767	1.73	1.554	1.508	1.721	1.709	1.787	1.851	1.633	1.342	1.509	1.394	1.119	1.321	1.747	1.746	1.573	1.635	1.784	1.847	1.752	1.67	1.711	1.675	1.158	1.095	1.197	1.189	1.514	1.507	1.762
09:09:03	1.647	1.611	1.826	1.834	0.947	0.783	1.774	1.766	1.782	1.529	1.855	1.863	1.936	1.923	1.675	1.593	1.77	1.753	1.77	1.736	1.564	1.516	1.73	1.719	1.789	1.852	1.657	1.379	1.543	1.436	1.185	1.373	1.744	1.749	1.585	1.652	1.781	1.847	1.752	1.674	1.719	1.685	1.169	1.095	1.205	1.199	1.521	1.522	1.769
09:19:03	1.646	1.604	1.832	1.842	0.99	0.84	1.777	1.779	1.782	1.538	1.857	1.863	1.935	1.922	1.681	1.608	1.776	1.758	1.775	1.741	1.573	1.525	1.738	1.728	1.793	1.853	1.678	1.414	1.574	1.474	1.251	1.417	1.744	1.748	1.596	1.662	1.779	1.846	1.754	1.677	1.729	1.69	1.163	1.099	1.215	1.206	1.532	1.527	1.773
09:29:03	1.646	1.595	1.837	1.852	1.027	0.89	1.79	1.784	1.789	1.558	1.858	1.867	1.935	1.92	1.685	1.614	1.781	1.762	1.776	1.744	1.582	1.542	1.744	1.737	1.795	1.854	1.698	1.448	1.601	1.508	1.311	1.46	1.742	1.752	1.607	1.669	1.776	1.843	1.755	1.679	1.735	1.699	1.166	1.108	1.22	1.215	1.539	1.536	1.773
09:39:03	1.647	1.589	1.844	1.851	1.059	0.934	1.795	1.788	1.795	1.576	1.859	1.868	1.935	1.919	1.688	1.618	1.781	1.766	1.779	1.748	1.59	1.548	1.751	1.744	1.798	1.854	1.717	1.476	1.626	1.539	1.367	1.496	1.742	1.753	1.618	1.678	1.774	1.84	1.756	1.682	1.742	1.703	1.174	1.117	1.228	1.221	1.55	1.547	1.783
09:49:03	1.646	1.586	1.842	1.857	1.089	0.976	1.83	1.803	1.799	1.589	1.865	1.868	1.934	1.918	1.692	1.625	1.786	1.771	1.78	1.752	1.598	1.556	1.756	1.75	1.799	1.858	1.734	1.507	1.646	1.566	1.414	1.529	1.74	1.753	1.631	1.689	1.772	1.84	1.756	1.684	1.746	1.712	1.177	1.114	1.232	1.225	1.56	1.555	1.783
09:59:03	1.645	1.577	1.846	1.858	1.101	1.012	1.81	1.8	1.805	1.607	1.864	1.866	1.932	1.916	1.699	1.631	1.79	1.777	1.782	1.755	1.608	1.567	1.762	1.755	1.8	1.859	1.751	1.534	1.664	1.592	1.458	1.561	1.738	1.751	1.642	1.696	1.769	1.836	1.757	1.688	1.75	1.718	1.181	1.152	1.237	1.231	1.574	1.564	1.787
10:09:03	1.646	1.571	1.848	1.859	1.107	1.044	1.827	1.806	1.809	1.623	1.864	1.864	1.931	1.915	1.702	1.636	1.796	1.781	1.784	1.757	1.617	1.578	1.765	1.76	1.802	1.862	1.766	1.564	1.683	1.615	1.495	1.585	1.737	1.754	1.649	1.707	1.769	1.84	1.76	1.692	1.758	1.724	1.187	1.13	1.245	1.237	1.583	1.577	1.788
10:19:03	1.644	1.566	1.853	1.859	1.113	1.062	1.82	1.811	1.813	1.648	1.868	1.867	1.929	1.914	1.706	1.64	1.799	1.783	1.785	1.761	1.629	1.588	1.77	1.765	1.806	1.867	1.776	1.587	1.701	1.633	1.531	1.607	1.736	1.754	1.657	1.713	1.767	1.831	1.763	1.692	1.762	1.732	1.2	1.126	1.248	1.241	1.593	1.586	1.789
10:29:03	1.645	1.565	1.854	1.859	1.214	1.077	1.825	1.815	1.82	1.657	1.868	1.867	1.928	1.912	1.709	1.644	1.801	1.785	1.784	1.764	1.643	1.594	1.775	1.771	1.807	1.867	1.789	1.605	1.715	1.651	1.56	1.624	1.738	1.754	1.667	1.715	1.767	1.831	1.767	1.693	1.768	1.734	1.199	1.144	1.254	1.246	1.604	1.596	1.796
10:39:03	1.643	1.561	1.856	1.857	1.076	1.087	1.831	1.821	1.816	1.666	1.867	1.868	1.926	1.91	1.713	1.647	1.803	1.787	1.784	1.768	1.65	1.604	1.779	1.774	1.81	1.866	1.799	1.627	1.728	1.67	1.588	1.638	1.738	1.753	1.675	1.723	1.766	1.825	1.767	1.694	1.77	1.744	1.212	1.147	1.258	1.25	1.617	1.606	1.792
10:49:03	1.643	1.56	1.856	1.857	1.078	1.097	1.833	1.824	1.817	1.679	1.866	1.869	1.924	1.908	1.717	1.651	1.807	1.791	1.786	1.769	1.653	1.615	1.784	1.779	1.81	1.865	1.806	1.649	1.738	1.683	1.612	1.65	1.738	1.752	1.683	1.729	1.767	1.825	1.768	1.696	1.776	1.746	1.207	1.147	1.261	1.253	1.626	1.62	1.795
10:59:03	1.644	1.558	1.856	1.853	1.073	1.097	1.837	1.828	1.819	1.688	1.864	1.871	1.921	1.906	1.722	1.652	1.808	1.794	1.785	1.771	1.665	1.62	1.788	1.783	1.811	1.866	1.814	1.666	1.744	1.697	1.631	1.657	1.741	1.749	1.698	1.733	1.767	1.827	1.773	1.698	1.777	1.753	1.212	1.165	1.263	1.255	1.635	1.626	1.793
11:09:03	1.645	1.555	1.857	1.845	1.077	1.116	1.839	1.83	1.821	1.737	1.865	1.871	1.92	1.905	1.725	1.655	1.81	1.798	1.786	1.774	1.672	1.626	1.79	1.787	1.812	1.864	1.818	1.68	1.751	1.707	1.647	1.663	1.741	1.749	1.696	1.737	1.769	1.826	1.774	1.699	1.776	1.757	1.219	1.165	1.266	1.258	1.644	1.635	1.793
11:19:03	1.647	1.552	1.856	1.84	1.082	1.125	1.842	1.833	1.824	1.708	1.865	1.873	1.918	1.903	1.728	1.657	1.815	1.801	1.784	1.773	1.674	1.634	1.793	1.791	1.813	1.865	1.815	1.695	1.758	1.716	1.659	1.672	1.742	1.748	1.703	1.74	1.769	1.824	1.776	1.702	1.783	1.759	1.228	1.166	1.269	1.26	1.652	1.642	1.795
11:29:03	1.648	1.552	1.854	1.835	1.076	1.135	1.843	1.835	1.825	1.721	1.865	1.873	1.915	1.901	1.733	1.657	1.816	1.804	1.784	1.772	1.681	1.642	1.797	1.794	1.811	1.861	1.819	1.711	1.764	1.726	1.67	1.675	1.742	1.75	1.707	1.745	1.769	1.821	1.774	1.704	1.783	1.76	1.234	1.168	1.271	1.263	1.659	1.651	1.792
11:39:03	1.65	1.559	1.854	1.831	1.074	1.135	1.844	1.836	1.827	1.724	1.863	1.873	1.913	1.899	1.736	1.661	1.818	1.805	1.788	1.774	1.689	1.648	1.799	1.797	1.812	1.86	1.822	1.723	1.771	1.732	1.674	1.68	1.743	1.75	1.714	1.749	1.77	1.82	1.777	1.705	1.784	1.763	1.237	1.173	1.273	1.266	1.668	1.659	1.792
11:49:03	1.653	1.56	1.853	1.829	1.072	1.143	1.845	1.838	1.828	1.729	1.864	1.874	1.91	1.898	1.74	1.66	1.822	1.809	1.788	1.776	1.692	1.655	1.801	1.8	1.811	1.861	1.826	1.734	1.778	1.74	1.679	1.685	1.744	1.751	1.719	1.752	1.766	1.819	1.777	1.707	1.784	1.763	1.246	1.183	1.276	1.269	1.675	1.667	1.792
11:59:03	1.655	1.563	1.853	1.827	1.068	1.142	1.846	1.837	1.83	1.738	1.863	1.873	1.908	1.896	1.745	1.663	1.822	1.808	1.788	1.775	1.696	1.66	1.802	1.803	1.811	1.861	1.817	1.741	1.783	1.745	1.684	1.688	1.745	1.751	1.722	1.753	1.763	1.815	1.778	1.71	1.787	1.767	1.259	1.192	1.279	1.27	1.68	1.674	1.791
12:09:03	1.658	1.564	1.852	1.825	1.063	1.144	1.847	1.839	1.832	1.742	1.862	1.87	1.905	1.893	1.748	1.666	1.827	1.812	1.788	1.775	1.699	1.665	1.803	1.805	1.81	1.86	1.818	1.748	1.787	1.751	1.691	1.691	1.744	1.75	1.724	1.754	1.76	1.811	1.775	1.71	1.787	1.768	1.259	1.197	1.282	1.273	1.685	1.681	1.79
12:19:03	1.659	1.565	1.851	1.824	1.06	1.145	1.848	1.839	1.834	1.746	1.863	1.869	1.903	1.891	1.752	1.668	1.827	1.814	1.787	1.776	1.705	1.67	1.805	1.805	1.811	1.861	1.816	1.752	1.79	1.759	1.694	1.694	1.745	1.75	1.726	1.757	1.761	1.81	1.777	1.71	1.789	1.769	1.264	1.204	1.284	1.275	1.69	1.685	1.79
12:29:03	1.662	1.569	1.85	1.825	1.053	1.146	1.85	1.84	1.837	1.748	1.864	1.868	1.9	1.891	1.755	1.672	1.831	1.817	1.789	1.777	1.71	1.675	1.806	1.807	1.808	1.861	1.818	1.759	1.798	1.762	1.698	1.698	1.746	1.753	1.73	1.758	1.765	1.81	1.777	1.713	1.79	1.772	1.276	1.21	1.288	1.278	1.696	1.69	1.789
12:39:03	1.663	1.567	1.849	1.825	1.044	1.143	1.85	1.841	1.84	1.758	1.862	1.865	1.897	1.891	1.758	1.672	1.829	1.816	1.788	1.777	1.715	1.677	1.807	1.809	1.809	1.863	1.819	1.759	1.8	1.768	1.701	1.699	1.744	1.751	1.732	1.76	1.763	1.809	1.777	1.713	1.789	1.774	1.28	1.216	1.291	1.281	1.701	1.695	1.788
12:49:03	1.663	1.573	1.849	1.825	1.045	1.142	1.851	1.842	1.841	1.762	1.861	1.863	1.896	1.888	1.762	1.672	1.832	1.821	1.789	1.778	1.718	1.681	1.807	1.81	1.811	1.865	1.819	1.758	1.803	1.772	1.706	1.701	1.742	1.752	1.736	1.762	1.764	1.808	1.777	1.714	1.79	1.774	1.286	1.23	1.293	1.282	1.705	1.7	1.787
12:59:03	1.665	1.577	1.849	1.826	1.037	1.139	1.851	1.843	1.845	1.762	1.861	1.861	1.893	1.886	1.766	1.672	1.832	1.819	1.788	1.777	1.722	1.684	1.808	1.81	1.809	1.864	1.819	1.759	1.806	1.776	1.706	1.704	1.742	1.75	1.737	1.763	1.761	1.807	1.776	1.714	1.792	1.776	1.295	1.23	1.295	1.285	1.706	1.705	1.787
13:09:03	1.663	1.584	1.85	1.826	1.033	1.137	1.851	1.843	1.847	1.763	1.859	1.858	1.889	1.884	1.77	1.673	1.833	1.822	1.789	1.779	1.725	1.688	1.809	1.81	1.808	1.863	1.82	1.762	1.809	1.78	1.709	1.705	1.741	1.75	1.74	1.765	1.762	1.809	1.775	1.714	1.793	1.777	1.304	1.245	1.298	1.288	1.71	1.707	1.787
13:19:03	1.663	1.592	1.851	1.827	1.028	1.131	1.851	1.845	1.85	1.765	1.855	1.857	1.889	1.884	1.773	1.673	1.835	1.822	1.788	1.778	1.73	1.692	1.809	1.809	1.808	1.862	1.821	1.759	1.813	1.783	1.712	1.707	1.74	1.751	1.742	1.766	1.762	1.809	1.774	1.713	1.792	1.779	1.317	1.251	1.301	1.291	1.713	1.71	1.784
13:29:03	1.661	1.592	1.851	1.828	1.026	1.128	1.852	1.845	1.852	1.763	1.852	1.854	1.886	1.881	1.775	1.671	1.836	1.823	1.786	1.777	1.735	1.696	1.809	1.81	1.809	1.863	1.82	1.762	1.813	1.787	1.711	1.708	1.738	1.749	1.743	1.766	1.759	1.808	1.774	1.713	1.793	1.78	1.32	1.268	1.304	1.293	1.715	1.715	1.783
13:39:03	1.66	1.595	1.852	1.83	1.024	1.124	1.853	1.845	1.855	1.771	1.849	1.853	1.884	1.88	1.777	1.673	1.838	1.824	1.786	1.777	1.741	1.701	1.809	1.812	1.81	1.859	1.819	1.762	1.813	1.79	1.714	1.709	1.737	1.749	1.746	1.768	1.762	1.808	1.774	1.714	1.795	1.782	1.329	1.271	1.307	1.295	1.717	1.716	1.779
13:49:03	1.66	1.601	1.853	1.832	1.026	1.121	1.854	1.846	1.857	1.778	1.845	1.853	1.884	1.88	1.78	1.675	1.839	1.825	1.787	1.778	1.741	1.705	1.807	1.811	1.81	1.858	1.819	1.762	1.814	1.793	1.717	1.709	1.735	1.75	1.748	1.768	1.757	1.81	1.773	1.714	1.796	1.782	1.337	1.281	1.31	1.297	1.72	1.719	1.778
13:59:03	1.659	1.603	1.854	1.833	1.024	1.12	1.853	1.847	1.859	1.779	1.841	1.851	1.88	1.879	1.782	1.677	1.837	1.825	1.785	1.778	1.744	1.709	1.807	1.81	1.806	1.855	1.819	1.76	1.818	1.795	1.717	1.71	1.735	1.749	1.749	1.768	1.756	1.807	1.772	1.714	1.796	1.785	1.349	1.288	1.312	1.3	1.724	1.722	1.775
14:09:03	1.66	1.607	1.854	1.835	1.026	1.12	1.855	1.847	1.861	1.782	1.839	1.85	1.877	1.879	1.785	1.679	1.838	1.829	1.786	1.778	1.749	1.712	1.805	1.81	1.804	1.853	1.819	1.761	1.818	1.8	1.721	1.711	1.735	1.747	1.752	1.768	1.759	1.807	1.771	1.713	1.798	1.786	1.355	1.303	1.317	1.303	1.727	1.726	1.773
14:19:03	1.66	1.618	1.854	1.836	1.025	1.119	1.854	1.849	1.863	1.782	1.834	1.849	1.877	1.878	1.787	1.68	1.841	1.827	1.784	1.778	1.75	1.715	1.804	1.808	1.801	1.851	1.819	1.759	1.819	1.8	1.722	1.708	1.735	1.746	1.752	1.769	1.76	1.806	1.77	1.715	1.798	1.788	1.367	1.309	1.319	1.305	1.729	1.728	1.771
14:29:03	1.664	1.62	1.854	1.837	1.024	1.119	1.855	1.849	1.864	1.784	1.831	1.849	1.875	1.878	1.789	1.683	1.839	1.827	1.783	1.779	1.749	1.718	1.802	1.807	1.795	1.848	1.821	1.757	1.819	1.802	1.722	1.71	1.733	1.745	1.753	1.769	1.759	1.804	1.768	1.716	1.798	1.788	1.372	1.324	1.323	1.308	1.729	1.731	1.769
14:39:03	1.667	1.625	1.855	1.839	1.025	1.12	1.856	1.849	1.866	1.787	1.829	1.849	1.872	1.878	1.791	1.686	1.837	1.827	1.782	1.779	1.754	1.721	1.801	1.806	1.792	1.847	1.821	1.754	1.821	1.803	1.723	1.708	1.732	1.745	1.756	1.769	1.76	1.804	1.767	1.715	1.798	1.789	1.379	1.334	1.325	1.31	1.731	1.735	1.769
14:49:03	1.665	1.627	1.855	1.84	1.024	1.121	1.856	1.85	1.867	1.791	1.827	1.849	1.87	1.875	1.792	1.687	1.839	1.826	1.781	1.778	1.756	1.722	1.799	1.804	1.785	1.843	1.82	1.754	1.82	1.805	1.724	1.707	1.731	1.744	1.756	1.769	1.76	1.803	1.766	1.714	1.798	1.791	1.389	1.341	1.328	1.314	1.734	1.734	1.767
14:59:03	1.665	1.632	1.855	1.842	1.024	1.122	1.856	1.85	1.868	1.796	1.824	1.849	1.87	1.875	1.794	1.688	1.839	1.827	1.78	1.778	1.761	1.727	1.797	1.803	1.781	1.841	1.819	1.754	1.819	1.808	1.727	1.706	1.732	1.744	1.758	1.769	1.756	1.803	1.763	1.714	1.798	1.792	1.396	1.347	1.331	1.316	1.736	1.74	1.767
15:09:03	1.667	1.634	1.856	1.843	1.024	1.123	1.856	1.851	1.869	1.798	1.822	1.849	1.866	1.874	1.795	1.689	1.837	1.826	1.778	1.778	1.763	1.734	1.794	1.801	1.778	1.839	1.82	1.756	1.82	1.807	1.727	1.702	1.731	1.744	1.759	1.768	1.756	1.802	1.76	1.712	1.797	1.793	1.402	1.357	1.334	1.319	1.738	1.74	1.766
15:19:03	1.667	1.646	1.856	1.843	1.025	1.123	1.858	1.852	1.87	1.803	1.821	1.849	1.868	1.874	1.796	1.69	1.837	1.825	1.776	1.777	1.766	1.735	1.792	1.801	1.773	1.838	1.82	1.757	1.818	1.809	1.727	1.7	1.732	1.74	1.759	1.768	1.758	1.802	1.755	1.709	1.797	1.793	1.408	1.365	1.337	1.322	1.74	1.743	1.766
15:29:03	1.668	1.649	1.857	1.844	1.026	1.124	1.858	1.853	1.871	1.803	1.82	1.848	1.864	1.874	1.796	1.69	1.835	1.827	1.775	1.777	1.768	1.736	1.787	1.799	1.769	1.836	1.817	1.759	1.819	1.811	1.727	1.698	1.731	1.742	1.76	1.767	1.756	1.804	1.751	1.708	1.797	1.793	1.414	1.372	1.339	1.325	1.74	1.743	1.766
15:39:03	1.671	1.652	1.857	1.845	1.027	1.124	1.858	1.853	1.872	1.805	1.819	1.848	1.863	1.871	1.797	1.69	1.834	1.823	1.774	1.776	1.771	1.74	1.784	1.798	1.765	1.834	1.816	1.755	1.817	1.812	1.727	1.696	1.732	1.743	1.759	1.767	1.761	1.802	1.746	1.706	1.797	1.794	1.418	1.379	1.342	1.328	1.742	1.744	1.765
15:49:03	1.679	1.654	1.858	1.845	1.026	1.124	1.86	1.854	1.872	1.809	1.819	1.848	1.86	1.871	1.798	1.692	1.832	1.823	1.772	1.775	1.772	1.74	1.781	1.797	1.76	1.834	1.815	1.753	1.817	1.812	1.726	1.693	1.733	1.741	1.759	1.766	1.763	1.803	1.741	1.703	1.796	1.796	1.424	1.384	1.344	1.33	1.742	1.746	1.765
15:59:03	1.679	1.659	1.857	1.847	1.03	1.125	1.86	1.855	1.873	1.811	1.819	1.849	1.86	1.87	1.799	1.691	1.832	1.82	1.77	1.774	1.775	1.741	1.779	1.796	1.758	1.834	1.815	1.753	1.817	1.813	1.727	1.691	1.734	1.743	1.758	1.767	1.763	1.803	1.736	1.699	1.795	1.796	1.428	1.391	1.346	1.333	1.744	1.748	1.765
16:09:03	1.68	1.661	1.858	1.847	1.028	1.127	1.861	1.857	1.873	1.814	1.819	1.85	1.858	1.87	1.8	1.693	1.829	1.818	1.77	1.773	1.776	1.747	1.776	1.794	1.756	1.833	1.816	1.751	1.818	1.814	1.727	1.687	1.732	1.745	1.756	1.765	1.763	1.802	1.73	1.696	1.795	1.796	1.433	1.398	1.349	1.336	1.745	1.748	1.766
16:19:03	1.685	1.671	1.859	1.848	1.03	1.13	1.863	1.857	1.875	1.815	1.82	1.849	1.857	1.871	1.8	1.695	1.83	1.816	1.768	1.773	1.777	1.749	1.773	1.794	1.753	1.833	1.816	1.752	1.819	1.814	1.726	1.687	1.732	1.744	1.752	1.763	1.761	1.801	1.726	1.693	1.794	1.795	1.439	1.404	1.351	1.338	1.744	1.75	1.766
16:29:03	1.684	1.668	1.858	1.848	1.031	1.131	1.864	1.858	1.876	1.816	1.819	1.848	1.855	1.867	1.8	1.694	1.826	1.813	1.766	1.771	1.775	1.749	1.77	1.793	1.751	1.833	1.814	1.751	1.816	1.815	1.724	1.682	1.732	1.744	1.75	1.759	1.76	1.803	1.72	1.688	1.793	1.794	1.442	1.409	1.353	1.341	1.745	1.752	1.766
16:39:03	1.685	1.674	1.859	1.849	1.031	1.133	1.865	1.86	1.876	1.817	1.821	1.849	1.854	1.868	1.8	1.695	1.827	1.811	1.765	1.769	1.776	1.753	1.767	1.792	1.75	1.832	1.811	1.752	1.814	1.815	1.724	1.681	1.732	1.743	1.747	1.756	1.76	1.804	1.715	1.686	1.793	1.795	1.447	1.415	1.355	1.343	1.746	1.749	1.764
16:49:03	1.691	1.674	1.859	1.85	1.032	1.136	1.866	1.86	1.876	1.819	1.821	1.849	1.852	1.866	1.801	1.696	1.824	1.812	1.762	1.767	1.779	1.755	1.764	1.791	1.749	1.832	1.809	1.755	1.813	1.815	1.723	1.677	1.732	1.747	1.744	1.755	1.764	1.805	1.71	1.68	1.792	1.794	1.45	1.421	1.357	1.345	1.746	1.752	1.765
16:59:03	1.693	1.675	1.859	1.85	1.033	1.137	1.865	1.861	1.877	1.819	1.821	1.85	1.852	1.866	1.801	1.694	1.823	1.811	1.762	1.768	1.778	1.757	1.761	1.789	1.748	1.831	1.81	1.751	1.811	1.816	1.722	1.675	1.734	1.747	1.743	1.752	1.767	1.808	1.704	1.675	1.79	1.794	1.455	1.427	1.359	1.347	1.746	1.751	1.764
17:09:03	1.698	1.678	1.859	1.851	1.034	1.139	1.866	1.862	1.877	1.82	1.821	1.849	1.85	1.866	1.802	1.694	1.821	1.81	1.76	1.765	1.782	1.756	1.757	1.788	1.748	1.83	1.809	1.754	1.806	1.813	1.718	1.672	1.734	1.748	1.739	1.75	1.768	1.809	1.7	1.673	1.789	1.793	1.459	1.432	1.36	1.349	1.746	1.748	1.763
17:19:03	1.697	1.683	1.861	1.853	1.034	1.142	1.866	1.864	1.877	1.823	1.821	1.849	1.849	1.866	1.802	1.696	1.82	1.809	1.758	1.764	1.784	1.757	1.754	1.787	1.747	1.831	1.808	1.754	1.806	1.812	1.718	1.669	1.732	1.745	1.736	1.748	1.766	1.81	1.697	1.669	1.788	1.792	1.463	1.437	1.362	1.35	1.746	1.752	1.763
17:29:03	1.7	1.685	1.86	1.853	1.036	1.144	1.867	1.864	1.878	1.823	1.821	1.849	1.849	1.867	1.801	1.694	1.819	1.807	1.757	1.764	1.78	1.759	1.75	1.786	1.746	1.83	1.809	1.754	1.803	1.812	1.717	1.667	1.733	1.744	1.733	1.746	1.768	1.811	1.693	1.662	1.789	1.792	1.467	1.443	1.364	1.351	1.748	1.753	1.763
17:39:03	1.704	1.686	1.861	1.854	1.037	1.145	1.868	1.864	1.878	1.824	1.821	1.849	1.847	1.866	1.805	1.696	1.817	1.805	1.755	1.762	1.78	1.759	1.749	1.785	1.747	1.83	1.808	1.75	1.801	1.81	1.714	1.664	1.733	1.743	1.729	1.744	1.771	1.814	1.689	1.657	1.787	1.792	1.47	1.447	1.365	1.353	1.748	1.753	1.762
17:49:03	1.704	1.685	1.863	1.855	1.037	1.148	1.867	1.865	1.878	1.824	1.82	1.849	1.847	1.866	1.808	1.697	1.815	1.805	1.753	1.761	1.78	1.76	1.747	1.783	1.747	1.829	1.807	1.75	1.797	1.808	1.712	1.662	1.734	1.745	1.727	1.742	1.772	1.813	1.687	1.653	1.787	1.792	1.476	1.452	1.366	1.354	1.748	1.752	1.762
17:59:03	1.706	1.685	1.863	1.855	1.04	1.151	1.869	1.864	1.878	1.826	1.819	1.848	1.844	1.864	1.808	1.696	1.813	1.803	1.752	1.76	1.78	1.763	1.745	1.783	1.747	1.828	1.806	1.753	1.795	1.806	1.709	1.66	1.735	1.745	1.724	1.742	1.77	1.816	1.683	1.647	1.787	1.791	1.478	1.456	1.367	1.355	1.75	1.752	1.761
18:09:03	1.711	1.687	1.863	1.857	1.041	1.153	1.868	1.864	1.879	1.827	1.818	1.848	1.843	1.862	1.809	1.696	1.811	1.801	1.75	1.759	1.782	1.761	1.744	1.781	1.748	1.828	1.804	1.752	1.793	1.803	1.706	1.658	1.734	1.742	1.722	1.74	1.773	1.817	1.68	1.64	1.785	1.79	1.483	1.462	1.368	1.356	1.752	1.752	1.76
18:19:03	1.709	1.689	1.863	1.858	1.043	1.155	1.869	1.864	1.878	1.826	1.817	1.847	1.842	1.864	1.811	1.697	1.811	1.797	1.749	1.756	1.786	1.764	1.742	1.779	1.748	1.827	1.803	1.751	1.791	1.801	1.701	1.656	1.733	1.744	1.72	1.739	1.769	1.818	1.679	1.635	1.786	1.79	1.486	1.466	1.368	1.357	1.751	1.757	1.758
18:29:03	1.709	1.692	1.864	1.861	1.045	1.159	1.867	1.864	1.878	1.828	1.815	1.849	1.841	1.864	1.815	1.698	1.809	1.795	1.747	1.755	1.789	1.766	1.741	1.778	1.748	1.827	1.804	1.75	1.788	1.799	1.697	1.653	1.732	1.743	1.719	1.739	1.771	1.819	1.677	1.63	1.786	1.788	1.49	1.471	1.37	1.359	1.752	1.756	1.759
18:39:03	1.715	1.691	1.864	1.862	1.045	1.162	1.869	1.865	1.878	1.829	1.813	1.849	1.84	1.862	1.821	1.697	1.808	1.795	1.745	1.753	1.79	1.766	1.741	1.778	1.747	1.827	1.806	1.749	1.784	1.797	1.693	1.651	1.734	1.746	1.717	1.738	1.773	1.82	1.674	1.627	1.784	1.789	1.495	1.475	1.37	1.359	1.751	1.756	1.757
18:49:03	1.716	1.69	1.866	1.863	1.047	1.163	1.869	1.865	1.878	1.828	1.81	1.849	1.837	1.863	1.822	1.694	1.804	1.788	1.744	1.753	1.787	1.768	1.739	1.777	1.748	1.826	1.803	1.748	1.784	1.794	1.689	1.649	1.733	1.743	1.717	1.736	1.774	1.824	1.673	1.62	1.784	1.787	1.5	1.479	1.371	1.359	1.751	1.754	1.759
18:59:03	1.712	1.692	1.865	1.864	1.049	1.166	1.865	1.865	1.879	1.829	1.808	1.849	1.837	1.862	1.826	1.693	1.803	1.788	1.743	1.751	1.788	1.769	1.74	1.776	1.747	1.826	1.802	1.746	1.784	1.793	1.685	1.646	1.732	1.744	1.716	1.735	1.779	1.825	1.671	1.614	1.784	1.789	1.503	1.486	1.371	1.359	1.754	1.755	1.76
19:09:03	1.707	1.692	1.864	1.864	1.052	1.168	1.868	1.863	1.878	1.83	1.813	1.85	1.836	1.858	1.827	1.693	1.802	1.788	1.742	1.75	1.786	1.771	1.739	1.775	1.75	1.826	1.802	1.744	1.782	1.791	1.681	1.645	1.731	1.742	1.715	1.736	1.781	1.826	1.67	1.608	1.785	1.788	1.509	1.491	1.373	1.361	1.752	1.758	1.76
19:19:03	1.703	1.7	1.864	1.865	1.054	1.171	1.869	1.864	1.88	1.829	1.809	1.85	1.835	1.859	1.829	1.691	1.801	1.787	1.74	1.748	1.79	1.771	1.739	1.774	1.75	1.825	1.803	1.743	1.779	1.789	1.678	1.642	1.732	1.744	1.715	1.736	1.782	1.829	1.668	1.603	1.783	1.787	1.514	1.498	1.373	1.362	1.751	1.759	1.762
19:29:03	1.697	1.7	1.866	1.864	1.054	1.173	1.867	1.863	1.879	1.831	1.808	1.85	1.833	1.857	1.833	1.691	1.797	1.787	1.738	1.747	1.792	1.771	1.74	1.774	1.749	1.826	1.806	1.742	1.776	1.787	1.673	1.639	1.732	1.746	1.714	1.735	1.785	1.827	1.667	1.598	1.783	1.787	1.519	1.503	1.374	1.363	1.752	1.757	1.762
19:39:03	1.689	1.704	1.867	1.865	1.058	1.176	1.869	1.862	1.879	1.832	1.805	1.851	1.83	1.861	1.831	1.69	1.796	1.781	1.737	1.744	1.789	1.77	1.738	1.773	1.75	1.826	1.808	1.742	1.775	1.785	1.67	1.636	1.73	1.745	1.714	1.734	1.784	1.831	1.665	1.593	1.783	1.786	1.524	1.508	1.375	1.364	1.752	1.754	1.761
19:49:03	1.685	1.708	1.867	1.865	1.055	1.179	1.869	1.863	1.88	1.832	1.801	1.85	1.829	1.86	1.831	1.689	1.795	1.778	1.736	1.742	1.789	1.771	1.739	1.774	1.752	1.827	1.808	1.742	1.774	1.784	1.668	1.634	1.729	1.744	1.715	1.735	1.789	1.835	1.665	1.589	1.785	1.786	1.529	1.515	1.376	1.365	1.752	1.755	1.762
19:59:03	1.681	1.708	1.868	1.865	1.056	1.181	1.871	1.863	1.881	1.835	1.8	1.849	1.828	1.858	1.832	1.688	1.794	1.777	1.734	1.742	1.789	1.772	1.739	1.773	1.751	1.827	1.808	1.742	1.772	1.782	1.667	1.633	1.729	1.744	1.714	1.734	1.787	1.838	1.664	1.585	1.782	1.787	1.534	1.521	1.377	1.366	1.751	1.754	1.761
20:09:03	1.679	1.709	1.867	1.866	1.058	1.185	1.869	1.864	1.879	1.834	1.796	1.851	1.827	1.857	1.833	1.687	1.792	1.778	1.734	1.741	1.791	1.77	1.738	1.772	1.751	1.827	1.809	1.742	1.77	1.78	1.664	1.628	1.728	1.744	1.715	1.733	1.789	1.836	1.664	1.579	1.781	1.786	1.538	1.527	1.378	1.367	1.749	1.751	1.762
20:19:03	1.675	1.716	1.867	1.867	1.06	1.188	1.871	1.864	1.879	1.834	1.797	1.851	1.827	1.857	1.832	1.687	1.79	1.778	1.734	1.739	1.79	1.771	1.739	1.772	1.752	1.827	1.808	1.742	1.771	1.779	1.661	1.629	1.73	1.746	1.714	1.734	1.792	1.837	1.663	1.574	1.784	1.786	1.545	1.531	1.379	1.368	1.75	1.751	1.764
20:29:03	1.673	1.721	1.865	1.87	1.059	1.189	1.871	1.865	1.881	1.836	1.792	1.852	1.827	1.858	1.832	1.687	1.789	1.775	1.732	1.738	1.789	1.774	1.739	1.772	1.753	1.829	1.809	1.743	1.77	1.778	1.661	1.629	1.733	1.746	1.715	1.734	1.792	1.839	1.663	1.572	1.783	1.786	1.549	1.537	1.38	1.369	1.752	1.751	1.764
20:39:03	1.671	1.726	1.861	1.868	1.061	1.193	1.873	1.864	1.88	1.836	1.789	1.852	1.827	1.858	1.829	1.686	1.787	1.767	1.731	1.736	1.788	1.773	1.738	1.77	1.753	1.83	1.808	1.743	1.769	1.777	1.657	1.629	1.736	1.748	1.714	1.732	1.792	1.839	1.663	1.569	1.781	1.786	1.554	1.542	1.38	1.37	1.752	1.75	1.764
20:49:03	1.672	1.725	1.86	1.87	1.064	1.196	1.873	1.866	1.88	1.835	1.787	1.852	1.827	1.86	1.832	1.687	1.786	1.768	1.73	1.736	1.787	1.772	1.738	1.77	1.752	1.83	1.811	1.744	1.766	1.776	1.657	1.624	1.739	1.748	1.713	1.732	1.796	1.84	1.663	1.564	1.78	1.785	1.558	1.548	1.382	1.371	1.75	1.751	1.763
20:59:03	1.672	1.736	1.86	1.871	1.066	1.198	1.875	1.867	1.882	1.838	1.793	1.851	1.827	1.859	1.83	1.688	1.786	1.768	1.73	1.735	1.789	1.772	1.739	1.772	1.754	1.831	1.81	1.745	1.765	1.775	1.654	1.625	1.74	1.749	1.715	1.733	1.798	1.843	1.663	1.56	1.782	1.786	1.563	1.553	1.383	1.372	1.753	1.753	1.764
21:09:03	1.672	1.739	1.861	1.873	1.067	1.201	1.875	1.867	1.883	1.836	1.791	1.852	1.828	1.86	1.828	1.688	1.784	1.768	1.729	1.733	1.786	1.77	1.738	1.771	1.754	1.833	1.811	1.745	1.762	1.774	1.653	1.626	1.739	1.749	1.714	1.732	1.798	1.845	1.663	1.557	1.779	1.787	1.568	1.557	1.384	1.372	1.753	1.754	1.765
21:19:03	1.67	1.744	1.864	1.873	1.072	1.204	1.877	1.868	1.883	1.838	1.791	1.853	1.826	1.859	1.828	1.69	1.784	1.766	1.728	1.733	1.793	1.774	1.738	1.772	1.755	1.833	1.811	1.745	1.761	1.774	1.653	1.624	1.741	1.751	1.714	1.733	1.802	1.846	1.664	1.556	1.78	1.787	1.573	1.563	1.385	1.373	1.754	1.756	1.765
21:29:03	1.669	1.748	1.865	1.874	1.088	1.207	1.877	1.868	1.885	1.84	1.787	1.852	1.825	1.861	1.826	1.69	1.782	1.764	1.727	1.731	1.792	1.772	1.738	1.77	1.755	1.833	1.811	1.745	1.762	1.771	1.651	1.622	1.743	1.753	1.715	1.732	1.801	1.849	1.664	1.554	1.78	1.785	1.577	1.567	1.386	1.375	1.752	1.754	1.763
21:39:03	1.671	1.748	1.868	1.88	1.099	1.211	1.879	1.869	1.884	1.843	1.791	1.854	1.828	1.861	1.825	1.693	1.781	1.764	1.726	1.73	1.794	1.775	1.739	1.771	1.756	1.835	1.811	1.746	1.764	1.771	1.652	1.621	1.743	1.751	1.715	1.733	1.802	1.85	1.665	1.553	1.778	1.786	1.582	1.573	1.387	1.375	1.753	1.754	1.766
21:49:03	1.672	1.755	1.871	1.881	1.107	1.213	1.88	1.871	1.885	1.841	1.786	1.853	1.83	1.863	1.823	1.695	1.781	1.76	1.726	1.729	1.795	1.775	1.739	1.772	1.758	1.836	1.812	1.747	1.762	1.77	1.651	1.621	1.745	1.755	1.714	1.733	1.803	1.852	1.666	1.551	1.778	1.786	1.588	1.581	1.387	1.376	1.753	1.754	1.768
21:59:03	1.672	1.763	1.873	1.879	1.124	1.216	1.881	1.872	1.884	1.84	1.791	1.853	1.83	1.863	1.823	1.697	1.781	1.761	1.725	1.729	1.795	1.775	1.74	1.771	1.758	1.836	1.812	1.747	1.755	1.769	1.649	1.617	1.743	1.754	1.715	1.733	1.805	1.855	1.667	1.548	1.779	1.786	1.594	1.585	1.389	1.377	1.754	1.754	1.767
22:09:03	1.671	1.761	1.877	1.877	1.146	1.219	1.881	1.873	1.886	1.845	1.794	1.852	1.831	1.866	1.823	1.698	1.779	1.76	1.724	1.728	1.793	1.776	1.739	1.77	1.759	1.838	1.812	1.746	1.751	1.767	1.648	1.616	1.742	1.757	1.715	1.733	1.81	1.858	1.666	1.545	1.778	1.786	1.6	1.591	1.389	1.378	1.755	1.754	1.769
22:19:03	1.671	1.765	1.879	1.881	1.183	1.224	1.884	1.874	1.887	1.845	1.796	1.853	1.832	1.866	1.825	1.699	1.778	1.759	1.724	1.724	1.791	1.776	1.739	1.77	1.759	1.839	1.813	1.746	1.747	1.765	1.645	1.617	1.742	1.758	1.715	1.733	1.809	1.863	1.667	1.543	1.78	1.787	1.606	1.597	1.39	1.379	1.756	1.755	1.769
22:29:03	1.669	1.769	1.88	1.88	1.242	1.233	1.885	1.875	1.887	1.848	1.793	1.854	1.833	1.867	1.824	1.702	1.776	1.754	1.721	1.724	1.792	1.779	1.74	1.769	1.759	1.839	1.813	1.748	1.742	1.764	1.645	1.614	1.743	1.759	1.715	1.734	1.811	1.863	1.665	1.539	1.78	1.785	1.611	1.603	1.391	1.379	1.756	1.753	1.768
22:39:03	1.67	1.776	1.88	1.88	1.283	1.238	1.887	1.876	1.888	1.847	1.801	1.855	1.835	1.865	1.825	1.705	1.774	1.757	1.722	1.726	1.795	1.779	1.74	1.768	1.76	1.843	1.813	1.747	1.739	1.764	1.644	1.612	1.745	1.761	1.715	1.734	1.815	1.867	1.665	1.538	1.78	1.786	1.618	1.61	1.392	1.38	1.755	1.753	1.768
22:49:03	1.672	1.768	1.882	1.884	1.326	1.246	1.889	1.878	1.89	1.848	1.811	1.859	1.838	1.868	1.824	1.708	1.776	1.754	1.722	1.726	1.797	1.78	1.741	1.768	1.762	1.844	1.813	1.747	1.737	1.763	1.645	1.61	1.748	1.762	1.716	1.735	1.817	1.868	1.666	1.539	1.78	1.786	1.625	1.614	1.392	1.381	1.758	1.756	1.77
22:59:03	1.673	1.771	1.878	1.883	1.386	1.277	1.891	1.879	1.891	1.85	1.816	1.861	1.838	1.869	1.823	1.708	1.774	1.756	1.72	1.727	1.799	1.78	1.74	1.766	1.763	1.842	1.813	1.749	1.734	1.761	1.643	1.608	1.749	1.763	1.717	1.735	1.817	1.871	1.664	1.537	1.779	1.785	1.632	1.621	1.393	1.382	1.758	1.758	1.77
23:09:03	1.675	1.777	1.882	1.885	1.44	1.286	1.893	1.881	1.892	1.85	1.813	1.861	1.838	1.872	1.824	1.713	1.776	1.755	1.718	1.725	1.801	1.779	1.741	1.765	1.764	1.845	1.815	1.748	1.735	1.758	1.643	1.608	1.75	1.764	1.717	1.737	1.818	1.873	1.665	1.533	1.779	1.785	1.638	1.627	1.394	1.383	1.76	1.759	1.772
23:19:03	1.676	1.778	1.882	1.885	1.488	1.301	1.894	1.882	1.892	1.852	1.818	1.862	1.839	1.871	1.824	1.713	1.772	1.751	1.719	1.722	1.804	1.779	1.741	1.764	1.764	1.843	1.817	1.749	1.731	1.756	1.642	1.604	1.751	1.765	1.719	1.738	1.819	1.874	1.663	1.531	1.778	1.784	1.644	1.632	1.395	1.383	1.759	1.76	1.773
23:29:03	1.679	1.777	1.884	1.885	1.522	1.317	1.896	1.884	1.894	1.853	1.825	1.866	1.84	1.871	1.825	1.72	1.771	1.753	1.716	1.722	1.807	1.783	1.742	1.764	1.766	1.842	1.818	1.751	1.73	1.756	1.641	1.606	1.75	1.765	1.72	1.737	1.82	1.874	1.664	1.529	1.778	1.785	1.65	1.638	1.395	1.384	1.761	1.76	1.772
23:39:03	1.682	1.776	1.887	1.886	1.545	1.332	1.899	1.885	1.895	1.854	1.836	1.867	1.841	1.875	1.825	1.721	1.771	1.752	1.716	1.722	1.81	1.783	1.744	1.763	1.767	1.847	1.819	1.753	1.723	1.757	1.641	1.606	1.753	1.766	1.722	1.738	1.821	1.877	1.665	1.529	1.778	1.786	1.655	1.642	1.396	1.383	1.763	1.763	1.772
23:49:03	1.682	1.774	1.886	1.886	1.562	1.366	1.9	1.886	1.895	1.856	1.838	1.869	1.841	1.875	1.824	1.726	1.773	1.753	1.716	1.722	1.809	1.783	1.743	1.763	1.767	1.846	1.819	1.753	1.717	1.757	1.641	1.604	1.754	1.767	1.723	1.738	1.824	1.883	1.663	1.529	1.778	1.784	1.662	1.647	1.396	1.385	1.763	1.764	1.771
23:59:03	1.683	1.781	1.888	1.885	1.579	1.389	1.901	1.888	1.895	1.859	1.843	1.871	1.842	1.874	1.824	1.729	1.77	1.749	1.716	1.722	1.812	1.788	1.745	1.764	1.769	1.85	1.819	1.754	1.715	1.758	1.641	1.603	1.756	1.769	1.724	1.739	1.828	1.885	1.663	1.527	1.779	1.785	1.668	1.653	1.397	1.386	1.765	1.767	1.773
1 day, 0:09:03	1.684	1.782	1.89	1.885	1.593	1.418	1.903	1.89	1.896	1.861	1.848	1.872	1.841	1.875	1.823	1.73	1.77	1.749	1.716	1.722	1.814	1.791	1.747	1.764	1.771	1.85	1.82	1.754	1.71	1.758	1.641	1.603	1.758	1.77	1.725	1.74	1.831	1.885	1.664	1.525	1.776	1.786	1.673	1.658	1.398	1.386	1.766	1.767	1.773
[truncated: 35 more columns]

## Sheet: NRS384-va8
Time	NRS384	NRS384-2	NRS384-8.1	NRS384-8.1-2	NRS384-8.2	NRS384-8.2-2	NRS384-8.3	NRS384-8.3-2	NRS384-8.4	NRS384-8.4-2	NRS384-8.5	NRS384-8.5-2	NRS384-8.6	NRS384-8.6-2	NRS384-8.7	NRS384-8.7-2	NRS384-8.8	NRS384-8.8-2	NRS384-8.9	NRS384-8.9-2	NRS384-8.10	NRS384-8.10-2	NRS384-8.11	NRS384-8.11-2	NRS384-8.12	NRS384-8.12-2	NRS384-8.13	NRS384-8.13-2	NRS384-8.14	NRS384-8.14-2	NRS384-8.15	NRS384-8.15-2	NRS384-8.16	NRS384-8.16-2	NRS384-8.17	NRS384-8.17-2	NRS384-8.18	NRS384-8.18-2	NRS384-8.19	NRS384-8.19-2	NRS384-8.20	NRS384-8.20-2	NRS384-8.21	NRS384-8.21-2	NRS384-8.22	NRS384-8.22-2	NRS384-8.23	NRS384-8.23-2	NRS384-8.24
00:00:00	0.095	0.094	0.097	0.096	0.095	0.095	0.097	0.098	0.097	0.096	0.093	0.094	0.095	0.093	0.095	0.095	0.094	0.094	0.093	0.094	0.097	0.094	0.092	0.093	0.092	0.094	0.092	0.094	0.094	0.092	0.094	0.094	0.093	0.093	0.093	0.093	0.093	0.092	0.097	0.092	0.092	0.095	0.094	0.092	0.092	0.093	0.091	0.092	0.092
00:09:22	0.096	0.095	0.098	0.096	0.095	0.095	0.096	0.097	0.097	0.097	0.094	0.096	0.095	0.093	0.095	0.095	0.094	0.094	0.092	0.094	0.096	0.094	0.092	0.093	0.092	0.094	0.092	0.094	0.094	0.092	0.094	0.094	0.093	0.093	0.093	0.093	0.092	0.092	0.097	0.093	0.092	0.096	0.094	0.093	0.092	0.093	0.091	0.092	0.093
00:19:22	0.096	0.095	0.098	0.096	0.095	0.095	0.097	0.097	0.097	0.096	0.094	0.095	0.095	0.093	0.095	0.096	0.094	0.094	0.093	0.095	0.096	0.094	0.093	0.093	0.093	0.094	0.092	0.094	0.094	0.092	0.094	0.094	0.093	0.093	0.093	0.093	0.092	0.092	0.097	0.093	0.092	0.096	0.094	0.093	0.092	0.093	0.091	0.092	0.093
00:29:22	0.096	0.095	0.098	0.096	0.095	0.095	0.096	0.097	0.097	0.097	0.094	0.096	0.095	0.093	0.095	0.095	0.094	0.093	0.093	0.095	0.096	0.094	0.093	0.093	0.092	0.094	0.092	0.094	0.093	0.092	0.094	0.094	0.093	0.093	0.093	0.093	0.092	0.092	0.097	0.092	0.092	0.095	0.094	0.093	0.092	0.093	0.091	0.092	0.093
00:39:22	0.096	0.095	0.097	0.096	0.095	0.095	0.096	0.098	0.097	0.097	0.093	0.095	0.095	0.092	0.095	0.095	0.094	0.094	0.092	0.095	0.096	0.094	0.093	0.093	0.092	0.094	0.092	0.094	0.093	0.092	0.093	0.094	0.093	0.092	0.093	0.093	0.092	0.092	0.097	0.092	0.092	0.095	0.094	0.093	0.092	0.092	0.091	0.092	0.093
00:49:22	0.096	0.095	0.098	0.096	0.095	0.095	0.097	0.097	0.097	0.096	0.094	0.095	0.095	0.093	0.095	0.096	0.094	0.094	0.093	0.095	0.096	0.095	0.093	0.093	0.092	0.094	0.092	0.094	0.093	0.092	0.094	0.095	0.093	0.093	0.093	0.092	0.092	0.092	0.097	0.093	0.092	0.096	0.095	0.093	0.092	0.093	0.092	0.092	0.093
00:59:22	0.098	0.095	0.098	0.096	0.095	0.095	0.096	0.097	0.097	0.096	0.093	0.095	0.095	0.093	0.095	0.095	0.094	0.094	0.093	0.095	0.096	0.094	0.092	0.093	0.092	0.094	0.092	0.094	0.093	0.092	0.094	0.094	0.093	0.093	0.093	0.092	0.092	0.092	0.096	0.092	0.092	0.096	0.094	0.093	0.092	0.093	0.091	0.092	0.093
01:09:22	0.097	0.095	0.098	0.096	0.095	0.095	0.096	0.097	0.097	0.096	0.094	0.095	0.096	0.093	0.096	0.095	0.094	0.094	0.093	0.095	0.097	0.095	0.092	0.094	0.093	0.095	0.092	0.094	0.094	0.092	0.094	0.094	0.093	0.093	0.093	0.093	0.093	0.092	0.097	0.092	0.092	0.096	0.094	0.093	0.092	0.093	0.091	0.092	0.094
01:19:22	0.1	0.096	0.098	0.096	0.095	0.095	0.096	0.097	0.097	0.097	0.094	0.096	0.095	0.093	0.096	0.096	0.094	0.093	0.093	0.095	0.097	0.095	0.093	0.094	0.093	0.095	0.093	0.094	0.094	0.092	0.094	0.094	0.094	0.093	0.093	0.093	0.092	0.093	0.097	0.093	0.092	0.097	0.095	0.093	0.092	0.093	0.092	0.092	0.094
01:29:22	0.1	0.096	0.098	0.096	0.095	0.095	0.096	0.098	0.097	0.097	0.094	0.096	0.096	0.094	0.096	0.096	0.095	0.094	0.093	0.095	0.097	0.095	0.093	0.094	0.093	0.095	0.093	0.094	0.093	0.093	0.094	0.094	0.094	0.093	0.093	0.093	0.093	0.093	0.097	0.093	0.092	0.097	0.095	0.093	0.092	0.093	0.092	0.093	0.094
01:39:22	0.1	0.097	0.098	0.097	0.095	0.095	0.097	0.098	0.097	0.097	0.094	0.096	0.096	0.094	0.096	0.096	0.095	0.094	0.093	0.096	0.098	0.096	0.093	0.094	0.094	0.096	0.093	0.094	0.094	0.093	0.094	0.095	0.094	0.093	0.093	0.093	0.093	0.093	0.097	0.093	0.092	0.096	0.095	0.093	0.092	0.093	0.092	0.093	0.094
01:49:22	0.102	0.098	0.099	0.097	0.095	0.095	0.097	0.098	0.097	0.097	0.094	0.097	0.097	0.094	0.096	0.097	0.095	0.094	0.093	0.096	0.098	0.096	0.094	0.094	0.094	0.096	0.093	0.094	0.094	0.093	0.094	0.094	0.094	0.093	0.093	0.093	0.093	0.093	0.098	0.093	0.092	0.097	0.095	0.094	0.092	0.093	0.093	0.094	0.095
01:59:22	0.101	0.099	0.099	0.097	0.095	0.095	0.097	0.098	0.097	0.097	0.094	0.098	0.097	0.094	0.096	0.097	0.095	0.094	0.093	0.096	0.099	0.096	0.093	0.094	0.094	0.096	0.093	0.094	0.094	0.093	0.094	0.094	0.094	0.093	0.093	0.093	0.094	0.093	0.098	0.093	0.092	0.097	0.096	0.094	0.092	0.093	0.093	0.094	0.096
02:09:22	0.103	0.1	0.099	0.097	0.095	0.095	0.097	0.098	0.098	0.097	0.095	0.103	0.097	0.095	0.097	0.097	0.096	0.095	0.094	0.096	0.099	0.097	0.094	0.094	0.095	0.097	0.093	0.094	0.094	0.093	0.094	0.095	0.094	0.094	0.094	0.094	0.094	0.094	0.098	0.093	0.092	0.097	0.096	0.094	0.092	0.093	0.094	0.095	0.096
02:19:22	0.104	0.102	0.099	0.097	0.095	0.096	0.097	0.098	0.098	0.097	0.095	0.099	0.098	0.095	0.097	0.097	0.096	0.095	0.094	0.097	0.1	0.097	0.093	0.094	0.096	0.098	0.094	0.095	0.094	0.093	0.094	0.095	0.095	0.094	0.094	0.094	0.095	0.094	0.098	0.093	0.092	0.097	0.096	0.094	0.092	0.094	0.094	0.096	0.097
02:29:22	0.106	0.105	0.098	0.097	0.095	0.095	0.098	0.099	0.098	0.097	0.095	0.101	0.099	0.096	0.097	0.098	0.096	0.096	0.094	0.097	0.101	0.098	0.094	0.093	0.097	0.099	0.094	0.095	0.094	0.094	0.094	0.095	0.095	0.094	0.094	0.094	0.096	0.095	0.098	0.093	0.093	0.097	0.096	0.095	0.093	0.094	0.095	0.097	0.098
02:39:22	0.11	0.109	0.099	0.097	0.095	0.096	0.098	0.099	0.098	0.098	0.096	0.101	0.099	0.096	0.098	0.098	0.097	0.095	0.094	0.098	0.102	0.099	0.094	0.094	0.099	0.1	0.094	0.095	0.094	0.094	0.095	0.095	0.096	0.094	0.094	0.094	0.095	0.096	0.099	0.093	0.092	0.097	0.097	0.095	0.093	0.093	0.096	0.099	0.1
02:49:22	0.115	0.114	0.099	0.097	0.095	0.096	0.098	0.099	0.098	0.099	0.096	0.102	0.099	0.097	0.099	0.099	0.097	0.096	0.095	0.098	0.102	0.099	0.094	0.094	0.1	0.101	0.095	0.095	0.095	0.094	0.095	0.095	0.096	0.095	0.094	0.095	0.096	0.096	0.099	0.093	0.093	0.097	0.097	0.095	0.093	0.094	0.098	0.101	0.101
02:59:22	0.125	0.123	0.099	0.097	0.095	0.096	0.098	0.1	0.099	0.099	0.097	0.107	0.1	0.098	0.099	0.1	0.098	0.096	0.095	0.099	0.103	0.1	0.094	0.094	0.103	0.103	0.095	0.096	0.095	0.095	0.095	0.095	0.097	0.095	0.095	0.095	0.098	0.097	0.1	0.094	0.093	0.097	0.098	0.095	0.093	0.094	0.1	0.104	0.103
03:09:22	0.134	0.134	0.099	0.098	0.095	0.096	0.098	0.1	0.099	0.1	0.097	0.104	0.101	0.098	0.1	0.1	0.099	0.097	0.095	0.1	0.105	0.102	0.094	0.094	0.105	0.105	0.096	0.096	0.095	0.096	0.096	0.095	0.098	0.096	0.095	0.096	0.099	0.099	0.1	0.094	0.093	0.097	0.098	0.096	0.093	0.094	0.103	0.108	0.107
03:19:22	0.148	0.148	0.099	0.098	0.095	0.096	0.099	0.101	0.099	0.1	0.098	0.106	0.102	0.099	0.101	0.101	0.101	0.098	0.096	0.101	0.106	0.102	0.094	0.094	0.109	0.108	0.097	0.097	0.096	0.096	0.096	0.095	0.099	0.097	0.096	0.097	0.1	0.1	0.1	0.094	0.093	0.097	0.099	0.097	0.094	0.094	0.106	0.113	0.111
03:29:22	0.166	0.167	0.1	0.098	0.095	0.096	0.099	0.102	0.1	0.101	0.099	0.109	0.103	0.101	0.103	0.102	0.102	0.099	0.096	0.103	0.109	0.104	0.095	0.095	0.113	0.112	0.098	0.097	0.097	0.097	0.096	0.096	0.1	0.097	0.097	0.098	0.102	0.102	0.101	0.094	0.093	0.097	0.1	0.098	0.094	0.095	0.111	0.12	0.115
03:39:22	0.188	0.192	0.1	0.098	0.095	0.096	0.1	0.103	0.101	0.102	0.1	0.113	0.104	0.102	0.104	0.104	0.104	0.1	0.097	0.104	0.111	0.106	0.095	0.095	0.119	0.116	0.099	0.098	0.097	0.099	0.096	0.096	0.101	0.098	0.098	0.099	0.105	0.105	0.102	0.095	0.093	0.097	0.101	0.098	0.094	0.095	0.117	0.129	0.122
03:49:22	0.215	0.221	0.1	0.098	0.095	0.097	0.1	0.104	0.101	0.103	0.102	0.116	0.106	0.103	0.106	0.105	0.106	0.102	0.098	0.106	0.114	0.108	0.095	0.095	0.125	0.122	0.101	0.099	0.098	0.1	0.097	0.096	0.103	0.1	0.099	0.1	0.108	0.109	0.102	0.095	0.093	0.097	0.102	0.099	0.095	0.096	0.126	0.142	0.131
03:59:22	0.252	0.26	0.1	0.098	0.096	0.097	0.102	0.106	0.103	0.105	0.105	0.122	0.108	0.106	0.109	0.107	0.109	0.104	0.099	0.108	0.117	0.111	0.095	0.096	0.133	0.127	0.103	0.101	0.099	0.102	0.098	0.096	0.106	0.101	0.1	0.103	0.112	0.114	0.103	0.096	0.094	0.097	0.104	0.101	0.096	0.097	0.138	0.157	0.143
04:09:22	0.297	0.304	0.101	0.099	0.095	0.097	0.103	0.109	0.104	0.107	0.107	0.129	0.111	0.109	0.112	0.11	0.113	0.106	0.1	0.111	0.121	0.115	0.095	0.096	0.142	0.134	0.106	0.103	0.1	0.105	0.098	0.097	0.109	0.103	0.102	0.106	0.118	0.119	0.105	0.096	0.094	0.097	0.106	0.103	0.097	0.097	0.151	0.175	0.157
04:19:22	0.348	0.355	0.101	0.099	0.095	0.098	0.104	0.112	0.105	0.11	0.111	0.137	0.114	0.112	0.116	0.113	0.116	0.109	0.102	0.114	0.127	0.119	0.096	0.097	0.152	0.142	0.109	0.105	0.102	0.108	0.1	0.097	0.113	0.105	0.105	0.11	0.126	0.127	0.106	0.097	0.094	0.098	0.109	0.105	0.098	0.098	0.169	0.199	0.173
04:29:22	0.403	0.412	0.101	0.099	0.096	0.098	0.106	0.115	0.107	0.113	0.115	0.149	0.119	0.117	0.12	0.116	0.12	0.112	0.104	0.118	0.132	0.124	0.096	0.097	0.163	0.15	0.113	0.108	0.104	0.111	0.101	0.098	0.118	0.108	0.108	0.116	0.135	0.136	0.108	0.097	0.094	0.098	0.112	0.107	0.099	0.1	0.188	0.224	0.192
04:39:22	0.468	0.48	0.101	0.099	0.096	0.098	0.109	0.121	0.11	0.116	0.121	0.163	0.124	0.123	0.125	0.121	0.126	0.116	0.106	0.122	0.14	0.13	0.097	0.099	0.176	0.16	0.119	0.112	0.107	0.116	0.102	0.098	0.125	0.111	0.113	0.124	0.147	0.148	0.109	0.098	0.094	0.098	0.115	0.11	0.101	0.102	0.212	0.255	0.214
04:49:22	0.541	0.557	0.102	0.1	0.096	0.099	0.112	0.127	0.113	0.122	0.129	0.179	0.132	0.13	0.131	0.125	0.132	0.12	0.109	0.128	0.149	0.137	0.098	0.1	0.191	0.17	0.125	0.117	0.111	0.121	0.104	0.099	0.133	0.116	0.118	0.134	0.161	0.163	0.112	0.099	0.095	0.098	0.12	0.114	0.103	0.104	0.237	0.288	0.239
04:59:22	0.617	0.633	0.102	0.1	0.096	0.1	0.116	0.135	0.117	0.128	0.137	0.198	0.141	0.138	0.138	0.131	0.139	0.125	0.112	0.133	0.159	0.145	0.098	0.101	0.207	0.181	0.132	0.122	0.115	0.129	0.106	0.1	0.143	0.121	0.125	0.147	0.178	0.18	0.115	0.1	0.095	0.098	0.125	0.118	0.106	0.107	0.266	0.325	0.266
05:09:22	0.69	0.708	0.102	0.1	0.096	0.101	0.121	0.145	0.121	0.137	0.149	0.221	0.153	0.148	0.146	0.137	0.147	0.132	0.115	0.141	0.172	0.156	0.1	0.103	0.224	0.193	0.141	0.13	0.12	0.137	0.109	0.101	0.155	0.128	0.135	0.164	0.199	0.199	0.118	0.102	0.095	0.098	0.133	0.124	0.109	0.111	0.298	0.364	0.296
05:19:22	0.768	0.79	0.102	0.1	0.096	0.102	0.128	0.157	0.127	0.147	0.163	0.245	0.166	0.161	0.154	0.145	0.157	0.139	0.12	0.149	0.186	0.168	0.101	0.106	0.241	0.204	0.151	0.138	0.127	0.146	0.113	0.102	0.169	0.136	0.146	0.185	0.222	0.223	0.122	0.103	0.095	0.098	0.14	0.13	0.114	0.116	0.332	0.406	0.329
05:29:22	0.854	0.872	0.103	0.101	0.096	0.104	0.137	0.173	0.135	0.159	0.178	0.273	0.183	0.174	0.164	0.153	0.168	0.147	0.125	0.158	0.202	0.184	0.103	0.109	0.26	0.218	0.162	0.149	0.135	0.156	0.118	0.104	0.185	0.146	0.161	0.209	0.251	0.251	0.128	0.106	0.095	0.099	0.149	0.138	0.12	0.122	0.37	0.45	0.365
05:39:22	0.926	0.936	0.103	0.101	0.096	0.107	0.146	0.19	0.143	0.174	0.197	0.301	0.202	0.19	0.175	0.164	0.18	0.157	0.131	0.169	0.219	0.2	0.105	0.113	0.281	0.231	0.173	0.161	0.144	0.168	0.123	0.106	0.203	0.159	0.179	0.234	0.284	0.284	0.134	0.108	0.096	0.099	0.159	0.147	0.127	0.13	0.41	0.497	0.401
05:49:22	0.981	0.982	0.104	0.102	0.097	0.11	0.16	0.211	0.155	0.192	0.218	0.333	0.224	0.207	0.187	0.174	0.193	0.168	0.139	0.181	0.238	0.218	0.108	0.119	0.304	0.247	0.186	0.174	0.155	0.179	0.13	0.11	0.224	0.173	0.199	0.263	0.325	0.323	0.141	0.112	0.097	0.1	0.171	0.157	0.137	0.14	0.452	0.546	0.437
05:59:22	1.026	1.02	0.105	0.103	0.097	0.114	0.175	0.234	0.167	0.211	0.239	0.366	0.249	0.226	0.199	0.186	0.207	0.18	0.147	0.193	0.258	0.237	0.111	0.125	0.328	0.263	0.199	0.189	0.166	0.192	0.139	0.113	0.248	0.188	0.221	0.292	0.373	0.367	0.149	0.116	0.097	0.1	0.182	0.168	0.148	0.152	0.494	0.596	0.474
06:09:22	1.069	1.055	0.106	0.103	0.097	0.118	0.192	0.26	0.183	0.233	0.262	0.402	0.276	0.247	0.213	0.198	0.221	0.193	0.156	0.206	0.279	0.258	0.115	0.133	0.354	0.28	0.214	0.204	0.177	0.204	0.148	0.117	0.273	0.206	0.247	0.325	0.427	0.417	0.158	0.12	0.097	0.1	0.195	0.18	0.161	0.166	0.538	0.647	0.508
06:19:22	1.103	1.08	0.106	0.104	0.097	0.124	0.212	0.29	0.2	0.257	0.286	0.438	0.306	0.269	0.228	0.212	0.236	0.206	0.166	0.22	0.301	0.279	0.121	0.142	0.381	0.299	0.229	0.22	0.189	0.218	0.159	0.123	0.303	0.226	0.274	0.358	0.487	0.47	0.169	0.126	0.098	0.1	0.21	0.193	0.177	0.183	0.582	0.7	0.544
06:29:22	1.137	1.099	0.107	0.105	0.098	0.132	0.236	0.323	0.22	0.283	0.313	0.477	0.338	0.291	0.243	0.227	0.252	0.22	0.178	0.234	0.324	0.303	0.127	0.154	0.41	0.318	0.245	0.238	0.202	0.232	0.171	0.129	0.335	0.249	0.304	0.393	0.552	0.524	0.18	0.133	0.099	0.101	0.226	0.208	0.194	0.201	0.626	0.754	0.579
06:39:22	1.165	1.118	0.108	0.106	0.099	0.141	0.264	0.357	0.241	0.309	0.343	0.517	0.371	0.316	0.26	0.243	0.269	0.235	0.19	0.25	0.349	0.327	0.135	0.167	0.444	0.34	0.263	0.256	0.215	0.245	0.184	0.136	0.37	0.274	0.335	0.428	0.621	0.579	0.192	0.141	0.1	0.101	0.241	0.225	0.214	0.222	0.677	0.813	0.614
06:49:22	1.189	1.137	0.11	0.107	0.099	0.152	0.295	0.394	0.263	0.335	0.373	0.556	0.406	0.341	0.277	0.259	0.287	0.251	0.203	0.265	0.375	0.352	0.144	0.182	0.479	0.365	0.283	0.275	0.228	0.259	0.198	0.146	0.41	0.302	0.37	0.463	0.703	0.632	0.204	0.15	0.101	0.102	0.259	0.242	0.235	0.243	0.732	0.858	0.651
06:59:22	1.202	1.153	0.111	0.108	0.1	0.165	0.328	0.433	0.286	0.365	0.406	0.598	0.441	0.368	0.296	0.276	0.304	0.267	0.217	0.28	0.403	0.379	0.154	0.199	0.523	0.391	0.303	0.295	0.242	0.274	0.211	0.156	0.452	0.334	0.407	0.501	0.776	0.679	0.217	0.16	0.101	0.103	0.278	0.261	0.258	0.269	0.783	0.907	0.689
07:09:22	1.214	1.161	0.113	0.11	0.102	0.181	0.363	0.47	0.31	0.394	0.44	0.64	0.477	0.395	0.315	0.295	0.323	0.284	0.231	0.297	0.432	0.407	0.167	0.218	0.566	0.419	0.325	0.317	0.256	0.288	0.225	0.167	0.496	0.37	0.443	0.54	0.85	0.723	0.231	0.172	0.103	0.104	0.299	0.281	0.284	0.294	0.826	0.956	0.724
07:19:22	1.223	1.168	0.114	0.111	0.103	0.198	0.401	0.508	0.335	0.424	0.476	0.686	0.513	0.423	0.336	0.315	0.342	0.302	0.246	0.315	0.464	0.436	0.18	0.238	0.613	0.451	0.348	0.339	0.27	0.304	0.24	0.18	0.541	0.411	0.48	0.576	0.919	0.775	0.247	0.184	0.104	0.105	0.321	0.304	0.31	0.322	0.87	1	0.755
07:29:22	1.234	1.178	0.116	0.113	0.105	0.218	0.439	0.544	0.362	0.454	0.511	0.731	0.548	0.452	0.358	0.335	0.362	0.321	0.261	0.333	0.496	0.468	0.195	0.26	0.665	0.486	0.371	0.362	0.284	0.32	0.254	0.193	0.588	0.455	0.519	0.614	0.981	0.827	0.264	0.197	0.105	0.106	0.343	0.327	0.338	0.351	0.908	1.044	0.788
07:39:22	1.244	1.185	0.118	0.115	0.108	0.239	0.477	0.584	0.388	0.485	0.548	0.777	0.584	0.479	0.381	0.358	0.382	0.339	0.277	0.352	0.528	0.499	0.211	0.284	0.714	0.523	0.395	0.387	0.299	0.337	0.268	0.206	0.637	0.5	0.56	0.656	1.024	0.888	0.282	0.211	0.107	0.107	0.366	0.352	0.367	0.38	0.95	1.079	0.818
07:49:22	1.251	1.192	0.121	0.118	0.111	0.261	0.515	0.621	0.416	0.517	0.585	0.827	0.618	0.509	0.406	0.382	0.403	0.359	0.294	0.372	0.562	0.535	0.23	0.309	0.765	0.564	0.42	0.41	0.315	0.352	0.283	0.219	0.689	0.546	0.596	0.704	1.056	0.936	0.302	0.226	0.109	0.108	0.39	0.38	0.398	0.411	0.992	1.116	0.843
07:59:22	1.261	1.2	0.124	0.121	0.115	0.286	0.55	0.663	0.445	0.547	0.627	0.874	0.654	0.537	0.431	0.407	0.425	0.379	0.312	0.391	0.596	0.571	0.249	0.335	0.823	0.605	0.445	0.435	0.332	0.37	0.298	0.233	0.738	0.598	0.637	0.748	1.114	0.979	0.324	0.243	0.112	0.11	0.413	0.406	0.43	0.443	1.03	1.148	0.862
08:09:22	1.268	1.206	0.127	0.124	0.121	0.311	0.591	0.703	0.474	0.578	0.668	0.925	0.689	0.565	0.458	0.433	0.448	0.4	0.331	0.412	0.633	0.606	0.27	0.364	0.881	0.647	0.47	0.459	0.348	0.387	0.314	0.246	0.783	0.65	0.68	0.799	1.135	1.02	0.347	0.261	0.114	0.111	0.437	0.433	0.463	0.475	1.057	1.17	0.885
08:19:22	1.27	1.213	0.131	0.128	0.128	0.338	0.63	0.742	0.505	0.609	0.707	0.976	0.719	0.593	0.484	0.459	0.471	0.422	0.35	0.433	0.67	0.645	0.293	0.393	0.933	0.691	0.498	0.483	0.365	0.407	0.33	0.26	0.818	0.697	0.724	0.847	1.192	1.051	0.373	0.28	0.117	0.113	0.462	0.461	0.497	0.508	1.094	1.199	0.906
08:29:22	1.279	1.218	0.135	0.132	0.136	0.366	0.669	0.781	0.534	0.638	0.746	1.023	0.755	0.622	0.511	0.486	0.496	0.444	0.37	0.454	0.709	0.687	0.318	0.424	0.989	0.736	0.522	0.508	0.384	0.424	0.347	0.273	0.87	0.744	0.769	0.893	1.217	1.079	0.4	0.301	0.12	0.115	0.488	0.49	0.529	0.54	1.117	1.219	0.932
08:39:22	1.291	1.226	0.14	0.136	0.145	0.395	0.706	0.823	0.564	0.667	0.789	1.068	0.784	0.648	0.538	0.514	0.52	0.467	0.39	0.475	0.751	0.729	0.342	0.456	1.041	0.778	0.551	0.534	0.403	0.444	0.363	0.287	0.912	0.791	0.815	0.943	1.238	1.11	0.429	0.324	0.124	0.118	0.515	0.52	0.561	0.573	1.142	1.24	0.956
08:49:22	1.3	1.227	0.145	0.142	0.157	0.426	0.747	0.86	0.593	0.696	0.83	1.113	0.82	0.676	0.566	0.541	0.546	0.49	0.412	0.496	0.789	0.77	0.37	0.488	1.093	0.827	0.578	0.559	0.422	0.466	0.38	0.301	0.95	0.831	0.86	0.989	1.256	1.133	0.46	0.346	0.128	0.121	0.544	0.55	0.594	0.605	1.165	1.256	0.979
08:59:22	1.301	1.234	0.152	0.148	0.17	0.456	0.79	0.897	0.621	0.724	0.868	1.154	0.854	0.705	0.592	0.57	0.572	0.514	0.434	0.517	0.829	0.813	0.399	0.523	1.13	0.871	0.608	0.584	0.44	0.486	0.4	0.315	0.993	0.879	0.898	1.036	1.277	1.156	0.496	0.372	0.133	0.124	0.572	0.583	0.626	0.637	1.182	1.27	0.998
09:09:22	1.301	1.239	0.159	0.155	0.185	0.49	0.83	0.937	0.65	0.752	0.911	1.198	0.877	0.731	0.619	0.599	0.598	0.538	0.456	0.54	0.866	0.857	0.43	0.558	1.166	0.914	0.639	0.615	0.463	0.508	0.417	0.33	1.026	0.92	0.937	1.077	1.283	1.174	0.532	0.397	0.138	0.128	0.6	0.612	0.658	0.67	1.202	1.286	1.013
09:19:22	1.306	1.245	0.168	0.164	0.203	0.521	0.871	0.975	0.678	0.778	0.953	1.235	0.908	0.756	0.644	0.625	0.624	0.564	0.479	0.561	0.903	0.899	0.46	0.593	1.192	0.95	0.664	0.644	0.481	0.532	0.437	0.344	1.056	0.951	0.974	1.117	1.3	1.19	0.572	0.43	0.143	0.132	0.628	0.64	0.69	0.701	1.218	1.298	1.033
09:29:22	1.307	1.252	0.177	0.173	0.221	0.555	0.915	1.014	0.704	0.802	0.991	1.269	0.946	0.782	0.668	0.653	0.651	0.588	0.501	0.584	0.936	0.937	0.493	0.626	1.21	0.984	0.694	0.673	0.502	0.561	0.458	0.36	1.077	0.99	1.013	1.152	1.312	1.208	0.611	0.466	0.149	0.136	0.653	0.671	0.722	0.73	1.236	1.308	1.051
09:39:22	1.308	1.254	0.187	0.183	0.24	0.589	0.953	1.046	0.728	0.826	1.027	1.303	0.978	0.812	0.692	0.679	0.676	0.614	0.524	0.608	0.965	0.972	0.527	0.659	1.24	1.016	0.721	0.705	0.528	0.588	0.477	0.376	1.109	1.018	1.045	1.182	1.322	1.22	0.652	0.507	0.156	0.14	0.681	0.702	0.752	0.76	1.246	1.314	1.064
09:49:22	1.318	1.262	0.198	0.194	0.261	0.625	0.987	1.076	0.753	0.848	1.066	1.332	1.005	0.84	0.715	0.705	0.702	0.639	0.547	0.632	0.992	1.005	0.561	0.695	1.262	1.049	0.75	0.735	0.552	0.616	0.499	0.392	1.138	1.053	1.078	1.216	1.321	1.232	0.696	0.55	0.163	0.146	0.712	0.726	0.78	0.789	1.255	1.321	1.078
09:59:22	1.317	1.263	0.21	0.206	0.282	0.659	1.024	1.104	0.778	0.869	1.098	1.359	1.032	0.867	0.736	0.73	0.728	0.666	0.571	0.657	1.013	1.035	0.596	0.73	1.277	1.077	0.777	0.763	0.579	0.646	0.522	0.409	1.157	1.072	1.104	1.246	1.335	1.241	0.739	0.59	0.171	0.152	0.744	0.758	0.81	0.817	1.268	1.327	1.092
10:09:22	1.321	1.267	0.224	0.22	0.305	0.696	1.059	1.129	0.8	0.891	1.135	1.389	1.054	0.89	0.755	0.752	0.753	0.691	0.594	0.68	1.03	1.057	0.629	0.765	1.295	1.107	0.807	0.788	0.606	0.677	0.546	0.426	1.171	1.089	1.131	1.269	1.335	1.249	0.795	0.622	0.179	0.158	0.773	0.783	0.837	0.846	1.275	1.335	1.105
10:19:22	1.327	1.276	0.239	0.235	0.328	0.731	1.087	1.153	0.822	0.911	1.166	1.411	1.073	0.91	0.774	0.773	0.777	0.716	0.62	0.699	1.048	1.077	0.662	0.799	1.309	1.129	0.837	0.814	0.64	0.707	0.572	0.443	1.184	1.113	1.154	1.289	1.342	1.257	0.841	0.656	0.188	0.165	0.8	0.811	0.864	0.871	1.281	1.347	1.115
10:29:22	1.331	1.276	0.256	0.252	0.352	0.764	1.118	1.174	0.843	0.93	1.195	1.432	1.09	0.929	0.793	0.795	0.802	0.74	0.646	0.711	1.059	1.092	0.697	0.832	1.318	1.148	0.863	0.839	0.668	0.737	0.599	0.462	1.2	1.133	1.177	1.315	1.337	1.261	0.886	0.693	0.198	0.172	0.826	0.839	0.889	0.895	1.29	1.356	1.128
10:39:22	1.335	1.284	0.275	0.27	0.378	0.796	1.143	1.202	0.861	0.951	1.223	1.45	1.109	0.945	0.81	0.816	0.825	0.765	0.673	0.728	1.072	1.109	0.732	0.864	1.324	1.167	0.89	0.861	0.699	0.765	0.627	0.48	1.21	1.153	1.198	1.329	1.341	1.263	0.928	0.74	0.209	0.18	0.852	0.862	0.912	0.92	1.3	1.365	1.139
10:49:22	1.342	1.288	0.295	0.29	0.405	0.827	1.169	1.22	0.882	0.972	1.246	1.465	1.124	0.955	0.827	0.836	0.849	0.789	0.698	0.748	1.082	1.122	0.765	0.895	1.33	1.184	0.915	0.885	0.727	0.794	0.654	0.499	1.222	1.173	1.215	1.346	1.341	1.263	0.959	0.789	0.222	0.189	0.879	0.881	0.937	0.944	1.306	1.376	1.148
10:59:22	1.344	1.289	0.317	0.312	0.431	0.858	1.192	1.243	0.903	0.991	1.27	1.482	1.142	0.969	0.844	0.854	0.872	0.813	0.725	0.767	1.095	1.131	0.798	0.924	1.334	1.194	0.936	0.908	0.761	0.818	0.686	0.519	1.232	1.195	1.233	1.364	1.338	1.271	0.996	0.844	0.235	0.198	0.903	0.905	0.957	0.965	1.315	1.387	1.158
11:09:22	1.343	1.291	0.341	0.334	0.46	0.886	1.214	1.261	0.923	1.004	1.289	1.491	1.159	0.987	0.86	0.872	0.894	0.835	0.741	0.788	1.102	1.145	0.832	0.95	1.339	1.208	0.958	0.929	0.786	0.844	0.713	0.54	1.244	1.21	1.251	1.376	1.333	1.272	1.027	0.895	0.25	0.209	0.925	0.927	0.976	0.985	1.325	1.397	1.166
11:19:22	1.348	1.295	0.368	0.358	0.49	0.913	1.234	1.277	0.943	1.016	1.307	1.5	1.173	1.002	0.876	0.892	0.914	0.857	0.754	0.805	1.113	1.156	0.861	0.973	1.341	1.22	0.975	0.951	0.818	0.87	0.747	0.561	1.253	1.226	1.267	1.389	1.339	1.274	1.054	0.943	0.266	0.22	0.946	0.949	0.994	1.001	1.336	1.409	1.173
11:29:22	1.345	1.296	0.397	0.382	0.521	0.937	1.253	1.29	0.96	1.027	1.321	1.518	1.185	1.017	0.892	0.912	0.936	0.879	0.775	0.826	1.111	1.161	0.889	0.991	1.343	1.231	0.992	0.97	0.846	0.89	0.782	0.583	1.259	1.239	1.28	1.398	1.336	1.277	1.08	0.981	0.284	0.232	0.963	0.963	1.007	1.017	1.346	1.419	1.181
11:39:22	1.347	1.307	0.428	0.409	0.553	0.964	1.27	1.305	0.976	1.038	1.341	1.524	1.194	1.033	0.908	0.928	0.957	0.901	0.795	0.845	1.125	1.171	0.918	1.013	1.347	1.242	1.009	0.99	0.867	0.917	0.818	0.609	1.267	1.249	1.295	1.41	1.337	1.279	1.105	1.031	0.303	0.246	0.979	0.981	1.023	1.032	1.357	1.431	1.188
11:49:22	1.356	1.307	0.462	0.436	0.584	0.982	1.285	1.315	0.987	1.049	1.354	1.533	1.206	1.047	0.923	0.944	0.975	0.921	0.812	0.862	1.134	1.182	0.944	1.029	1.348	1.247	1.03	1.007	0.903	0.949	0.858	0.633	1.275	1.261	1.306	1.419	1.343	1.277	1.131	1.076	0.325	0.26	0.992	0.996	1.036	1.047	1.368	1.444	1.194
11:59:22	1.354	1.309	0.502	0.465	0.618	1.004	1.296	1.326	0.997	1.06	1.369	1.543	1.21	1.059	0.939	0.961	0.994	0.942	0.831	0.879	1.145	1.192	0.965	1.043	1.35	1.252	1.047	1.027	0.931	0.965	0.894	0.658	1.282	1.27	1.319	1.429	1.337	1.277	1.156	1.107	0.347	0.276	1.003	1.01	1.049	1.057	1.378	1.455	1.198
12:09:22	1.363	1.311	0.545	0.494	0.658	1.022	1.309	1.331	1.009	1.07	1.378	1.548	1.217	1.068	0.952	0.978	1.012	0.96	0.852	0.895	1.148	1.205	0.987	1.057	1.355	1.258	1.059	1.046	0.953	0.991	0.925	0.684	1.291	1.28	1.329	1.437	1.337	1.278	1.172	1.138	0.371	0.293	1.018	1.019	1.059	1.068	1.389	1.464	1.203
12:19:22	1.358	1.315	0.593	0.526	0.686	1.047	1.317	1.338	1.02	1.08	1.391	1.554	1.221	1.076	0.966	0.992	1.03	0.98	0.867	0.911	1.169	1.213	1.006	1.067	1.359	1.261	1.069	1.069	0.975	1.009	0.959	0.709	1.296	1.287	1.338	1.446	1.337	1.282	1.189	1.165	0.395	0.311	1.029	1.028	1.068	1.078	1.4	1.476	1.207
12:29:22	1.361	1.315	0.646	0.564	0.722	1.063	1.327	1.348	1.03	1.089	1.4	1.561	1.227	1.085	0.978	1.007	1.046	0.997	0.887	0.926	1.177	1.221	1.022	1.072	1.359	1.266	1.08	1.082	0.999	1.03	0.989	0.737	1.302	1.295	1.347	1.456	1.337	1.286	1.212	1.19	0.42	0.331	1.04	1.039	1.078	1.088	1.409	1.488	1.213
12:39:22	1.371	1.318	0.697	0.602	0.754	1.082	1.337	1.355	1.039	1.099	1.408	1.562	1.234	1.094	0.991	1.02	1.062	1.014	0.907	0.938	1.191	1.232	1.034	1.081	1.363	1.272	1.087	1.099	1.02	1.049	1.021	0.766	1.306	1.301	1.355	1.465	1.338	1.284	1.232	1.209	0.445	0.35	1.051	1.047	1.087	1.095	1.421	1.494	1.216
12:49:22	1.371	1.322	0.748	0.642	0.784	1.099	1.347	1.363	1.049	1.106	1.415	1.566	1.239	1.099	1.002	1.034	1.079	1.031	0.923	0.953	1.202	1.241	1.048	1.088	1.367	1.277	1.096	1.111	1.045	1.068	1.049	0.797	1.313	1.306	1.366	1.474	1.338	1.284	1.246	1.233	0.47	0.372	1.059	1.055	1.095	1.103	1.43	1.506	1.22
12:59:22	1.376	1.325	0.799	0.684	0.817	1.111	1.355	1.371	1.058	1.113	1.421	1.571	1.244	1.105	1.014	1.045	1.094	1.046	0.938	0.967	1.214	1.25	1.059	1.092	1.369	1.285	1.106	1.124	1.059	1.084	1.087	0.83	1.319	1.312	1.374	1.482	1.34	1.287	1.262	1.247	0.496	0.392	1.067	1.065	1.102	1.11	1.439	1.514	1.223
13:09:22	1.378	1.327	0.847	0.728	0.855	1.121	1.364	1.378	1.066	1.121	1.426	1.577	1.245	1.109	1.023	1.057	1.109	1.062	0.951	0.979	1.227	1.259	1.066	1.094	1.372	1.289	1.113	1.135	1.086	1.099	1.115	0.864	1.322	1.316	1.385	1.491	1.339	1.287	1.272	1.263	0.522	0.414	1.073	1.07	1.11	1.118	1.448	1.523	1.225
13:19:22	1.383	1.33	0.896	0.775	0.889	1.13	1.371	1.384	1.074	1.127	1.431	1.58	1.252	1.114	1.032	1.067	1.122	1.076	0.966	0.991	1.24	1.268	1.073	1.096	1.378	1.294	1.117	1.147	1.1	1.109	1.138	0.891	1.33	1.323	1.393	1.5	1.345	1.289	1.284	1.284	0.55	0.435	1.079	1.079	1.117	1.125	1.456	1.531	1.228
13:29:22	1.387	1.339	0.943	0.843	0.92	1.139	1.377	1.391	1.081	1.133	1.437	1.585	1.254	1.119	1.04	1.075	1.135	1.09	0.978	1	1.248	1.272	1.08	1.098	1.381	1.302	1.125	1.161	1.117	1.12	1.162	0.918	1.337	1.328	1.403	1.51	1.346	1.289	1.293	1.303	0.576	0.457	1.086	1.085	1.123	1.131	1.462	1.537	1.23
13:39:22	1.388	1.34	0.986	0.872	0.954	1.146	1.384	1.396	1.088	1.139	1.438	1.589	1.255	1.125	1.047	1.082	1.147	1.103	0.99	1.011	1.256	1.278	1.086	1.099	1.384	1.307	1.128	1.169	1.128	1.128	1.188	0.952	1.345	1.331	1.409	1.513	1.343	1.287	1.301	1.315	0.606	0.48	1.091	1.088	1.128	1.137	1.468	1.543	1.233
13:49:22	1.39	1.34	1.03	0.92	0.981	1.153	1.392	1.403	1.094	1.142	1.444	1.595	1.26	1.13	1.054	1.089	1.161	1.116	1.002	1.019	1.262	1.287	1.092	1.102	1.386	1.313	1.133	1.171	1.145	1.136	1.21	0.981	1.354	1.34	1.418	1.515	1.341	1.291	1.31	1.319	0.634	0.503	1.094	1.094	1.133	1.143	1.476	1.55	1.235
13:59:22	1.395	1.346	1.072	0.967	1.009	1.158	1.398	1.408	1.1	1.148	1.448	1.599	1.261	1.133	1.059	1.096	1.17	1.127	1.012	1.027	1.264	1.292	1.096	1.104	1.39	1.316	1.137	1.185	1.154	1.144	1.227	1.012	1.36	1.347	1.426	1.516	1.348	1.292	1.319	1.325	0.663	0.527	1.101	1.098	1.138	1.147	1.482	1.554	1.235
14:09:22	1.398	1.347	1.108	1.011	1.033	1.163	1.404	1.414	1.105	1.151	1.453	1.607	1.267	1.136	1.065	1.102	1.18	1.139	1.022	1.035	1.269	1.3	1.097	1.104	1.394	1.325	1.142	1.194	1.162	1.154	1.249	1.04	1.368	1.354	1.43	1.523	1.348	1.295	1.326	1.333	0.694	0.551	1.105	1.104	1.142	1.153	1.49	1.559	1.236
14:19:22	1.401	1.349	1.142	1.054	1.057	1.165	1.409	1.42	1.109	1.154	1.458	1.614	1.267	1.14	1.07	1.107	1.19	1.15	1.031	1.043	1.275	1.31	1.099	1.106	1.398	1.331	1.145	1.2	1.169	1.162	1.258	1.072	1.374	1.36	1.436	1.526	1.352	1.297	1.331	1.336	0.721	0.575	1.109	1.107	1.147	1.158	1.493	1.564	1.237
14:29:22	1.405	1.354	1.175	1.102	1.082	1.168	1.415	1.425	1.113	1.159	1.463	1.623	1.27	1.143	1.075	1.116	1.2	1.161	1.04	1.049	1.283	1.319	1.103	1.107	1.401	1.339	1.15	1.213	1.181	1.168	1.276	1.096	1.38	1.367	1.444	1.531	1.352	1.303	1.335	1.345	0.751	0.599	1.115	1.112	1.152	1.162	1.502	1.57	1.238
14:39:22	1.411	1.356	1.208	1.14	1.102	1.171	1.419	1.427	1.117	1.162	1.469	1.629	1.271	1.147	1.079	1.121	1.209	1.17	1.049	1.056	1.288	1.326	1.105	1.111	1.403	1.346	1.154	1.219	1.191	1.173	1.29	1.122	1.383	1.373	1.452	1.533	1.355	1.304	1.335	1.351	0.779	0.623	1.121	1.115	1.155	1.167	1.507	1.573	1.239
14:49:22	1.411	1.358	1.235	1.161	1.12	1.17	1.425	1.432	1.121	1.165	1.473	1.637	1.274	1.149	1.084	1.125	1.22	1.179	1.055	1.062	1.293	1.335	1.107	1.112	1.408	1.353	1.157	1.224	1.198	1.181	1.3	1.149	1.388	1.379	1.452	1.537	1.359	1.309	1.337	1.353	0.808	0.646	1.126	1.12	1.159	1.17	1.509	1.574	1.239
14:59:22	1.413	1.362	1.256	1.198	1.139	1.172	1.432	1.435	1.123	1.168	1.48	1.644	1.277	1.152	1.087	1.131	1.229	1.188	1.062	1.066	1.298	1.344	1.11	1.114	1.411	1.357	1.16	1.228	1.203	1.185	1.313	1.169	1.392	1.385	1.462	1.54	1.36	1.312	1.335	1.354	0.832	0.668	1.132	1.124	1.162	1.174	1.515	1.578	1.24
15:09:22	1.414	1.364	1.279	1.226	1.156	1.175	1.437	1.437	1.127	1.171	1.486	1.648	1.278	1.154	1.091	1.134	1.236	1.195	1.069	1.072	1.303	1.351	1.112	1.116	1.416	1.364	1.163	1.236	1.208	1.188	1.324	1.19	1.397	1.391	1.467	1.546	1.36	1.316	1.333	1.358	0.859	0.691	1.137	1.13	1.166	1.176	1.517	1.583	1.24
15:19:22	1.422	1.368	1.3	1.255	1.173	1.175	1.442	1.441	1.13	1.173	1.493	1.655	1.281	1.156	1.094	1.14	1.244	1.203	1.075	1.076	1.312	1.359	1.115	1.117	1.421	1.372	1.165	1.241	1.212	1.191	1.33	1.209	1.402	1.398	1.469	1.551	1.365	1.321	1.334	1.358	0.889	0.714	1.142	1.136	1.169	1.18	1.522	1.586	1.241
15:29:22	1.425	1.373	1.319	1.274	1.183	1.176	1.448	1.446	1.132	1.176	1.502	1.66	1.283	1.161	1.097	1.144	1.253	1.21	1.081	1.081	1.318	1.369	1.117	1.119	1.424	1.378	1.169	1.246	1.217	1.197	1.339	1.226	1.404	1.403	1.477	1.552	1.371	1.325	1.334	1.357	0.916	0.737	1.145	1.141	1.171	1.182	1.527	1.591	1.242
15:39:22	1.421	1.373	1.334	1.294	1.195	1.177	1.449	1.45	1.135	1.179	1.506	1.664	1.288	1.164	1.101	1.149	1.26	1.217	1.087	1.086	1.321	1.376	1.117	1.121	1.423	1.382	1.172	1.251	1.218	1.198	1.345	1.241	1.408	1.406	1.482	1.553	1.369	1.328	1.333	1.357	0.941	0.758	1.15	1.146	1.173	1.184	1.525	1.593	1.242
15:49:22	1.429	1.377	1.348	1.317	1.202	1.179	1.453	1.452	1.138	1.18	1.516	1.667	1.291	1.166	1.103	1.152	1.267	1.223	1.091	1.09	1.333	1.382	1.12	1.122	1.425	1.391	1.173	1.253	1.223	1.204	1.351	1.255	1.41	1.409	1.483	1.557	1.37	1.333	1.334	1.359	0.965	0.779	1.155	1.15	1.175	1.185	1.531	1.593	1.242
15:59:22	1.431	1.377	1.362	1.333	1.212	1.178	1.456	1.457	1.14	1.182	1.521	1.672	1.291	1.168	1.106	1.155	1.276	1.228	1.096	1.095	1.338	1.388	1.122	1.124	1.434	1.395	1.174	1.256	1.236	1.206	1.353	1.27	1.412	1.415	1.488	1.562	1.376	1.335	1.334	1.359	0.99	0.799	1.158	1.158	1.177	1.188	1.532	1.594	1.243
16:09:22	1.436	1.384	1.372	1.353	1.218	1.18	1.462	1.462	1.142	1.183	1.527	1.675	1.296	1.171	1.109	1.159	1.283	1.236	1.101	1.099	1.346	1.395	1.123	1.124	1.439	1.397	1.176	1.26	1.241	1.208	1.359	1.284	1.417	1.416	1.494	1.565	1.379	1.34	1.336	1.359	1.016	0.821	1.162	1.164	1.178	1.189	1.532	1.6	1.243
16:19:22	1.438	1.388	1.381	1.371	1.224	1.181	1.468	1.465	1.145	1.185	1.536	1.678	1.299	1.174	1.111	1.165	1.291	1.243	1.106	1.102	1.355	1.402	1.125	1.126	1.443	1.404	1.178	1.262	1.245	1.211	1.362	1.296	1.415	1.422	1.496	1.57	1.383	1.343	1.337	1.355	1.038	0.84	1.166	1.17	1.179	1.19	1.536	1.601	1.245
16:29:22	1.439	1.384	1.39	1.381	1.231	1.183	1.472	1.467	1.147	1.187	1.543	1.68	1.301	1.176	1.115	1.168	1.298	1.248	1.11	1.107	1.36	1.408	1.125	1.127	1.448	1.408	1.178	1.27	1.238	1.214	1.367	1.306	1.423	1.422	1.5	1.569	1.385	1.345	1.336	1.358	1.06	0.86	1.167	1.174	1.181	1.192	1.538	1.606	1.245
16:39:22	1.445	1.389	1.398	1.394	1.242	1.184	1.48	1.473	1.148	1.188	1.548	1.68	1.305	1.178	1.117	1.172	1.302	1.255	1.113	1.111	1.368	1.413	1.127	1.129	1.456	1.416	1.179	1.274	1.245	1.216	1.371	1.316	1.426	1.429	1.504	1.571	1.383	1.35	1.339	1.36	1.082	0.879	1.171	1.18	1.181	1.192	1.54	1.607	1.245
16:49:22	1.446	1.389	1.403	1.401	1.246	1.184	1.483	1.478	1.149	1.19	1.555	1.683	1.306	1.182	1.121	1.175	1.307	1.259	1.117	1.113	1.375	1.419	1.129	1.131	1.459	1.421	1.18	1.278	1.249	1.218	1.373	1.325	1.428	1.432	1.506	1.575	1.383	1.352	1.341	1.36	1.1	0.898	1.175	1.185	1.182	1.193	1.542	1.611	1.246
16:59:22	1.453	1.395	1.412	1.413	1.249	1.185	1.485	1.48	1.15	1.191	1.563	1.682	1.31	1.185	1.123	1.18	1.313	1.267	1.121	1.115	1.381	1.423	1.131	1.132	1.462	1.424	1.18	1.28	1.252	1.219	1.375	1.331	1.432	1.433	1.511	1.579	1.391	1.355	1.343	1.363	1.118	0.916	1.177	1.189	1.183	1.194	1.545	1.613	1.246
17:09:22	1.45	1.395	1.416	1.419	1.251	1.186	1.49	1.486	1.151	1.192	1.567	1.686	1.312	1.186	1.126	1.184	1.317	1.272	1.124	1.119	1.387	1.426	1.132	1.133	1.466	1.432	1.182	1.282	1.254	1.22	1.378	1.34	1.434	1.437	1.515	1.581	1.392	1.359	1.344	1.365	1.135	0.933	1.179	1.196	1.184	1.195	1.546	1.613	1.247
17:19:22	1.455	1.396	1.422	1.425	1.256	1.188	1.498	1.491	1.152	1.192	1.571	1.686	1.314	1.188	1.129	1.187	1.325	1.275	1.126	1.122	1.39	1.433	1.133	1.134	1.471	1.436	1.183	1.288	1.253	1.222	1.379	1.344	1.436	1.44	1.515	1.581	1.393	1.361	1.344	1.365	1.151	0.95	1.182	1.201	1.186	1.196	1.55	1.616	1.247
17:29:22	1.456	1.401	1.427	1.433	1.259	1.19	1.501	1.497	1.153	1.194	1.576	1.686	1.318	1.191	1.131	1.191	1.331	1.28	1.128	1.126	1.393	1.436	1.134	1.136	1.475	1.438	1.183	1.293	1.254	1.223	1.381	1.344	1.438	1.444	1.519	1.583	1.393	1.364	1.347	1.367	1.165	0.966	1.186	1.205	1.186	1.197	1.55	1.616	1.248
17:39:22	1.459	1.401	1.432	1.437	1.26	1.189	1.502	1.5	1.154	1.194	1.582	1.686	1.32	1.193	1.133	1.192	1.336	1.285	1.131	1.129	1.397	1.44	1.136	1.137	1.477	1.445	1.184	1.294	1.256	1.223	1.384	1.352	1.441	1.446	1.522	1.587	1.396	1.365	1.346	1.366	1.179	0.982	1.189	1.211	1.187	1.198	1.553	1.62	1.249
17:49:22	1.461	1.402	1.437	1.442	1.264	1.19	1.503	1.502	1.155	1.194	1.586	1.686	1.323	1.194	1.136	1.197	1.343	1.291	1.134	1.132	1.403	1.443	1.137	1.138	1.477	1.447	1.185	1.294	1.256	1.225	1.384	1.352	1.446	1.448	1.523	1.589	1.397	1.365	1.347	1.368	1.191	0.994	1.193	1.216	1.187	1.198	1.554	1.622	1.249
17:59:22	1.459	1.403	1.443	1.45	1.266	1.191	1.504	1.505	1.155	1.195	1.589	1.686	1.323	1.196	1.138	1.2	1.348	1.296	1.136	1.135	1.407	1.446	1.14	1.14	1.486	1.451	1.187	1.296	1.258	1.225	1.384	1.356	1.447	1.45	1.527	1.591	1.401	1.367	1.348	1.369	1.201	1.008	1.196	1.222	1.188	1.2	1.556	1.623	1.25
18:09:22	1.469	1.404	1.449	1.455	1.269	1.194	1.508	1.509	1.157	1.196	1.593	1.687	1.327	1.197	1.141	1.204	1.357	1.302	1.139	1.137	1.413	1.45	1.141	1.141	1.488	1.456	1.187	1.302	1.259	1.226	1.385	1.361	1.449	1.455	1.528	1.596	1.401	1.37	1.35	1.373	1.212	1.021	1.199	1.227	1.189	1.201	1.559	1.623	1.251
18:19:22	1.468	1.409	1.456	1.461	1.271	1.195	1.511	1.511	1.157	1.196	1.599	1.689	1.33	1.199	1.144	1.206	1.363	1.306	1.141	1.14	1.414	1.454	1.143	1.142	1.483	1.459	1.19	1.301	1.26	1.228	1.384	1.362	1.451	1.456	1.531	1.599	1.398	1.372	1.35	1.374	1.221	1.032	1.203	1.234	1.19	1.201	1.559	1.626	1.253
18:29:22	1.47	1.411	1.46	1.469	1.274	1.196	1.517	1.514	1.158	1.197	1.602	1.689	1.334	1.2	1.146	1.209	1.368	1.312	1.143	1.142	1.419	1.458	1.144	1.145	1.492	1.459	1.189	1.304	1.26	1.228	1.382	1.366	1.455	1.458	1.531	1.599	1.399	1.373	1.35	1.371	1.23	1.044	1.207	1.238	1.191	1.203	1.562	1.63	1.254
18:39:22	1.473	1.413	1.463	1.474	1.276	1.2	1.517	1.514	1.159	1.197	1.603	1.689	1.335	1.202	1.149	1.214	1.375	1.317	1.145	1.144	1.422	1.461	1.145	1.147	1.495	1.466	1.191	1.308	1.262	1.228	1.385	1.366	1.458	1.463	1.536	1.597	1.403	1.372	1.352	1.373	1.238	1.055	1.211	1.244	1.192	1.203	1.563	1.633	1.254
18:49:22	1.477	1.413	1.467	1.477	1.28	1.201	1.523	1.517	1.159	1.197	1.604	1.691	1.338	1.204	1.151	1.216	1.38	1.323	1.147	1.147	1.427	1.464	1.148	1.148	1.502	1.469	1.192	1.308	1.262	1.229	1.384	1.366	1.459	1.465	1.537	1.599	1.4	1.377	1.35	1.379	1.247	1.065	1.215	1.249	1.192	1.204	1.565	1.636	1.255
18:59:22	1.477	1.419	1.472	1.48	1.28	1.201	1.524	1.52	1.16	1.198	1.61	1.69	1.342	1.206	1.152	1.22	1.387	1.329	1.148	1.148	1.43	1.467	1.149	1.15	1.502	1.47	1.193	1.312	1.261	1.23	1.385	1.368	1.462	1.465	1.539	1.603	1.404	1.376	1.351	1.379	1.253	1.075	1.218	1.255	1.194	1.205	1.566	1.635	1.257
19:09:22	1.473	1.414	1.475	1.484	1.282	1.204	1.519	1.52	1.161	1.199	1.612	1.688	1.34	1.207	1.153	1.221	1.392	1.335	1.149	1.152	1.428	1.469	1.151	1.154	1.502	1.476	1.194	1.314	1.261	1.232	1.387	1.37	1.46	1.465	1.54	1.6	1.398	1.375	1.35	1.379	1.26	1.083	1.222	1.26	1.194	1.205	1.561	1.632	1.257
19:19:22	1.482	1.423	1.481	1.489	1.284	1.205	1.53	1.528	1.161	1.199	1.614	1.69	1.348	1.208	1.156	1.227	1.4	1.34	1.15	1.154	1.436	1.472	1.153	1.156	1.508	1.478	1.195	1.313	1.263	1.231	1.387	1.371	1.463	1.469	1.542	1.604	1.405	1.38	1.348	1.381	1.266	1.09	1.226	1.266	1.194	1.206	1.566	1.634	1.257
19:29:22	1.48	1.42	1.486	1.494	1.286	1.207	1.528	1.528	1.162	1.2	1.614	1.687	1.35	1.21	1.158	1.228	1.405	1.347	1.152	1.157	1.438	1.476	1.155	1.159	1.51	1.481	1.196	1.315	1.265	1.231	1.389	1.368	1.465	1.471	1.543	1.606	1.405	1.379	1.347	1.386	1.272	1.099	1.23	1.271	1.194	1.206	1.566	1.637	1.259
19:39:22	1.483	1.421	1.491	1.498	1.287	1.21	1.529	1.53	1.163	1.199	1.618	1.689	1.352	1.212	1.161	1.232	1.41	1.352	1.152	1.159	1.441	1.48	1.156	1.163	1.508	1.484	1.198	1.317	1.264	1.233	1.389	1.373	1.466	1.469	1.548	1.605	1.407	1.379	1.345	1.384	1.277	1.108	1.233	1.276	1.195	1.207	1.564	1.636	1.26
19:49:22	1.487	1.424	1.494	1.502	1.288	1.21	1.53	1.534	1.163	1.2	1.622	1.689	1.356	1.213	1.163	1.237	1.415	1.357	1.154	1.162	1.445	1.482	1.159	1.165	1.516	1.489	1.198	1.32	1.265	1.233	1.39	1.373	1.467	1.471	1.549	1.608	1.403	1.381	1.343	1.387	1.281	1.115	1.236	1.282	1.195	1.208	1.567	1.637	1.261
19:59:22	1.49	1.425	1.5	1.508	1.29	1.212	1.531	1.54	1.163	1.2	1.624	1.69	1.359	1.215	1.165	1.239	1.421	1.362	1.155	1.165	1.447	1.485	1.162	1.168	1.519	1.492	1.2	1.32	1.266	1.233	1.39	1.374	1.468	1.472	1.551	1.608	1.404	1.383	1.341	1.386	1.286	1.121	1.24	1.285	1.196	1.208	1.565	1.638	1.262
20:09:22	1.49	1.427	1.504	1.51	1.29	1.216	1.532	1.535	1.164	1.201	1.622	1.691	1.362	1.216	1.168	1.244	1.426	1.366	1.156	1.167	1.45	1.487	1.165	1.173	1.521	1.497	1.201	1.325	1.266	1.234	1.39	1.373	1.47	1.474	1.556	1.61	1.408	1.383	1.34	1.387	1.289	1.127	1.243	1.29	1.196	1.208	1.565	1.637	1.263
20:19:22	1.49	1.429	1.507	1.513	1.292	1.218	1.536	1.537	1.165	1.202	1.624	1.692	1.365	1.217	1.169	1.248	1.43	1.372	1.157	1.17	1.45	1.487	1.168	1.178	1.523	1.496	1.202	1.323	1.266	1.234	1.391	1.374	1.471	1.477	1.554	1.609	1.408	1.384	1.338	1.392	1.293	1.133	1.248	1.296	1.196	1.208	1.566	1.637	1.264
20:29:22	1.49	1.428	1.51	1.518	1.294	1.22	1.535	1.534	1.165	1.201	1.629	1.689	1.368	1.219	1.171	1.252	1.435	1.375	1.158	1.173	1.453	1.488	1.172	1.183	1.525	1.501	1.204	1.328	1.266	1.235	1.392	1.374	1.474	1.476	1.558	1.611	1.408	1.385	1.337	1.392	1.296	1.139	1.251	1.302	1.196	1.209	1.565	1.636	1.264
20:39:22	1.492	1.431	1.512	1.521	1.294	1.222	1.536	1.537	1.165	1.201	1.626	1.691	1.372	1.22	1.172	1.257	1.439	1.383	1.16	1.176	1.455	1.491	1.175	1.188	1.527	1.503	1.204	1.329	1.267	1.236	1.393	1.373	1.476	1.478	1.559	1.612	1.409	1.387	1.336	1.388	1.3	1.144	1.255	1.306	1.196	1.209	1.566	1.637	1.266
20:49:22	1.495	1.43	1.517	1.526	1.296	1.224	1.541	1.541	1.165	1.201	1.627	1.694	1.373	1.222	1.174	1.261	1.443	1.387	1.161	1.178	1.457	1.493	1.179	1.194	1.528	1.507	1.206	1.329	1.267	1.236	1.394	1.374	1.478	1.481	1.561	1.613	1.408	1.388	1.336	1.391	1.302	1.149	1.257	1.31	1.197	1.209	1.568	1.637	1.267
20:59:22	1.494	1.432	1.516	1.526	1.297	1.226	1.536	1.545	1.166	1.202	1.626	1.69	1.378	1.223	1.176	1.264	1.446	1.39	1.162	1.182	1.459	1.495	1.182	1.199	1.531	1.51	1.207	1.332	1.268	1.236	1.393	1.375	1.48	1.484	1.56	1.613	1.408	1.389	1.335	1.389	1.305	1.152	1.26	1.315	1.197	1.21	1.569	1.636	1.268
21:09:22	1.496	1.432	1.519	1.53	1.298	1.228	1.546	1.542	1.166	1.203	1.629	1.69	1.382	1.225	1.178	1.268	1.449	1.394	1.163	1.185	1.463	1.5	1.186	1.204	1.533	1.511	1.207	1.333	1.269	1.236	1.395	1.377	1.48	1.485	1.561	1.611	1.411	1.391	1.334	1.39	1.308	1.155	1.263	1.32	1.196	1.21	1.569	1.634	1.27
21:19:22	1.5	1.433	1.519	1.533	1.302	1.232	1.546	1.543	1.166	1.202	1.63	1.692	1.385	1.226	1.18	1.273	1.453	1.399	1.165	1.187	1.464	1.501	1.19	1.21	1.537	1.513	1.209	1.332	1.268	1.236	1.394	1.376	1.482	1.485	1.565	1.616	1.408	1.393	1.333	1.391	1.308	1.159	1.266	1.325	1.198	1.21	1.568	1.633	1.27
21:29:22	1.497	1.436	1.52	1.536	1.305	1.233	1.546	1.545	1.167	1.202	1.631	1.692	1.39	1.228	1.183	1.279	1.457	1.403	1.166	1.19	1.468	1.501	1.193	1.216	1.54	1.516	1.211	1.335	1.269	1.238	1.394	1.375	1.486	1.487	1.567	1.616	1.413	1.393	1.334	1.394	1.311	1.162	1.269	1.329	1.198	1.21	1.571	1.634	1.272
21:39:22	1.503	1.437	1.522	1.539	1.307	1.238	1.54	1.542	1.167	1.203	1.628	1.697	1.392	1.229	1.185	1.283	1.462	1.407	1.167	1.194	1.471	1.501	1.198	1.221	1.541	1.517	1.212	1.336	1.27	1.237	1.396	1.375	1.488	1.489	1.568	1.616	1.416	1.393	1.333	1.391	1.311	1.165	1.272	1.331	1.198	1.21	1.571	1.633	1.273
21:49:22	1.505	1.437	1.525	1.541	1.308	1.238	1.546	1.544	1.168	1.203	1.629	1.694	1.396	1.23	1.187	1.289	1.464	1.411	1.169	1.196	1.472	1.502	1.203	1.227	1.544	1.52	1.213	1.336	1.27	1.238	1.394	1.375	1.489	1.491	1.57	1.619	1.42	1.396	1.335	1.387	1.313	1.167	1.274	1.339	1.199	1.211	1.571	1.633	1.274
21:59:22	1.499	1.436	1.524	1.541	1.31	1.241	1.549	1.552	1.168	1.204	1.63	1.695	1.399	1.231	1.189	1.294	1.469	1.415	1.17	1.199	1.473	1.504	1.207	1.233	1.548	1.524	1.214	1.338	1.271	1.238	1.395	1.378	1.49	1.492	1.572	1.617	1.419	1.398	1.335	1.384	1.313	1.169	1.276	1.342	1.199	1.211	1.573	1.632	1.275
22:09:22	1.505	1.437	1.526	1.542	1.313	1.242	1.545	1.548	1.168	1.203	1.628	1.689	1.402	1.232	1.191	1.294	1.471	1.42	1.172	1.202	1.475	1.506	1.212	1.239	1.549	1.525	1.216	1.339	1.271	1.238	1.396	1.377	1.492	1.492	1.571	1.617	1.416	1.4	1.335	1.381	1.315	1.17	1.278	1.346	1.199	1.212	1.572	1.631	1.276
22:19:22	1.5	1.438	1.526	1.544	1.315	1.245	1.547	1.546	1.168	1.203	1.628	1.691	1.406	1.234	1.192	1.298	1.475	1.424	1.173	1.204	1.476	1.507	1.217	1.246	1.548	1.528	1.216	1.337	1.27	1.239	1.396	1.377	1.495	1.496	1.572	1.618	1.418	1.401	1.334	1.377	1.316	1.172	1.283	1.349	1.2	1.212	1.572	1.63	1.277
22:29:22	1.502	1.439	1.528	1.549	1.318	1.246	1.542	1.541	1.17	1.204	1.63	1.69	1.412	1.235	1.194	1.302	1.476	1.427	1.174	1.208	1.48	1.508	1.222	1.252	1.552	1.53	1.218	1.338	1.271	1.239	1.396	1.379	1.495	1.498	1.574	1.618	1.416	1.402	1.334	1.375	1.316	1.174	1.284	1.353	1.2	1.212	1.572	1.629	1.279
22:39:22	1.506	1.435	1.528	1.549	1.321	1.249	1.54	1.544	1.17	1.204	1.626	1.69	1.413	1.236	1.196	1.304	1.482	1.431	1.177	1.211	1.48	1.509	1.227	1.261	1.553	1.534	1.219	1.339	1.271	1.239	1.397	1.377	1.494	1.498	1.575	1.62	1.417	1.403	1.332	1.374	1.318	1.175	1.286	1.357	1.201	1.212	1.573	1.627	1.28
22:49:22	1.506	1.437	1.528	1.549	1.323	1.251	1.55	1.554	1.17	1.204	1.628	1.688	1.418	1.237	1.198	1.307	1.485	1.434	1.178	1.214	1.481	1.51	1.232	1.27	1.555	1.536	1.221	1.337	1.271	1.239	1.396	1.378	1.498	1.496	1.576	1.617	1.413	1.404	1.332	1.371	1.319	1.177	1.29	1.361	1.201	1.213	1.573	1.626	1.281
22:59:22	1.508	1.44	1.532	1.557	1.326	1.255	1.552	1.556	1.171	1.204	1.627	1.686	1.42	1.238	1.2	1.311	1.487	1.438	1.18	1.216	1.483	1.512	1.238	1.279	1.558	1.537	1.222	1.339	1.271	1.239	1.395	1.377	1.504	1.501	1.577	1.622	1.422	1.408	1.333	1.371	1.322	1.178	1.293	1.364	1.202	1.213	1.574	1.627	1.282
23:09:22	1.507	1.442	1.532	1.559	1.329	1.257	1.553	1.554	1.17	1.205	1.626	1.69	1.425	1.24	1.201	1.315	1.49	1.441	1.181	1.219	1.485	1.513	1.245	1.288	1.559	1.54	1.223	1.339	1.271	1.238	1.396	1.378	1.502	1.504	1.579	1.621	1.422	1.408	1.332	1.371	1.324	1.18	1.295	1.37	1.203	1.214	1.573	1.626	1.283
23:19:22	1.507	1.441	1.533	1.56	1.332	1.259	1.545	1.552	1.17	1.205	1.622	1.692	1.428	1.241	1.203	1.319	1.492	1.442	1.183	1.221	1.486	1.515	1.251	1.3	1.561	1.542	1.224	1.34	1.271	1.24	1.394	1.378	1.504	1.504	1.578	1.622	1.421	1.411	1.331	1.371	1.325	1.18	1.299	1.373	1.203	1.214	1.573	1.627	1.285
23:29:22	1.512	1.441	1.536	1.561	1.333	1.263	1.549	1.55	1.171	1.205	1.627	1.69	1.431	1.241	1.205	1.322	1.495	1.446	1.185	1.224	1.488	1.516	1.258	1.315	1.565	1.545	1.225	1.34	1.272	1.238	1.396	1.381	1.507	1.508	1.582	1.625	1.42	1.413	1.332	1.371	1.327	1.182	1.3	1.377	1.204	1.215	1.575	1.627	1.287
23:39:22	1.512	1.441	1.536	1.555	1.336	1.265	1.552	1.552	1.171	1.205	1.624	1.685	1.434	1.242	1.207	1.325	1.498	1.449	1.187	1.225	1.489	1.52	1.266	1.329	1.566	1.546	1.226	1.339	1.272	1.24	1.395	1.379	1.508	1.509	1.582	1.625	1.419	1.413	1.331	1.37	1.329	1.184	1.303	1.381	1.204	1.215	1.576	1.626	1.288
23:49:22	1.501	1.437	1.534	1.56	1.339	1.267	1.553	1.556	1.171	1.206	1.622	1.684	1.438	1.243	1.209	1.328	1.5	1.452	1.188	1.228	1.487	1.517	1.274	1.344	1.571	1.548	1.226	1.338	1.272	1.241	1.395	1.379	1.507	1.508	1.58	1.62	1.422	1.414	1.33	1.369	1.332	1.184	1.304	1.384	1.204	1.214	1.574	1.623	1.288
23:59:22	1.51	1.439	1.529	1.559	1.343	1.268	1.551	1.55	1.171	1.205	1.622	1.682	1.439	1.244	1.211	1.33	1.502	1.454	1.19	1.229	1.49	1.518	1.281	1.357	1.571	1.55	1.228	1.339	1.272	1.24	1.395	1.38	1.509	1.509	1.584	1.623	1.42	1.416	1.33	1.369	1.334	1.186	1.307	1.386	1.205	1.216	1.573	1.622	1.29
1 day, 0:09:22	1.51	1.439	1.536	1.558	1.347	1.27	1.547	1.551	1.172	1.206	1.619	1.682	1.443	1.246	1.213	1.333	1.505	1.457	1.192	1.231	1.492	1.522	1.29	1.369	1.573	1.551	1.228	1.338	1.271	1.24	1.395	1.381	1.512	1.511	1.583	1.624	1.421	1.418	1.331	1.37	1.336	1.187	1.309	1.389	1.205	1.216	1.574	1.625	1.291
[truncated: 35 more columns]
