# Supplementary material for: Effect of genetic background on the evolution of Vancomycin-Intermediate Staphylococcus aureus (VISA)
Source: PeerJ. 2021 Jul 13;9:e11764. doi: 10.7717/peerj.11764 (PMC8284308; doi:10.7717/peerj.11764)
Supplement: Supplemental Information 11 — Vancomycin MICs were determined by BMD, daptomycin MICs by Etest, and cefoxitin resistance by disc diffusion [file peerj-09-11764-s011.xlsx]

## Sheet: NRS70
	Dapto MIC(E-test)	Dapto R/S	Cefoxitin zone(disc)	Methicillin R/S	Vanc S/I	BMD ctrl	BMD 1 ug/ml	BMD 2 ug/ml	BMD 3 ug/ml	BMD 4 ug/ml	BMD 5 ug/ml	BMD 6 ug/ml	BMD 8 ug/ml	BMD 10 ug/ml	BMD 12 ug/ml	BMD 16 ug/ml	BMD Vanc MIC
NRS70	0.38	S	12	R	S	✔											1
8.1	0.19	S	11	R	I/R	✔	✔	✔	✔	✔	✔	✔					8
8.2	3	R	12	R	I	✔	✔	✔	✔	✔	✔						6
8.3	2	R	22	S	I	✔	✔	✔	✔	✔	✔	✔					8
8.4	3	R	13	R	I	✔	✔	✔	✔	✔	✔	✔	✔				10
8.5	1	S	7	R	I/R	✔	✔	✔	✔	✔	✔						6
8.6	3	R	7	R	I/R	✔	✔	✔	✔	✔	✔	✔	✔				10
8.7	3	R	8	R	I	✔	✔	✔	✔	✔	✔	✔					8
8.8	2	R	7	R	I	✔	✔	✔	✔	✔	✔	✔					8
8.9	1.5	R	16	R	I	✔	✔	✔	✔	✔	✔	✔					8
8.1	3	R	14	R	I	✔	✔	✔	✔	✔	✔	✔					8
8.11	2	R	13	R	I	✔	✔	✔	✔	✔	✔	✔					8
8.12	2	R	12	R	I	✔	✔	✔	✔	✔							5
8.13	3	R	10	R	I/R	✔	✔	✔	✔	✔	✔	✔	✔				10
8.14	1.5	R	21	R	I	✔	✔	✔	✔								4
8.15	1	S	11	R	I	✔	✔	✔	✔	✔	✔						6
8.16	2	R	12	R	I	✔	✔	✔	✔	✔	✔						6
8.17	3	R	12	R	I	✔	✔	✔	✔	✔	✔						6
8.18	0.75	S	13	R	I	✔	✔	✔	✔	✔	✔						6
8.19	4	R	11	R	I	✔	✔	✔	✔	✔	✔	✔					8
8.2	3	R	14	R	I	✔	✔	✔	✔	✔							5
8.21	2	R	9	R	I	✔	✔	✔	✔	✔							5
8.22	2	R	11	R	I	✔	✔	✔	✔	✔	✔						6
8.23	2	R	9	R	I	✔	✔	✔	✔	✔	✔	✔					8
8.24	1.5	R	9	R	I	✔	✔	✔	✔								4
8.25	1	S	9	R	I	✔	✔	✔	✔	✔							5
8.26	3	R	12	R	I	✔	✔	✔	✔	✔	✔	✔					8
8.27	2	R	9	R	I	✔	✔	✔	✔	✔							5
8.28	3	R	9	R	I	✔	✔	✔	✔	✔							5
8.29	2	R	16	R	I/R	✔	✔	✔	✔	✔	✔						6
8.3	2	R	20	R	I/R	✔	✔	✔	✔	✔	✔						6
8.31	3	R	12	R	I	✔	✔	✔	✔	✔	✔	✔					8
8.32	2	R	22	S	I/R	✔	✔	✔	✔	✔	✔						6
8.33	1.5	R	10	R	I	✔	✔	✔	✔	✔	✔						6
8.34	2	R	21	R	I	✔	✔	✔	✔	✔	✔						6
8.35	2	R	14	R	I	✔	✔	✔	✔	✔							5
8.36	3	R	18	R	I	✔	✔	✔	✔	✔	✔						6
8.37	2	R	9	R	I	✔	✔	✔	✔	✔	✔						6
8.38	1.5	R	7	R	I	✔	✔	✔	✔	✔	✔	✔					8
8.39	2	R	12	R	I	✔	✔	✔	✔	✔	✔						6
8.4	3	R	13	R	I	✔	✔	✔	✔	✔	✔						6
		<= 1 (S)		<= 21 (R) / >= 22 (S)	<= 2 (S) / 4-8 (I)

## Sheet: NRS70-simp
Strain	Dapto MIC(e-test)	Methicillin(disc)	Vanc MIC(BMD)
NRS70	0.38	R	1
NRS70.8.1	0.19	R	8
NRS70.8.2	3	R	6
NRS70.8.3	2	S	8
NRS70.8.4	3	R	10
NRS70.8.5	1	R	6
NRS70.8.6	3	R	10
NRS70.8.7	3	R	8
NRS70.8.8	2	R	8
NRS70.8.9	1.5	R	8
NRS70.8.10	3	R	8
NRS70.8.11	2	R	8
NRS70.8.12	2	R	5
NRS70.8.13	3	R	10
NRS70.8.14	1.5	S	4
NRS70.8.15	1	R	6
NRS70.8.16	2	R	6
NRS70.8.17	3	R	6
NRS70.8.18	0.75	R	6
NRS70.8.19	4	R	8
NRS70.8.20	3	R	5
NRS70.8.21	2	R	5
NRS70.8.22	2	R	6
NRS70.8.23	2	R	8
NRS70.8.24	1.5	R	4
NRS70.8.25	1	R	5
NRS70.8.26	3	R	8
NRS70.8.27	2	R	5
NRS70.8.28	3	R	5
NRS70.8.29	2	R	6
NRS70.8.30	2	R	6
NRS70.8.31	3	R	8
NRS70.8.32	2	S	6
NRS70.8.33	1.5	R	6
NRS70.8.34	2	R	6
NRS70.8.35	2	R	5
NRS70.8.36	3	R	6
NRS70.8.37	2	R	6
NRS70.8.38	1.5	R	8
NRS70.8.39	2	R	6
NRS70.8.40	3	R	6

## Sheet: NRS384
	Dapto MIC(E-test)	Dapto R/S	Cefoxitin zone(disc)	Methicillin R/S	Vanc S/I	BMD ctrl	BMD 1 ug/ml	BMD 2 ug/ml	BMD 4 ug/ml	BMD 8 ug/ml	BMD Vanc MIC		BMD ctrl	BMD 1 ug/ml	BMD 2 ug/ml	BMD 3 ug/ml	BMD 4 ug/ml	BMD 5 ug/ml	BMD 6 ug/ml	BMD 8 ug/ml	BMD 10 ug/ml	BMD 12 ug/ml	BMD 16 ug/ml	BMD Vanc MIC
NRS384	0.38	S	14	R	S	✔					1		✔											1
8.1	1.5	R	12	R	S/I	✔	✔	✔			4		✔	✔	✔	✔	✔							5
8.2	4	R	14	R	I	✔	✔	✔	✔		8		✔	✔	✔	✔	✔	✔						6
8.3	2	R	14	R	S/I	✔	✔	✔			4		✔	✔	✔	✔	✔							5
8.4	1.5	R	11	R	S/I	✔	✔	✔			4		✔	✔	✔	✔	✔	✔						6
8.5	2	R	14	R	I	✔	✔	✔	✔		8		✔	✔	✔	✔	✔	✔	✔					8
8.6	0.125	S	13	R	S	✔	✔	✔	✔		8		✔	✔	✔	✔	✔	✔	✔					8
8.7	0.25	S	12	R	S	✔	✔	✔			4		✔	✔	✔	✔	✔	✔	✔					8
8.8	2	R	7	R									✔	✔	✔	✔	✔	✔						6
8.9	6	R	11	R	I	✔	✔	✔	✔		8		✔	✔	✔	✔	✔	✔	✔					8
8.1	4	R	8	R	I	✔	✔	✔	✔		8		✔	✔	✔	✔	✔	✔	✔					8
8.11	1.5	R	14	R	I	✔	✔	✔			4		✔	✔	✔	✔	✔	✔						6
8.12	0.38	S	12	R	S	✔	✔	✔			4		✔	✔	✔	✔	✔	✔	✔					8
8.13	2	R	7	R		✔	✔	✔	✔		8		✔	✔	✔	✔	✔	✔	✔					8
8.14	3	R	13	R	I	✔	✔	✔	✔		8		✔	✔	✔	✔	✔	✔						6
8.15	3	R	8	R	I	✔	✔	✔	✔		8		✔	✔	✔	✔	✔	✔						6
8.16	1.5	R	9	R	S/I	✔	✔	✔			4		✔	✔	✔	✔								4
8.17	1.5	R	13	R	I	✔	✔	✔			4		✔	✔	✔	✔	✔							5
8.18	2	R	7	R	I	✔	✔	✔			4		✔	✔	✔	✔	✔							5
8.19	2	R	13	R	I	✔	✔	✔			4		✔	✔	✔	✔	✔	✔						6
8.2	3	R	14	R	I	✔	✔	✔	✔		8		✔	✔	✔	✔	✔	✔						6
8.21	3	R	14	R	I	✔	✔	✔	✔		8		✔	✔	✔	✔	✔							5
8.22	3	R	18	R	I	✔	✔	✔			4		✔	✔	✔	✔	✔							5
8.23	4	R	12	R	I	✔	✔	✔	✔		8		✔	✔	✔	✔	✔							5
8.24	2	R	12	R	I	✔	✔	✔			4		✔	✔	✔	✔	✔							5
8.25	3	R	9	R	I	✔	✔	✔			4		✔	✔	✔	✔	✔	✔						6
8.26	3	R	12	R	I	✔	✔	✔	✔		8		✔	✔	✔	✔	✔	✔	✔					8
8.27	1.5	R	18	R	I	✔	✔	✔			4		✔	✔	✔	✔	✔							5
8.28	1	S	9	R	I	✔	✔	✔			4		✔	✔	✔	✔								4
8.29	3	R	11	R	I	✔	✔	✔			4		✔	✔	✔	✔	✔	✔	✔					8
8.3	1.5	R	14	R	S/I	✔	✔	✔			4		✔	✔	✔	✔	✔	✔						6
8.31	1.5	R	10	R	I	✔	✔	✔			4		✔	✔	✔	✔								4
8.32	2	R	12	R	I	✔	✔	✔	✔		8		✔	✔	✔	✔	✔	✔						6
8.33	2	R	10	R	I	✔	✔	✔			4		✔	✔	✔	✔	✔	✔	✔					8
8.34	1	S	13	R	S/I	✔	✔	✔			4		✔	✔	✔	✔	✔							5
8.35	3	R	11	R	I	✔	✔	✔			4		✔	✔	✔	✔	✔							5
8.36	2	R	14	R	S/I	✔	✔	✔			4		✔	✔	✔	✔	✔	✔						6
8.37	0.75	S	13	R	I	✔	✔	✔			4		✔	✔	✔	✔								4
8.38	1.5	R	10	R	I	✔	✔	✔			4		✔	✔	✔	✔								4
8.39	3	R	14	R	S/I	✔	✔	✔			4		✔	✔	✔	✔	✔	✔						6
8.4	2	R	14	R	S/I	✔	✔	✔			4		✔	✔	✔	✔	✔	✔						6
		<= 1 (S)		<= 21 (R) / >= 22 (S)	<= 2 (S) / 4-8 (I)

## Sheet: NRS384-simp
Strain	Dapto MIC(e-test)	Methicillin(disc)	Vanc MIC(BMD)
NRS384	0.38	R	1
NRS384.8.1	1.5	R	5
NRS384.8.2	4	R	6
NRS384.8.3	2	R	5
NRS384.8.4	1.5	R	6
NRS384.8.5	2	R	8
NRS384.8.6	0.125	R	8
NRS384.8.7	0.25	R	8
NRS384.8.8	2	R	6
NRS384.8.9	6	R	8
NRS384.8.10	4	R	8
NRS384.8.11	1.5	R	6
NRS384.8.12	0.38	R	8
NRS384.8.13	2	R	8
NRS384.8.14	3	R	6
NRS384.8.15	3	R	6
NRS384.8.16	1.5	R	4
NRS384.8.17	1.5	R	5
NRS384.8.18	2	R	5
NRS384.8.19	2	R	6
NRS384.8.20	3	R	6
NRS384.8.21	3	R	5
NRS384.8.22	3	R	5
NRS384.8.23	4	R	5
NRS384.8.24	2	R	5
NRS384.8.25	3	R	6
NRS384.8.26	3	R	8
NRS384.8.27	1.5	R	5
NRS384.8.28	1	R	4
NRS384.8.29	3	R	8
NRS384.8.30	1.5	R	6
NRS384.8.31	1.5	R	4
NRS384.8.32	2	R	6
NRS384.8.33	2	R	8
NRS384.8.34	1	R	5
NRS384.8.35	3	R	5
NRS384.8.36	2	R	6
NRS384.8.37	0.75	R	4
NRS384.8.38	1.5	R	4
NRS384.8.39	3	R	6
NRS384.8.40	2	R	6
